# Supplementary material for: A phylogeny and revised classification of Squamata, including 4161 species of lizards and snakes
Source: Springer Nature journal article supplement (doi:10.1186/1471-2148-13-93), 2013-01-01

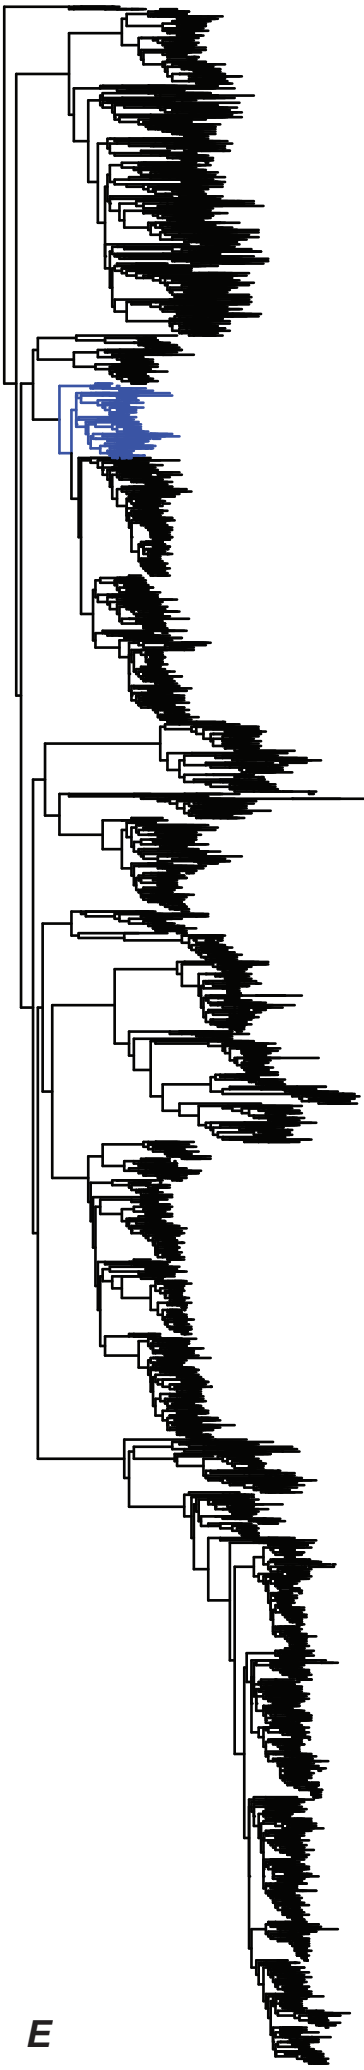

E

**Acontiinae**

- Typhlosaurus brairi*
- Typhlosaurus meyeri*
- Typhlosaurus caecus*
- Typhlosaurus vermii*
- Typhlosaurus lomiae*
- Acontias gariepensis*
- Acontias lineatus*
- Acontias litoralis*
- Acontias kgalagadi*
- Acontias meleagrns*
- Acontias percivali*
- Acontias rieppeli*
- Acontias breviceps*
- Acontias gracilicauda*
- Acontias plumbeus*
- Acontias poecilus*

**Scincidae**

- Mesoscincus schwartzei*
- Mesoscincus managuae*
- Ophiomorus punctatissimus*
- Ophiomorus latastii*
- Brachymeles apus*
- Brachymeles miriamae*
- Brachymeles tridactylus*
- Brachymeles bonitae*
- Brachymeles minimus*
- Brachymeles cebuensis*
- Brachymeles samarensis*
- Brachymeles talinis*
- Brachymeles elerae*
- Brachymeles schadenbergi*
- Brachymeles boulengeri*
- Brachymeles bicolor*
- Brachymeles gracilis*
- Brachymeles pathfinderi*
- Plestiodon tmdaoensis*
- Plestiodon kishinouyei*
- Plestiodon chinensis*
- Plestiodon quadrilineatus*
- Plestiodon tunganus*
- Plestiodon capito*
- Plestiodon parbouri*
- Plestiodon japonicus*
- Plestiodon laticutatus*
- Plestiodon elegans*
- Plestiodon marginatus*
- Plestiodon stimpsonii*
- Plestiodon reynoldsi*
- Plestiodon greggius*
- Plestiodon anthracinus*
- Plestiodon inexpectatus*
- Plestiodon laticeps*
- Plestiodon tetragrammus*
- Plestiodon callicephalus*
- Plestiodon obsoletus*
- Plestiodon iasciatus*
- Plestiodon multivirgatus*
- Plestiodon septentrionalis*
- Plestiodon longirostris*
- Plestiodon gilberti*
- Plestiodon lagunensis*
- Plestiodon skiltonianus*
- Plestiodon parviauriculatus*
- Plestiodon sumichrasti*
- Plestiodon lynxe*
- Plestiodon ochoterenae*
- Plestiodon parvulus*
- Plestiodon copei*
- Plestiodon brevirostris*
- Plestiodon dugesii*

**Scincinae**

- Eurylepis taeniolatus*
- Eumeces schneideri*
- Scincopus fasciatus*
- Eumeces algeriensis*
- Scincus scincus*
- Scincus mitranus*
- Pamelaescincus gardineri*
- Janetaescincus vesevitzgeraldi*
- Janetaescincus braueri*
- Gongylomorphus bojeri*
- Chalcides mauritanicus*
- Chalcides minutus*
- Chalcides guntheri*
- Chalcides chalcides*
- Chalcides pseudostratus*
- Chalcides striatus*
- Chalcides ocellatus*
- Chalcides sepsoides*
- Chalcides colosii*
- Chalcides bediagai*
- Chalcides boulengeri*
- Chalcides parallelus*
- Chalcides lanzai*
- Chalcides sexlineatus*
- Chalcides coeruleopunctatus*
- Chalcides viridanus*
- Chalcides sphenopsiformis*
- Chalcides mionecton*
- Chalcides manuei*
- Chalcides polylepis*
- Chalcides montanus*

- Sepsina angolensis*
- Typhlacontias brevipes*
- Typhlacontias punctatissimus*
- Feylinia grandisquamis*
- Feylinia polylepis*
- Feylinia curroni*
- Melanoseps occidentalis*
- Melanoseps ater*
- Melanoseps loveridgei*
- Hakaria simonyi*
- Proscelotes eggeli*
- Scelotes caffer*
- Scelotes arguineus*
- Scelotes mirus*
- Scelotes arenicolus*
- Scelotes bipes*
- Scelotes sexlineatus*
- Scelotes gronovii*
- Scelotes montispectus*
- Scelotes kasneri*
- Paracontias holomelas*
- Paracontias brocchii*
- Paracontias manify*
- Paracontias hildebrandti*
- Paracontias rothschildi*
- Madascincus melanopleura*
- Pseudoacontias menamainty*
- Madascincus igneoocaudatus*
- Madascincus muroundavae*
- Madascincus nanus*
- Madascincus stumpffi*
- Madascincus polleni*
- Madascincus intermedius*

- Amphiglossus melanurus*
- Amphiglossus ornaticeps*
- Amphiglossus mandokava*
- Amphiglossus tanyosoma*
- Pygomeles braconieri*
- Androngo trivittatus*
- Amphiglossus tsaratananensis*
- Amphiglossus reticulatus*
- Amphiglossus astrolabi*
- Voeltzkowa fierinensis*
- Voeltzkowa lineata*
- Voeltzkowa rubrocaudata*
- Amphiglossus splendidus*
- Amphiglossus anosyensis*
- Amphiglossus macrocercus*
- Amphiglossus punctatus*
- Amphiglossus frontoparietalis*

F-I

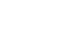

Supplement: 12862_2013_2346_MOESM8_ESM.pdf [file 12862_2013_2346_MOESM8_ESM.pdf]
