# Supplementary figures and images for: A phylogeny and revised classification of Squamata, including 4161 species of lizards and snakes
Source: Springer Nature journal article supplement (doi:10.1186/1471-2148-13-93), 2013-01-01

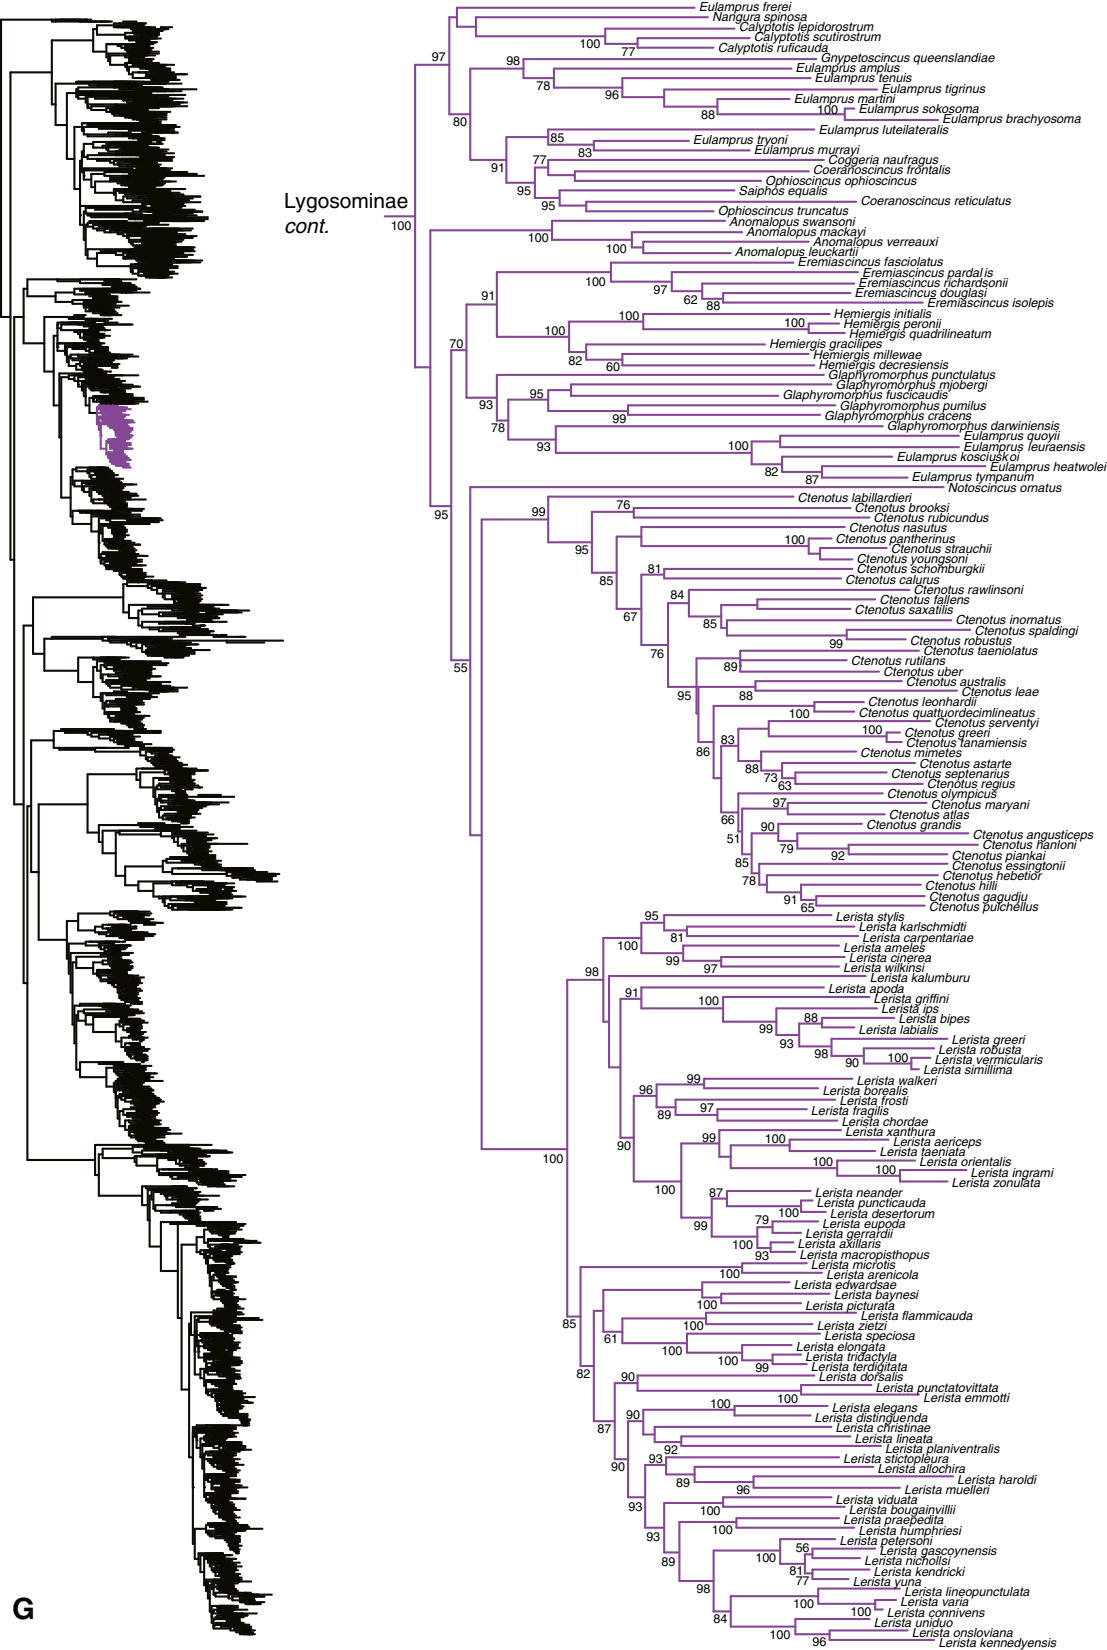

G

Supplement: 12862_2013_2346_MOESM10_ESM.pdf [file 12862_2013_2346_MOESM10_ESM.pdf]

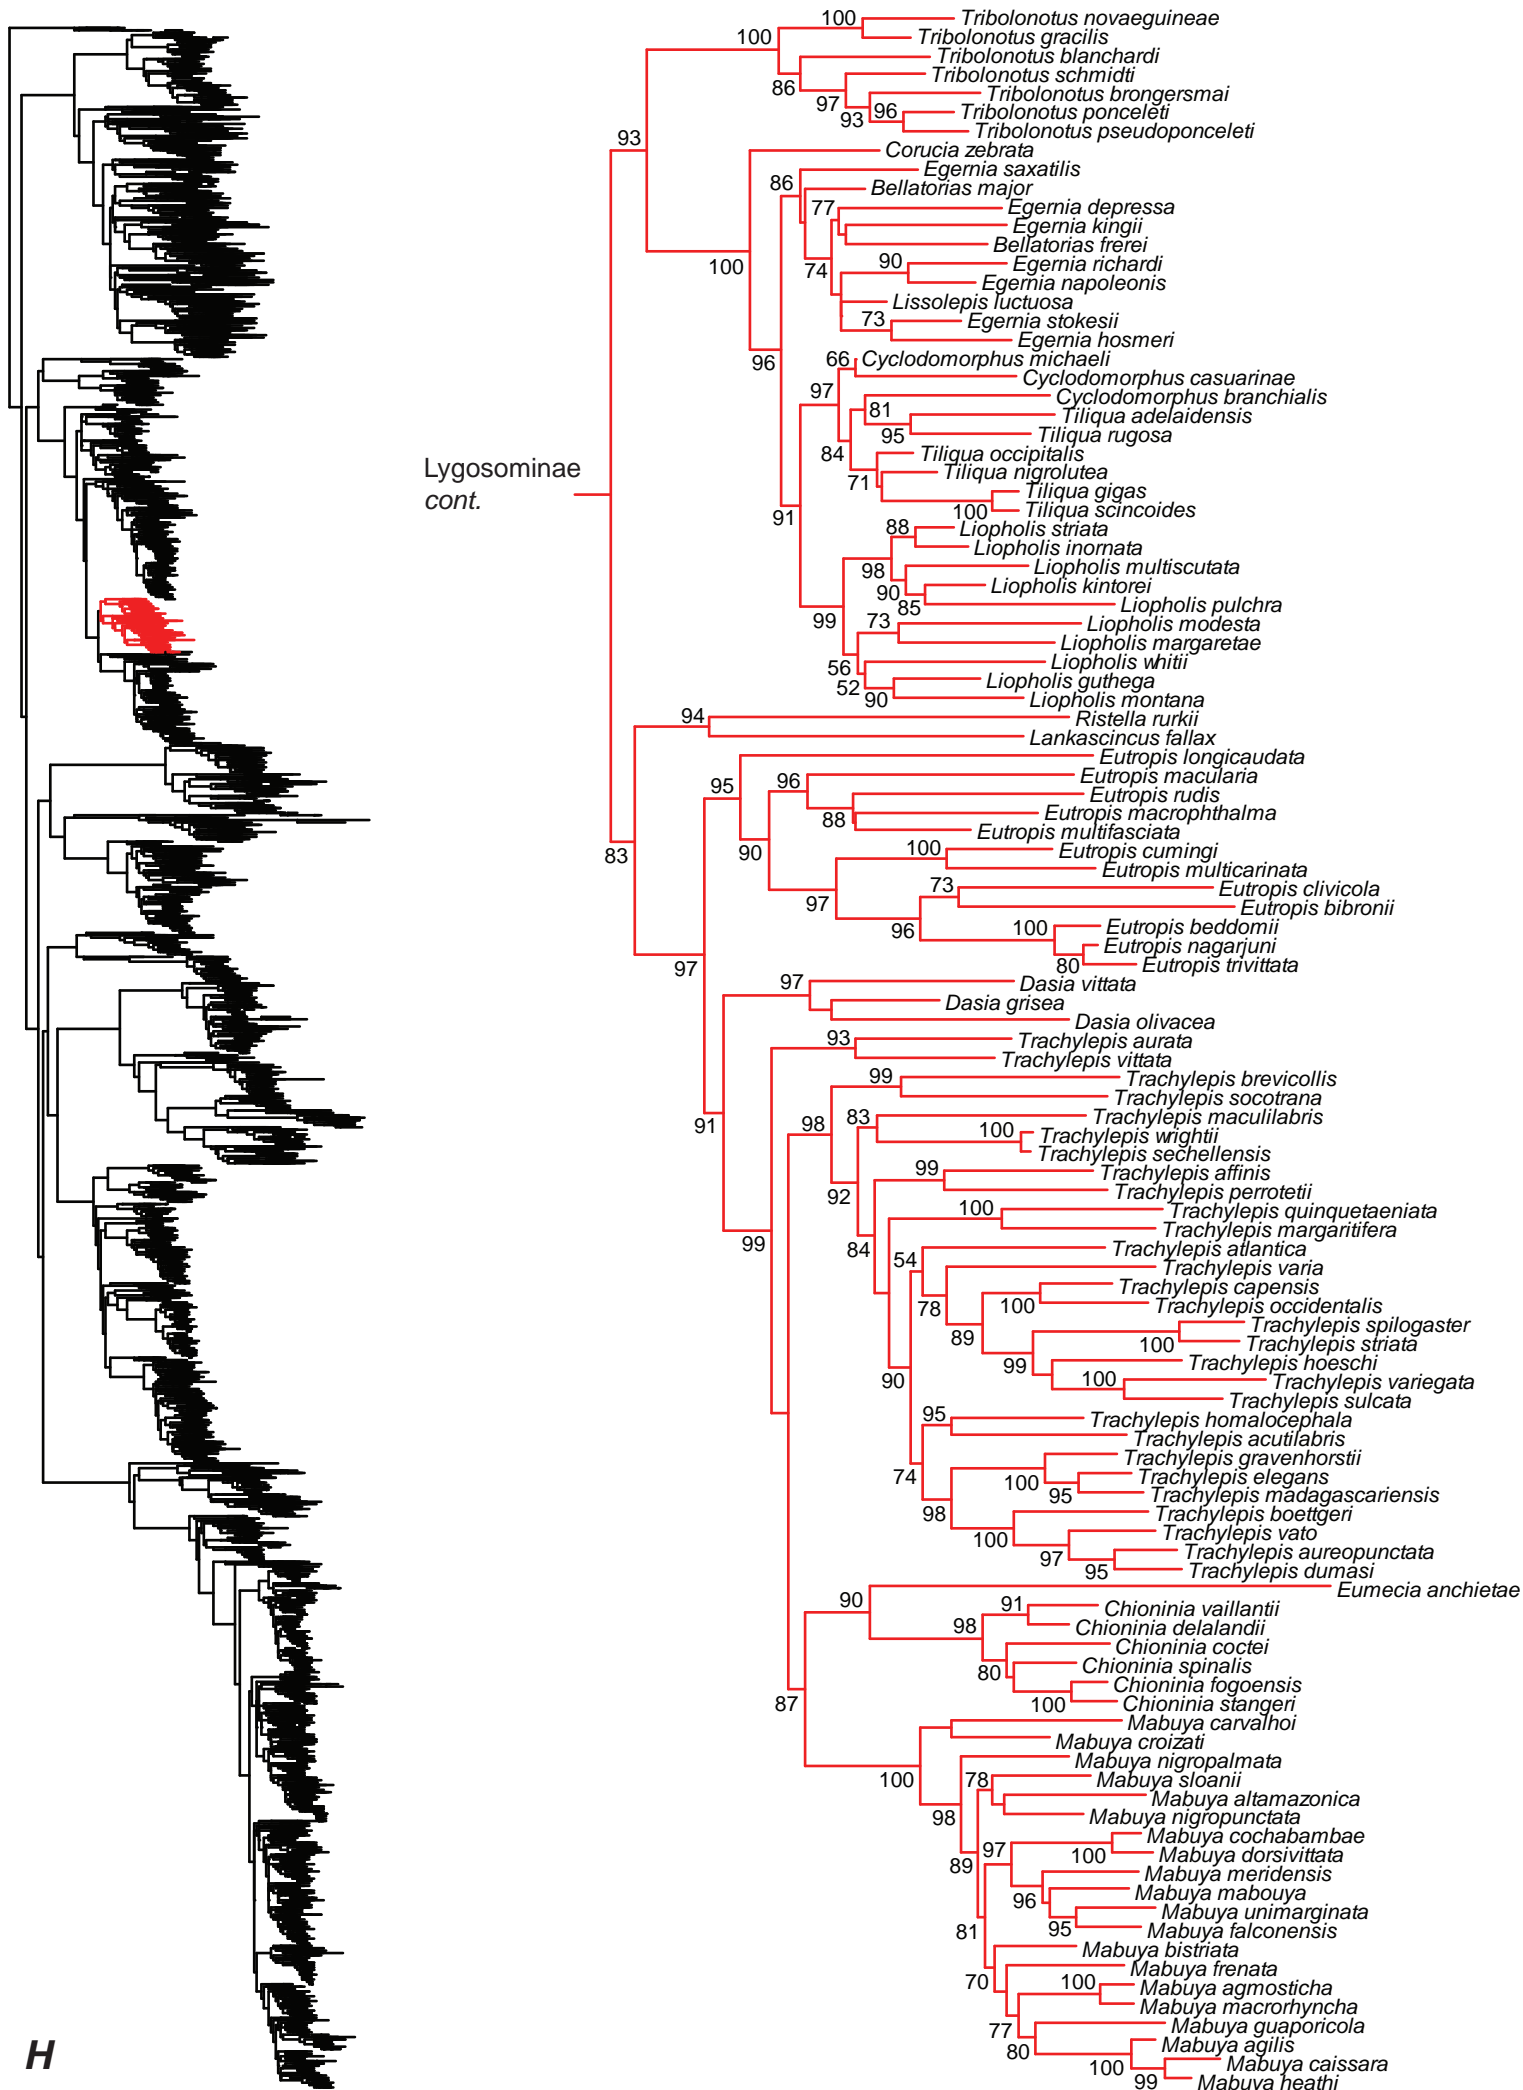

Supplement: 12862_2013_2346_MOESM11_ESM.pdf [file 12862_2013_2346_MOESM11_ESM.pdf]

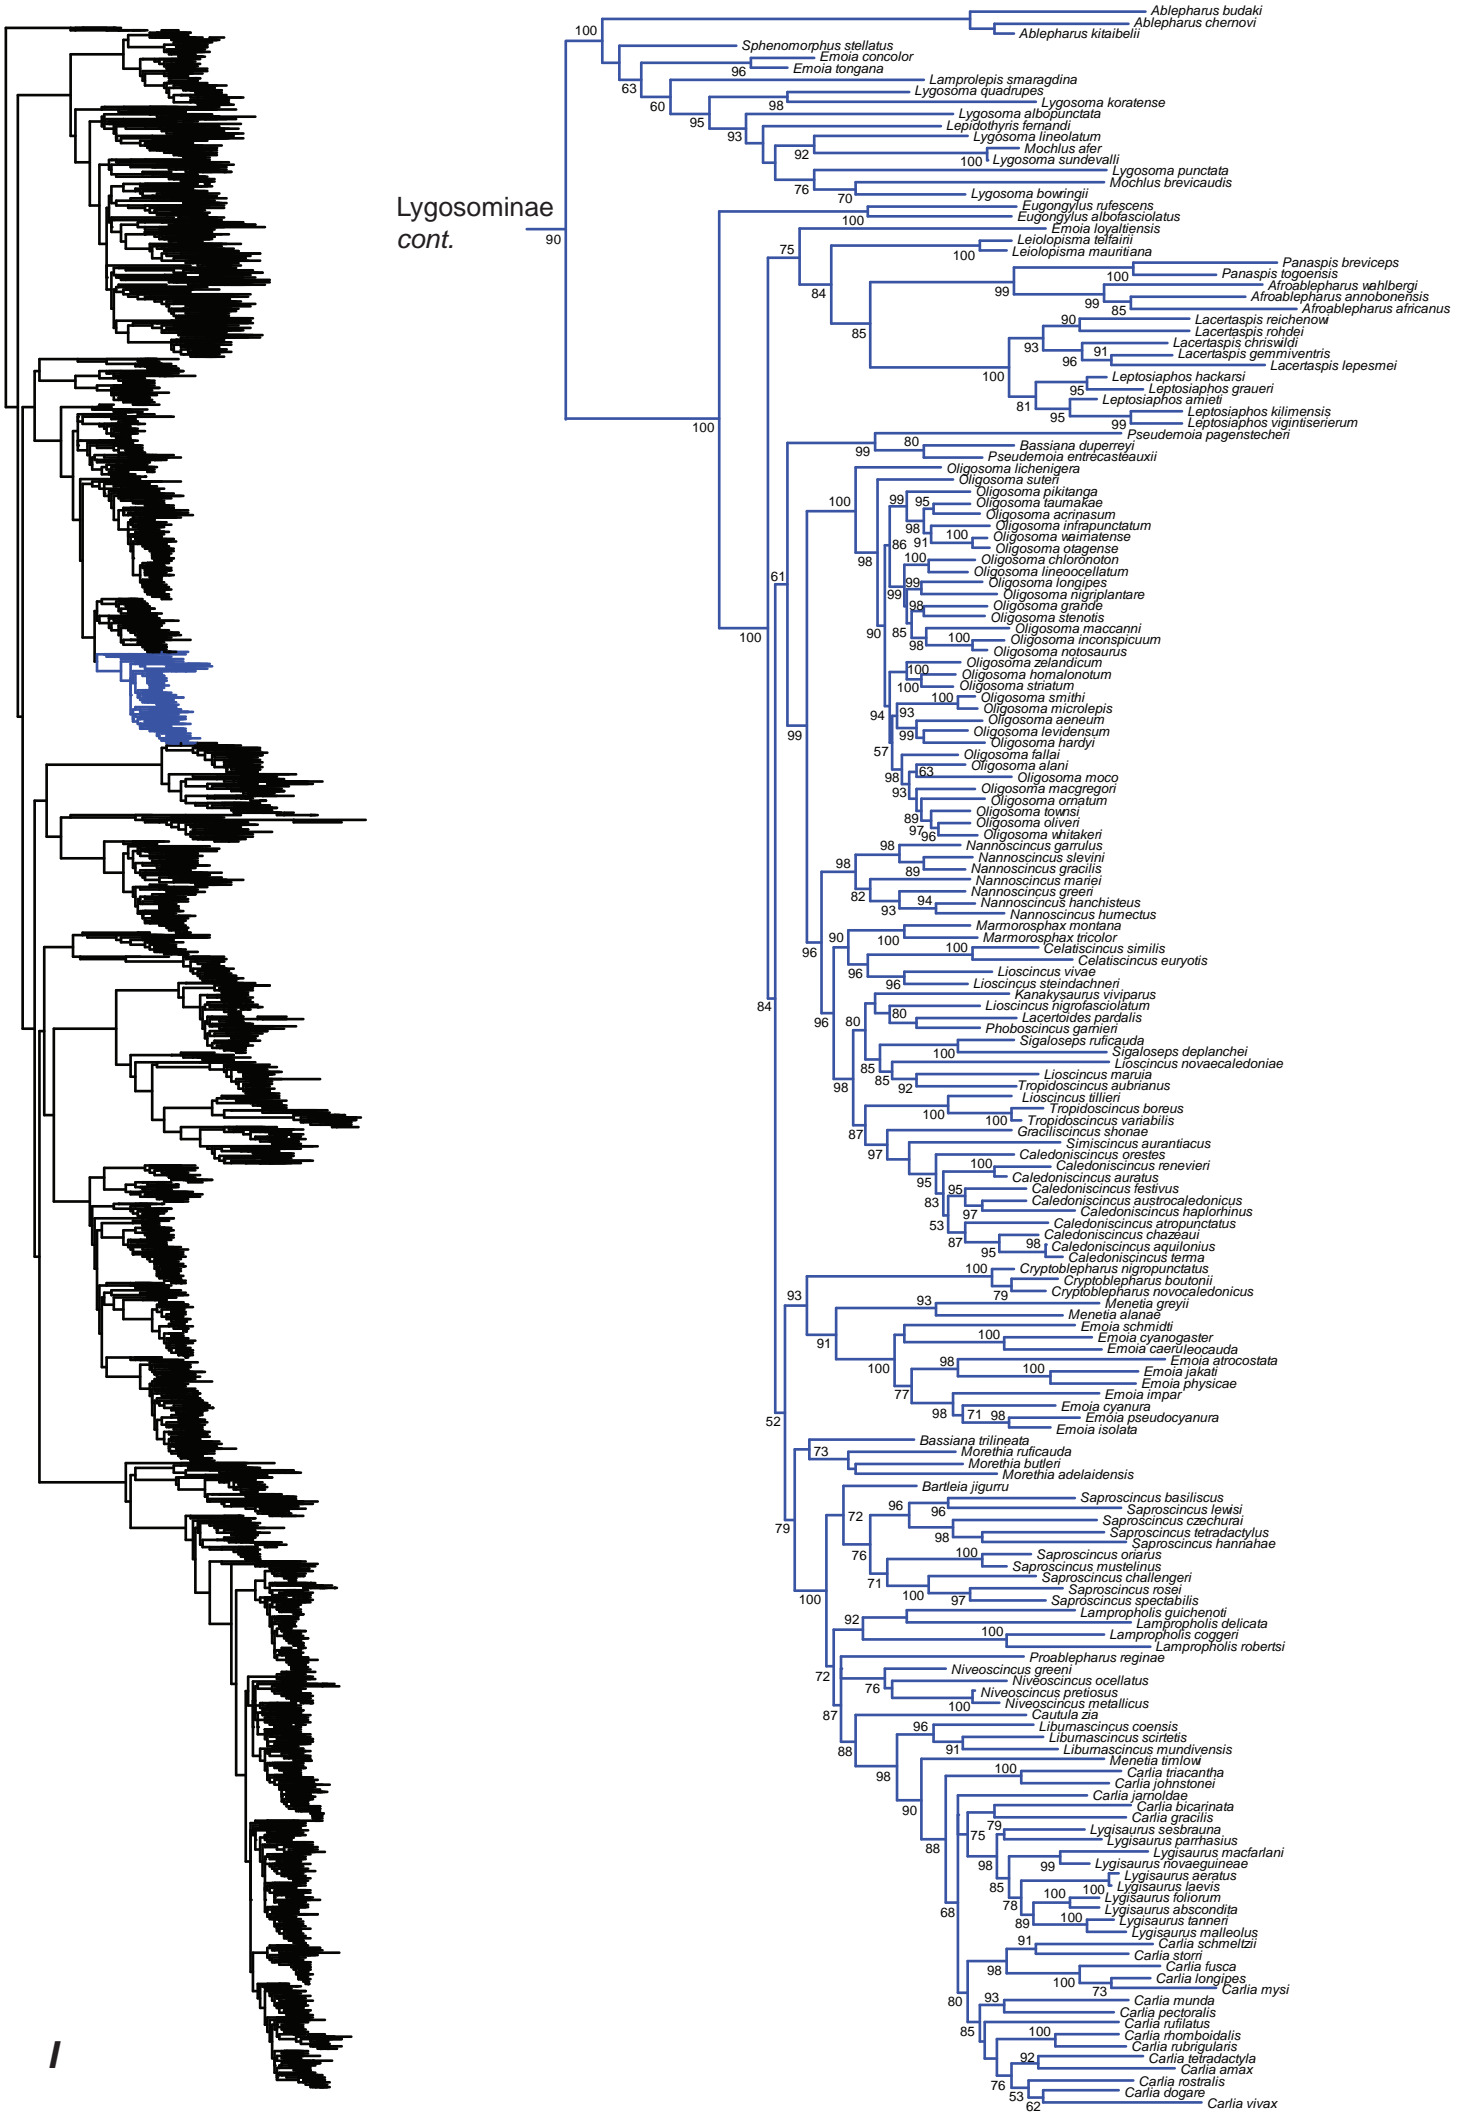

Supplement: 12862_2013_2346_MOESM12_ESM.pdf [file 12862_2013_2346_MOESM12_ESM.pdf]

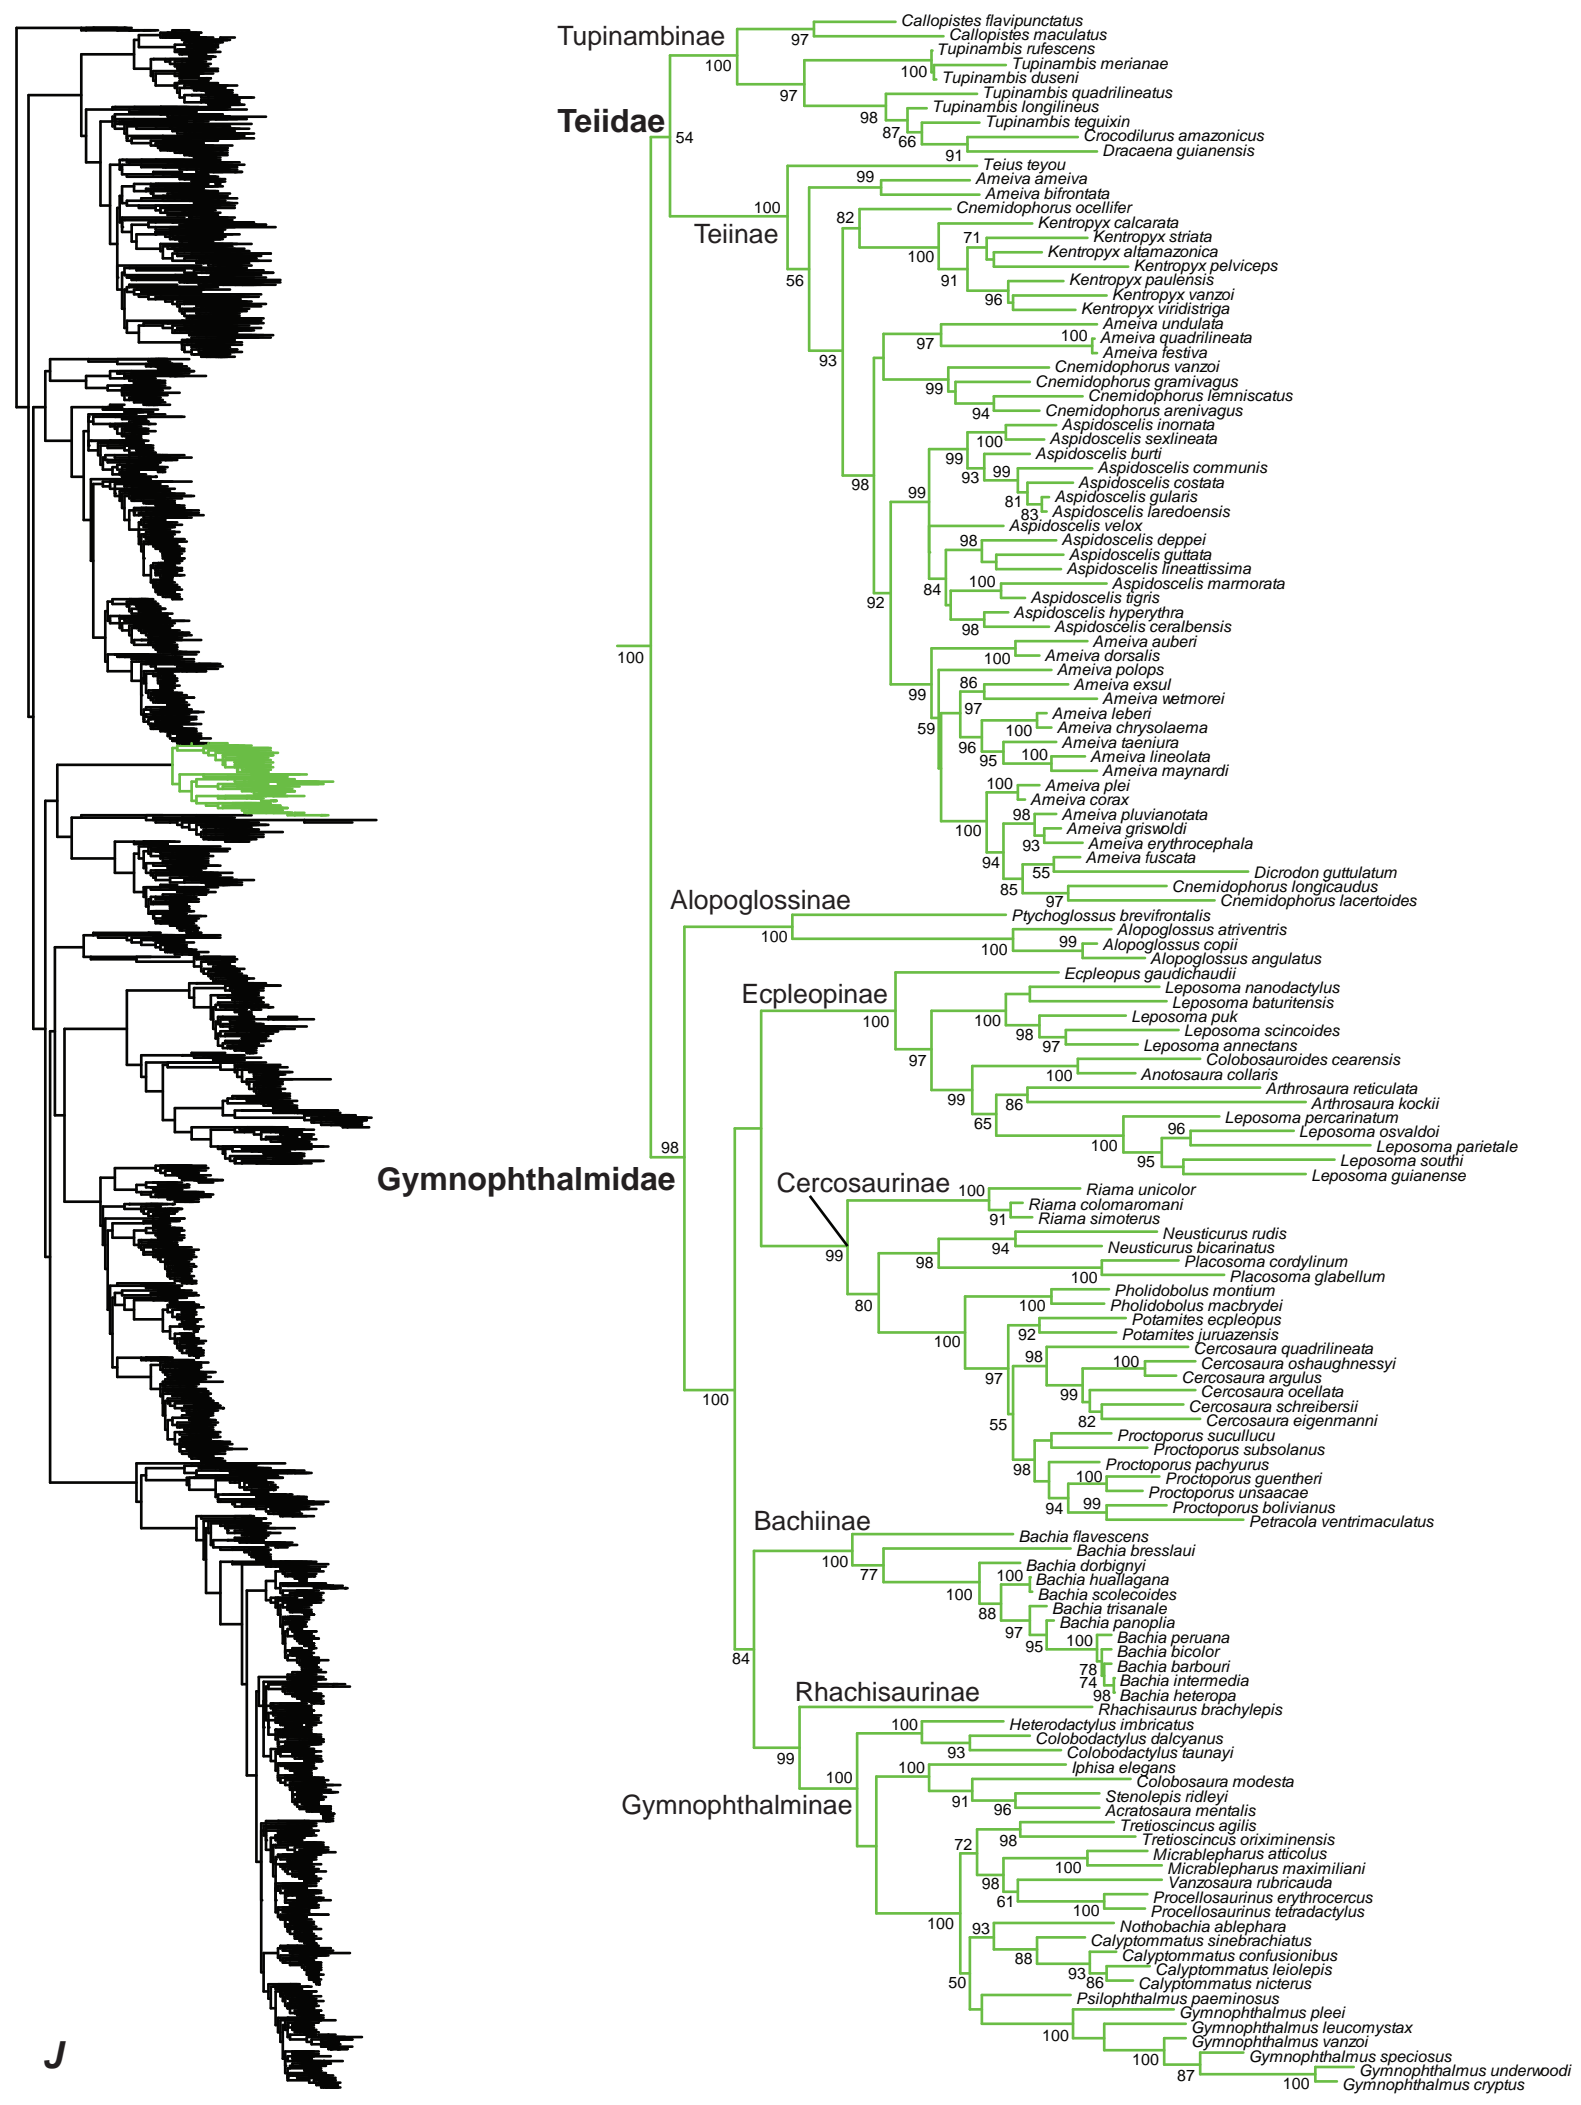

Supplement: 12862_2013_2346_MOESM13_ESM.pdf [file 12862_2013_2346_MOESM13_ESM.pdf]

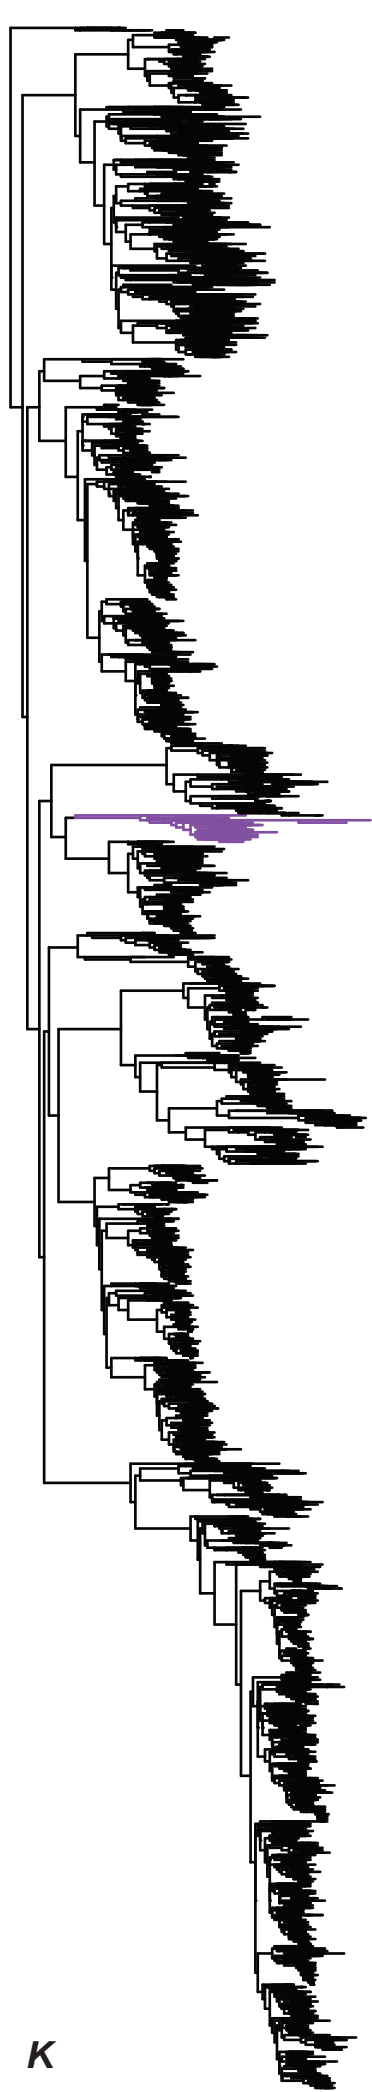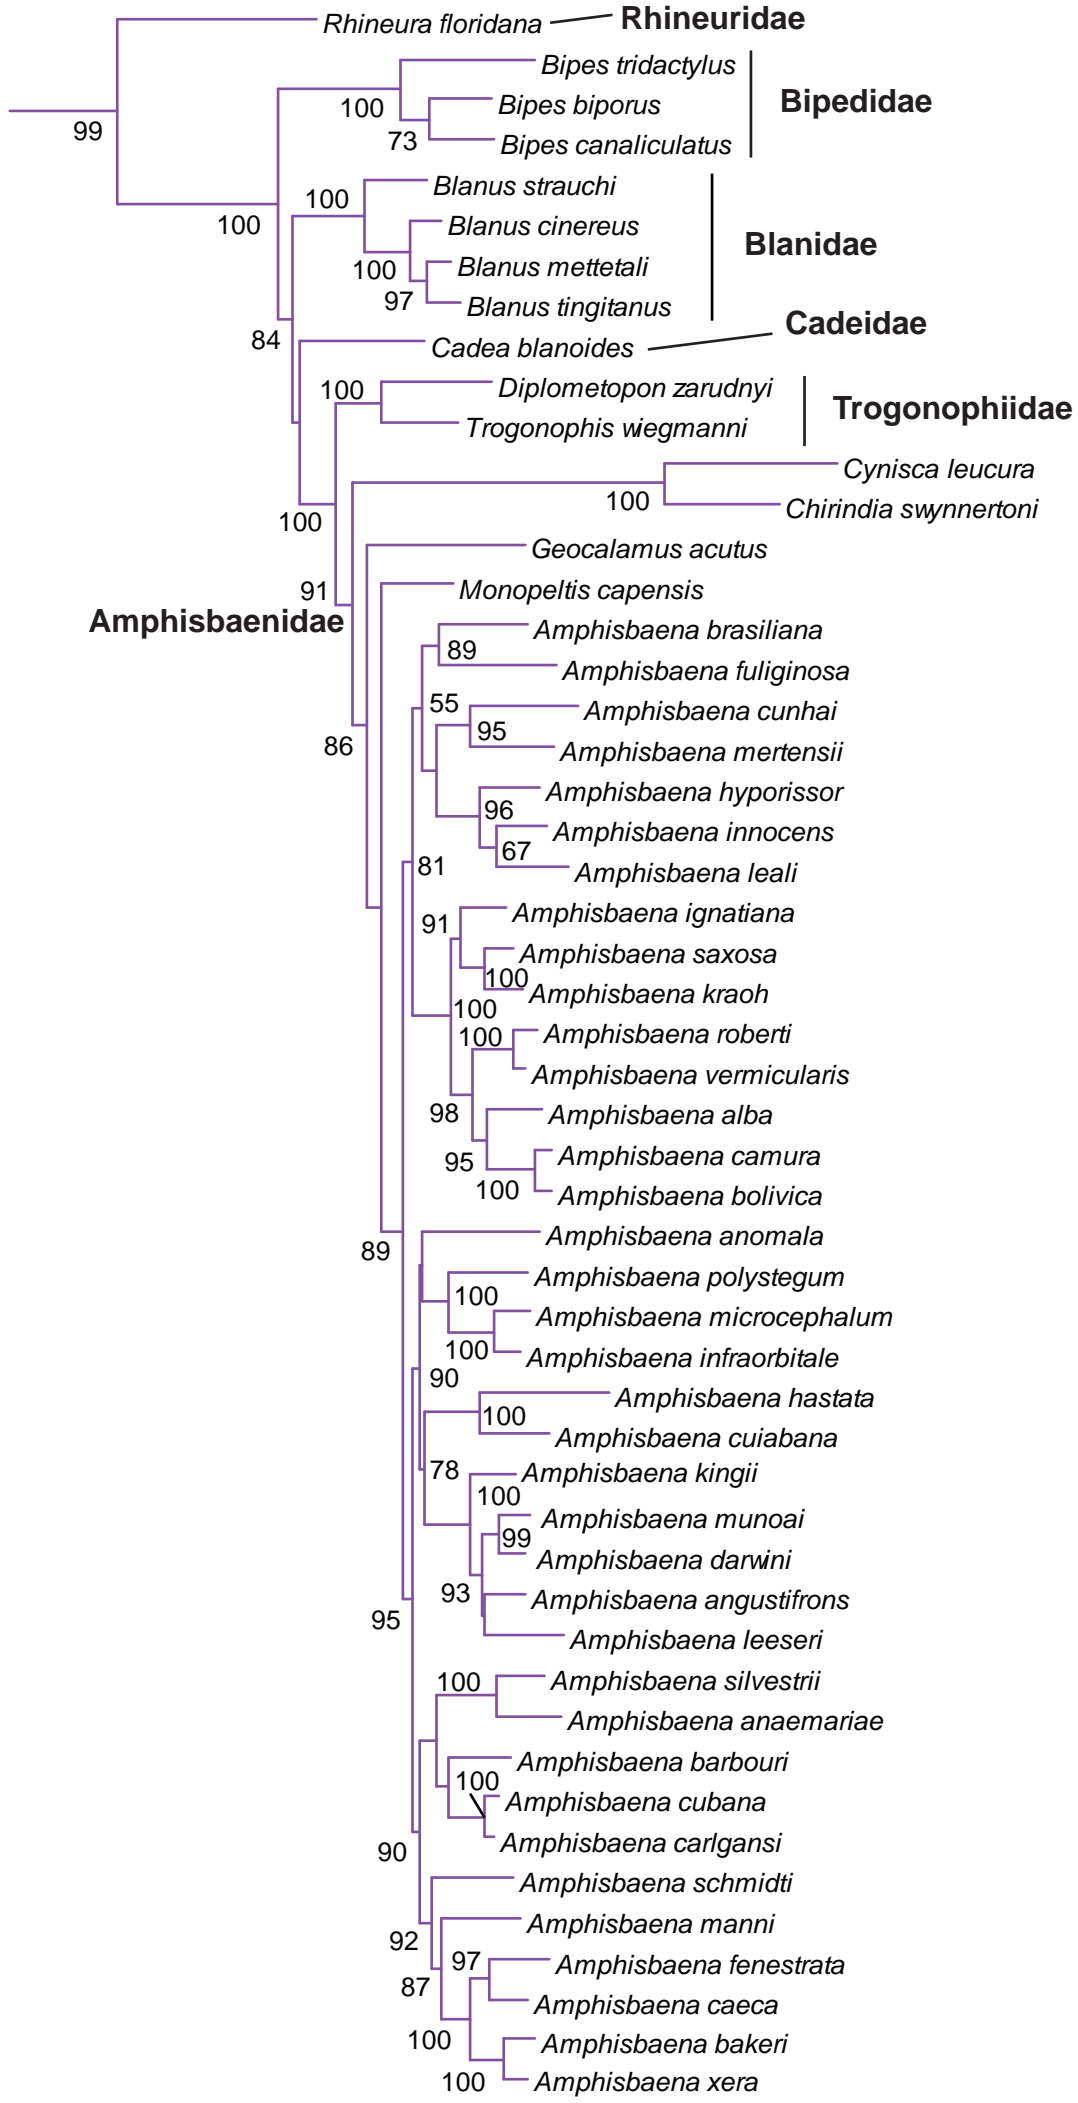

K

Supplement: 12862_2013_2346_MOESM14_ESM.pdf [file 12862_2013_2346_MOESM14_ESM.pdf]

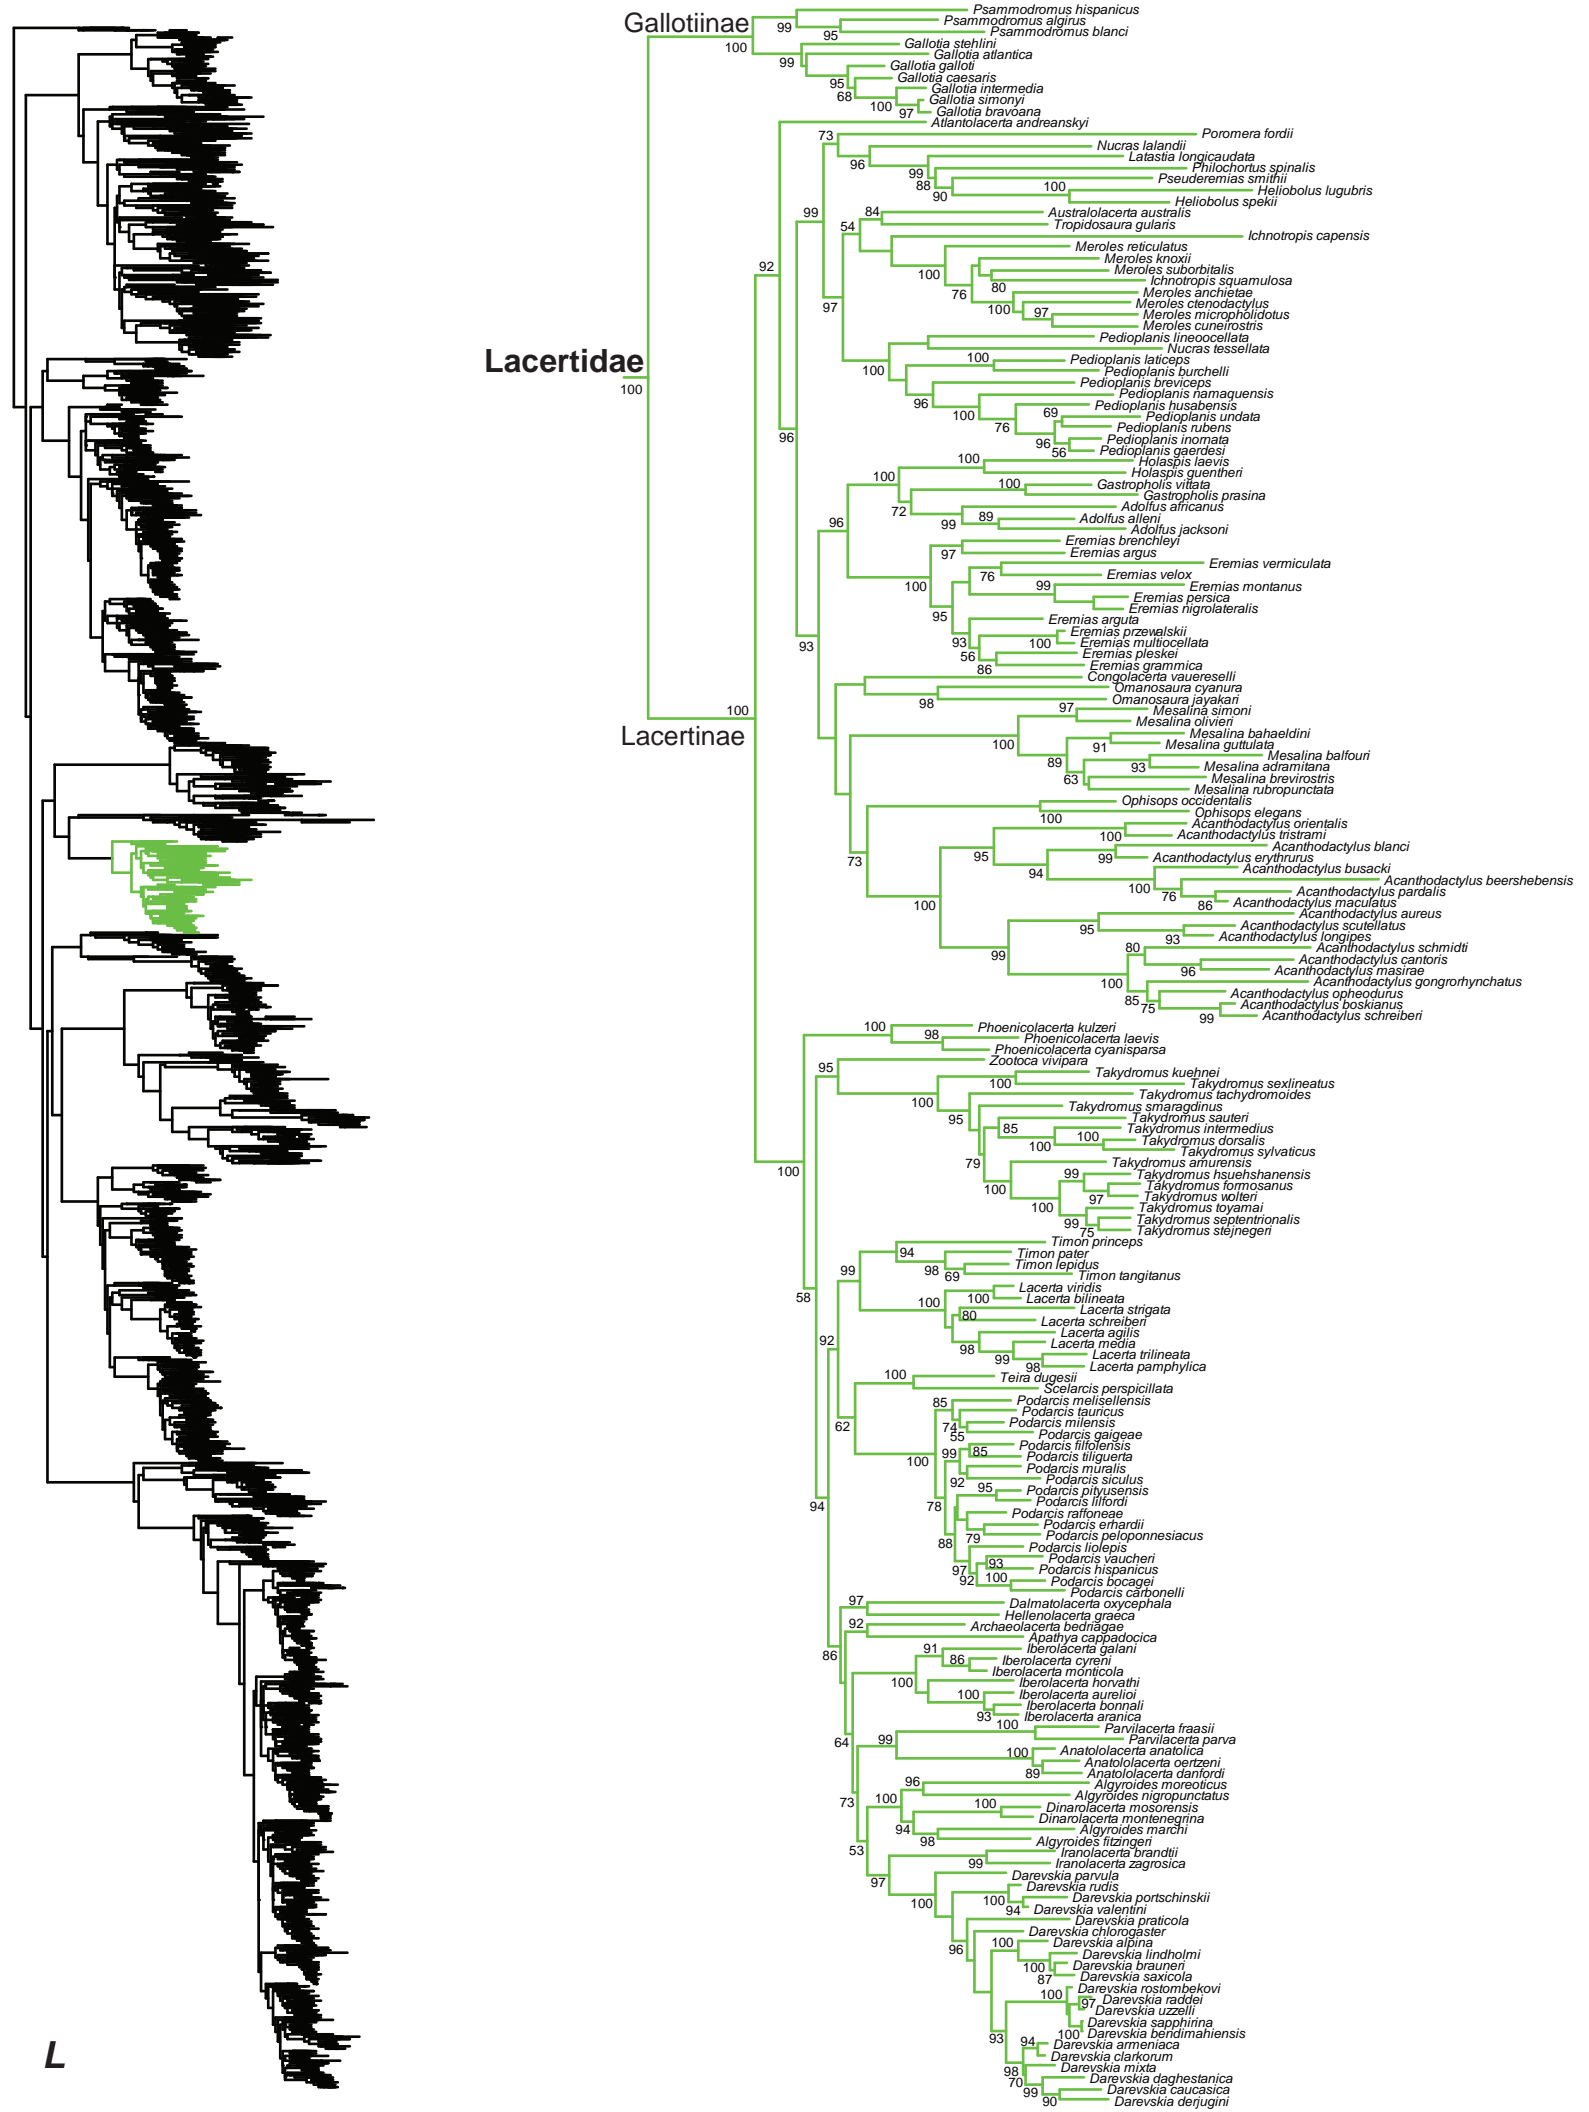

L

Supplement: 12862_2013_2346_MOESM15_ESM.pdf [file 12862_2013_2346_MOESM15_ESM.pdf]

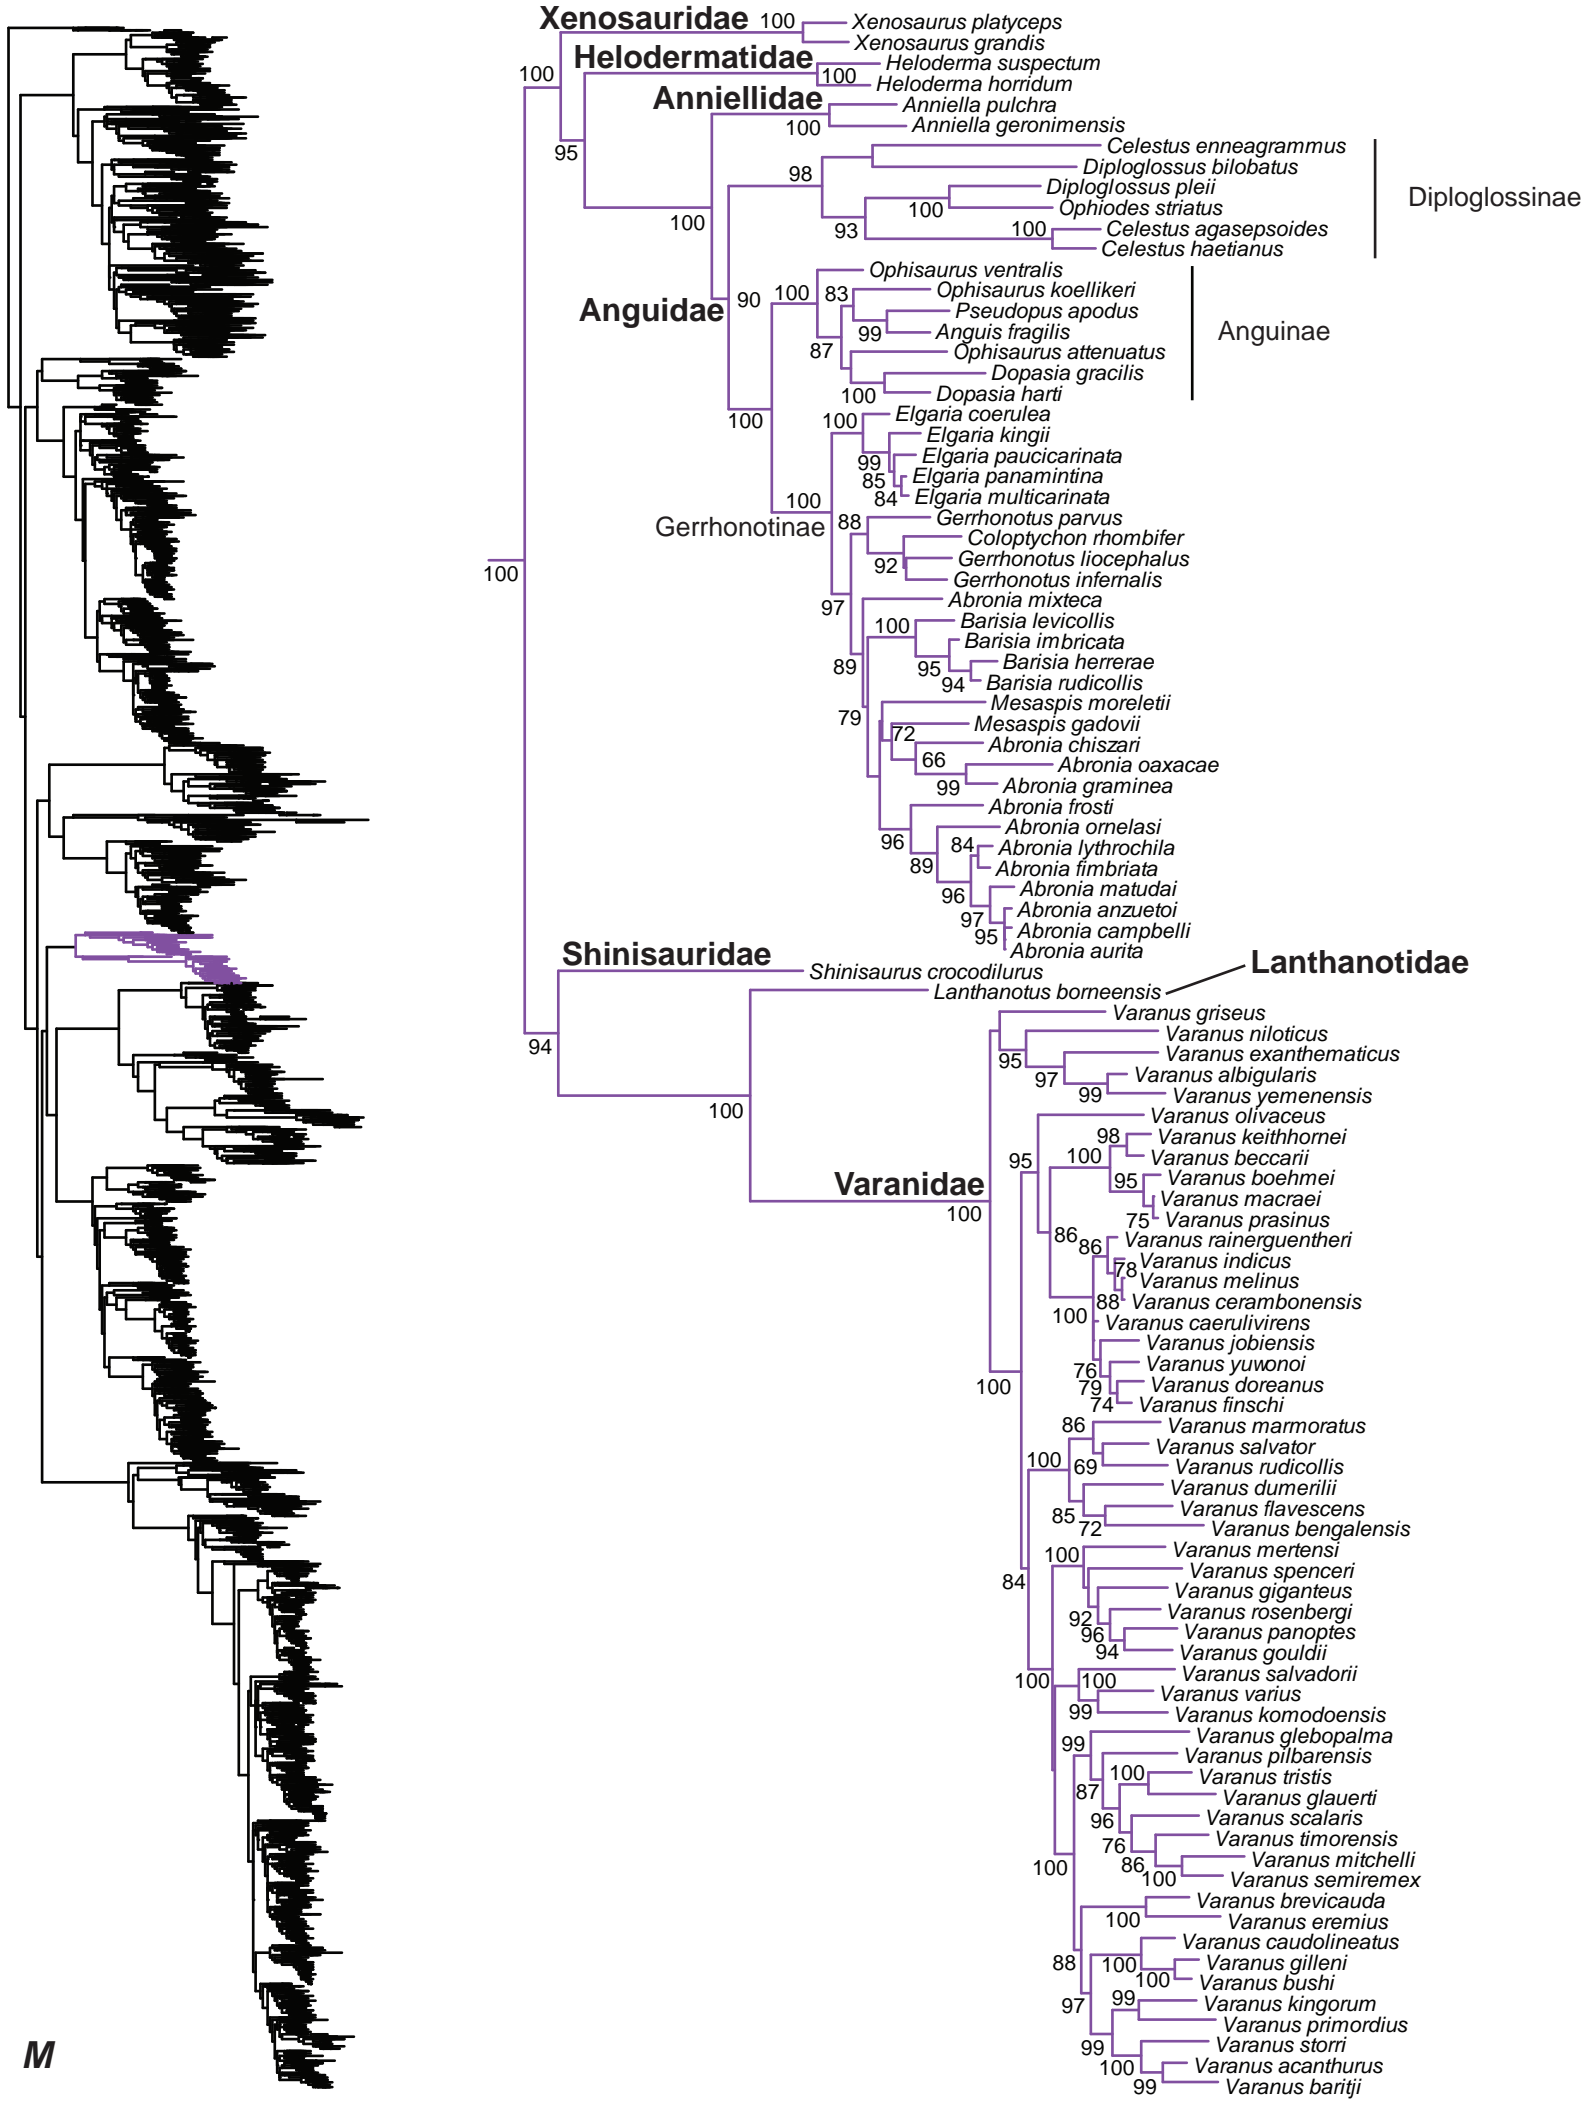

Supplement: 12862_2013_2346_MOESM16_ESM.pdf [file 12862_2013_2346_MOESM16_ESM.pdf]

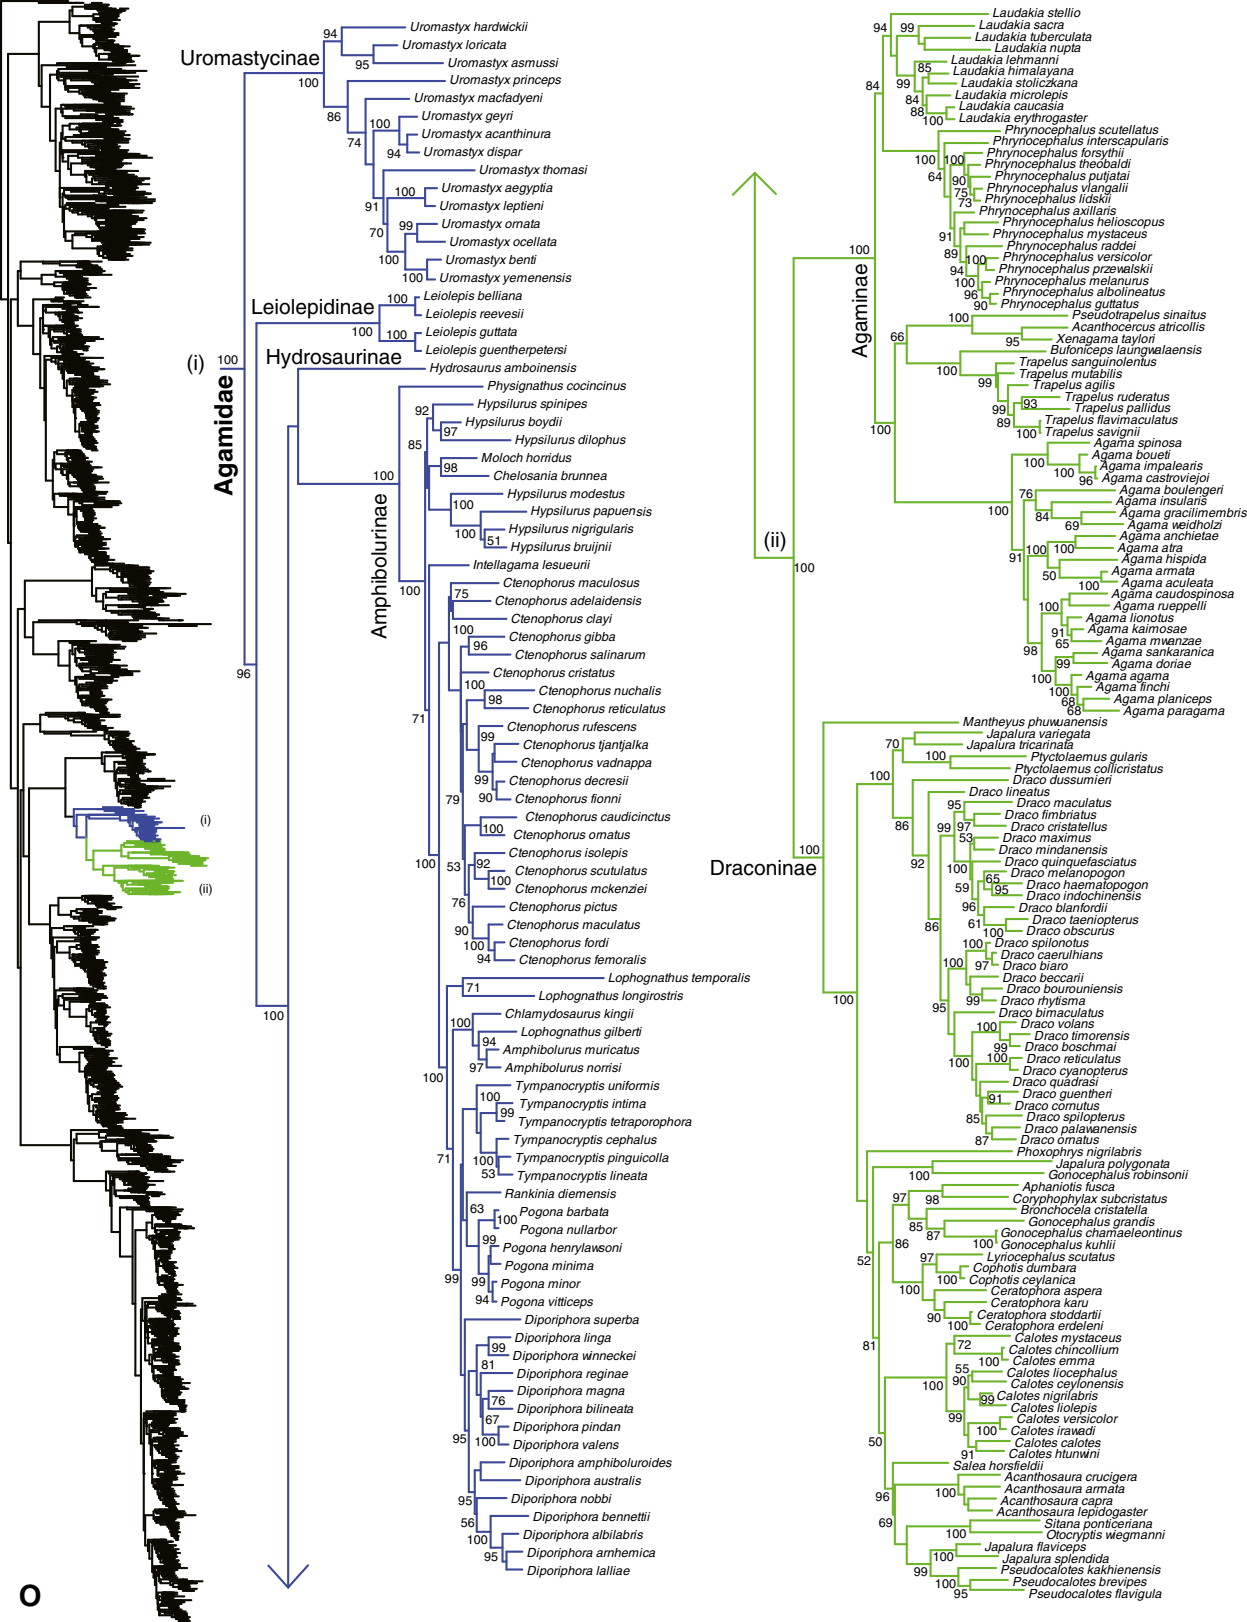

Supplement: 12862_2013_2346_MOESM18_ESM.pdf [file 12862_2013_2346_MOESM18_ESM.pdf]

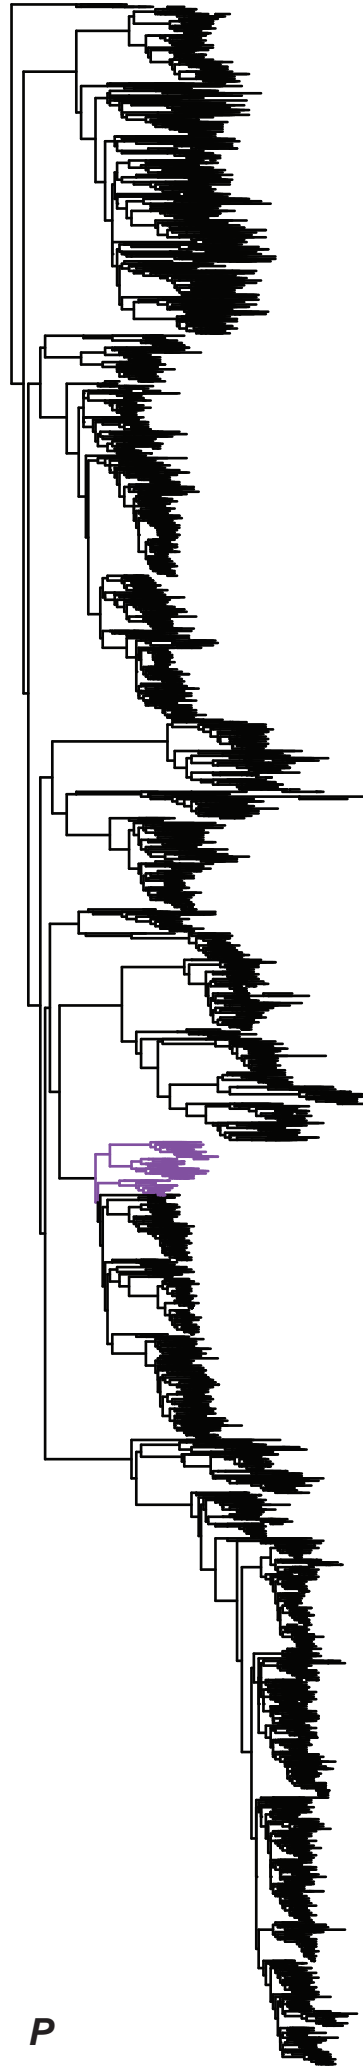

P

**Tropiduridae**

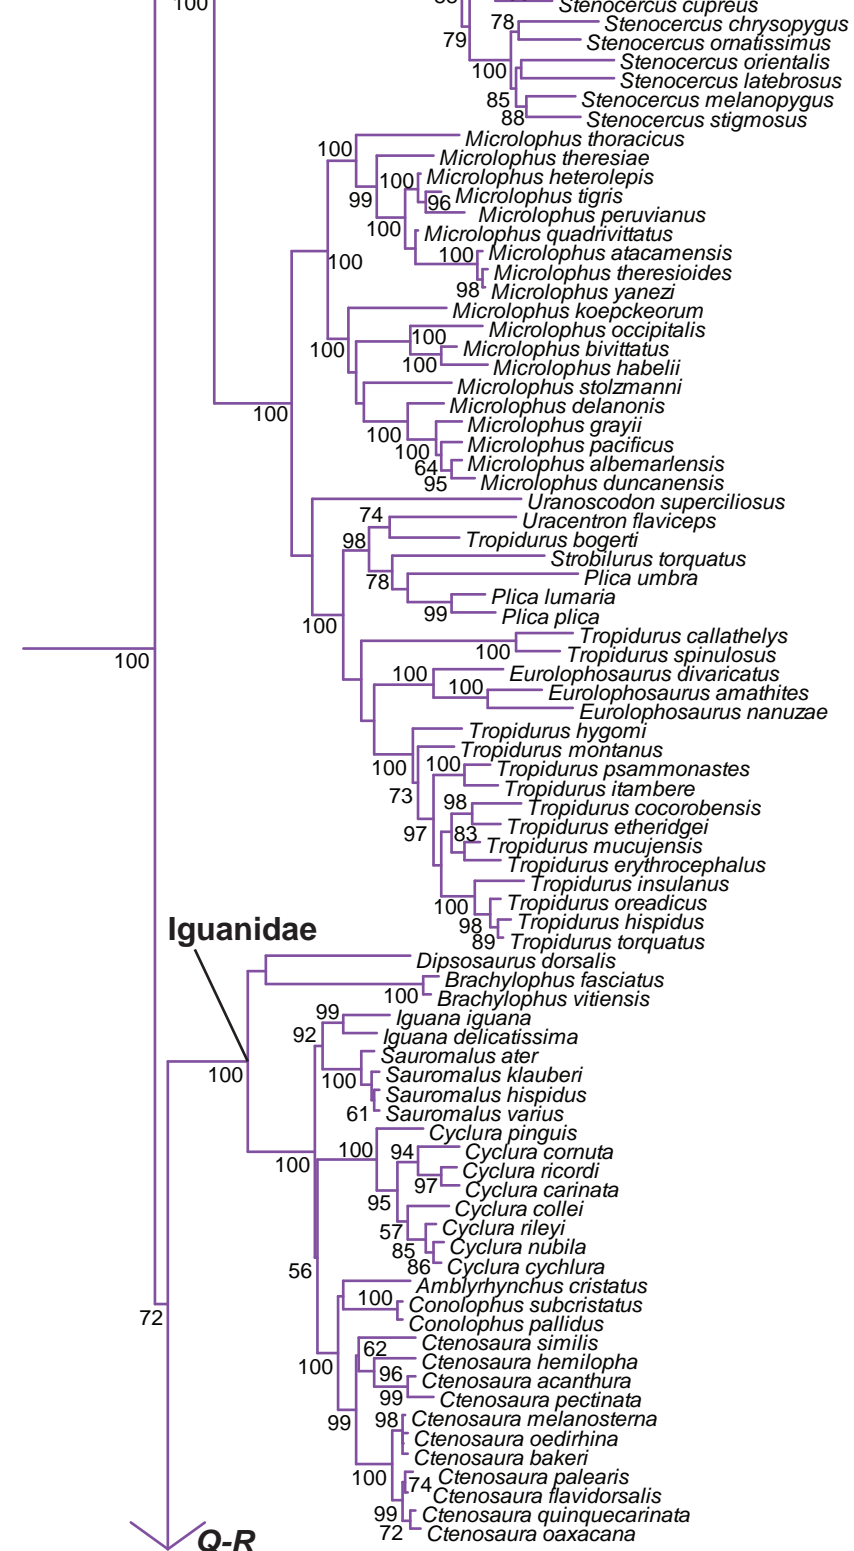

**Iguanidae**

Q-R

Supplement: 12862_2013_2346_MOESM19_ESM.pdf [file 12862_2013_2346_MOESM19_ESM.pdf]

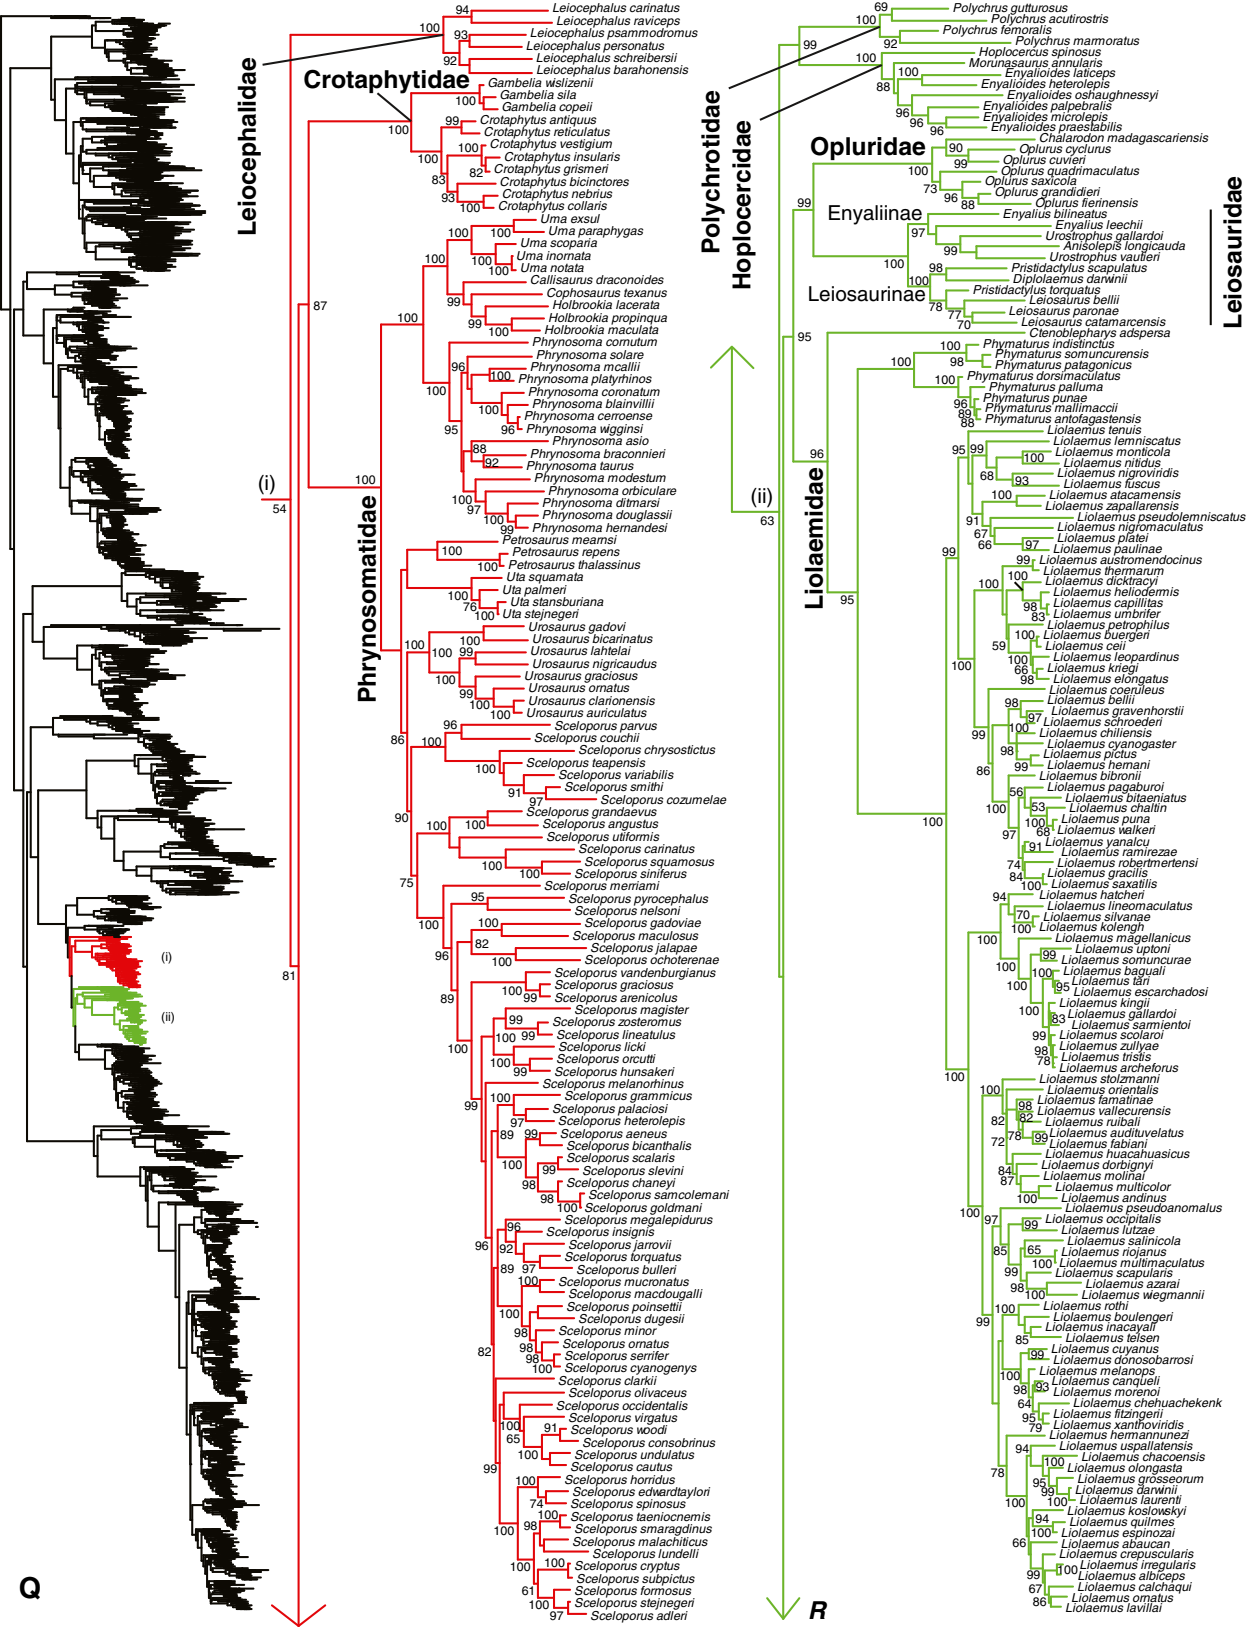

Supplement: 12862_2013_2346_MOESM20_ESM.pdf [file 12862_2013_2346_MOESM20_ESM.pdf]

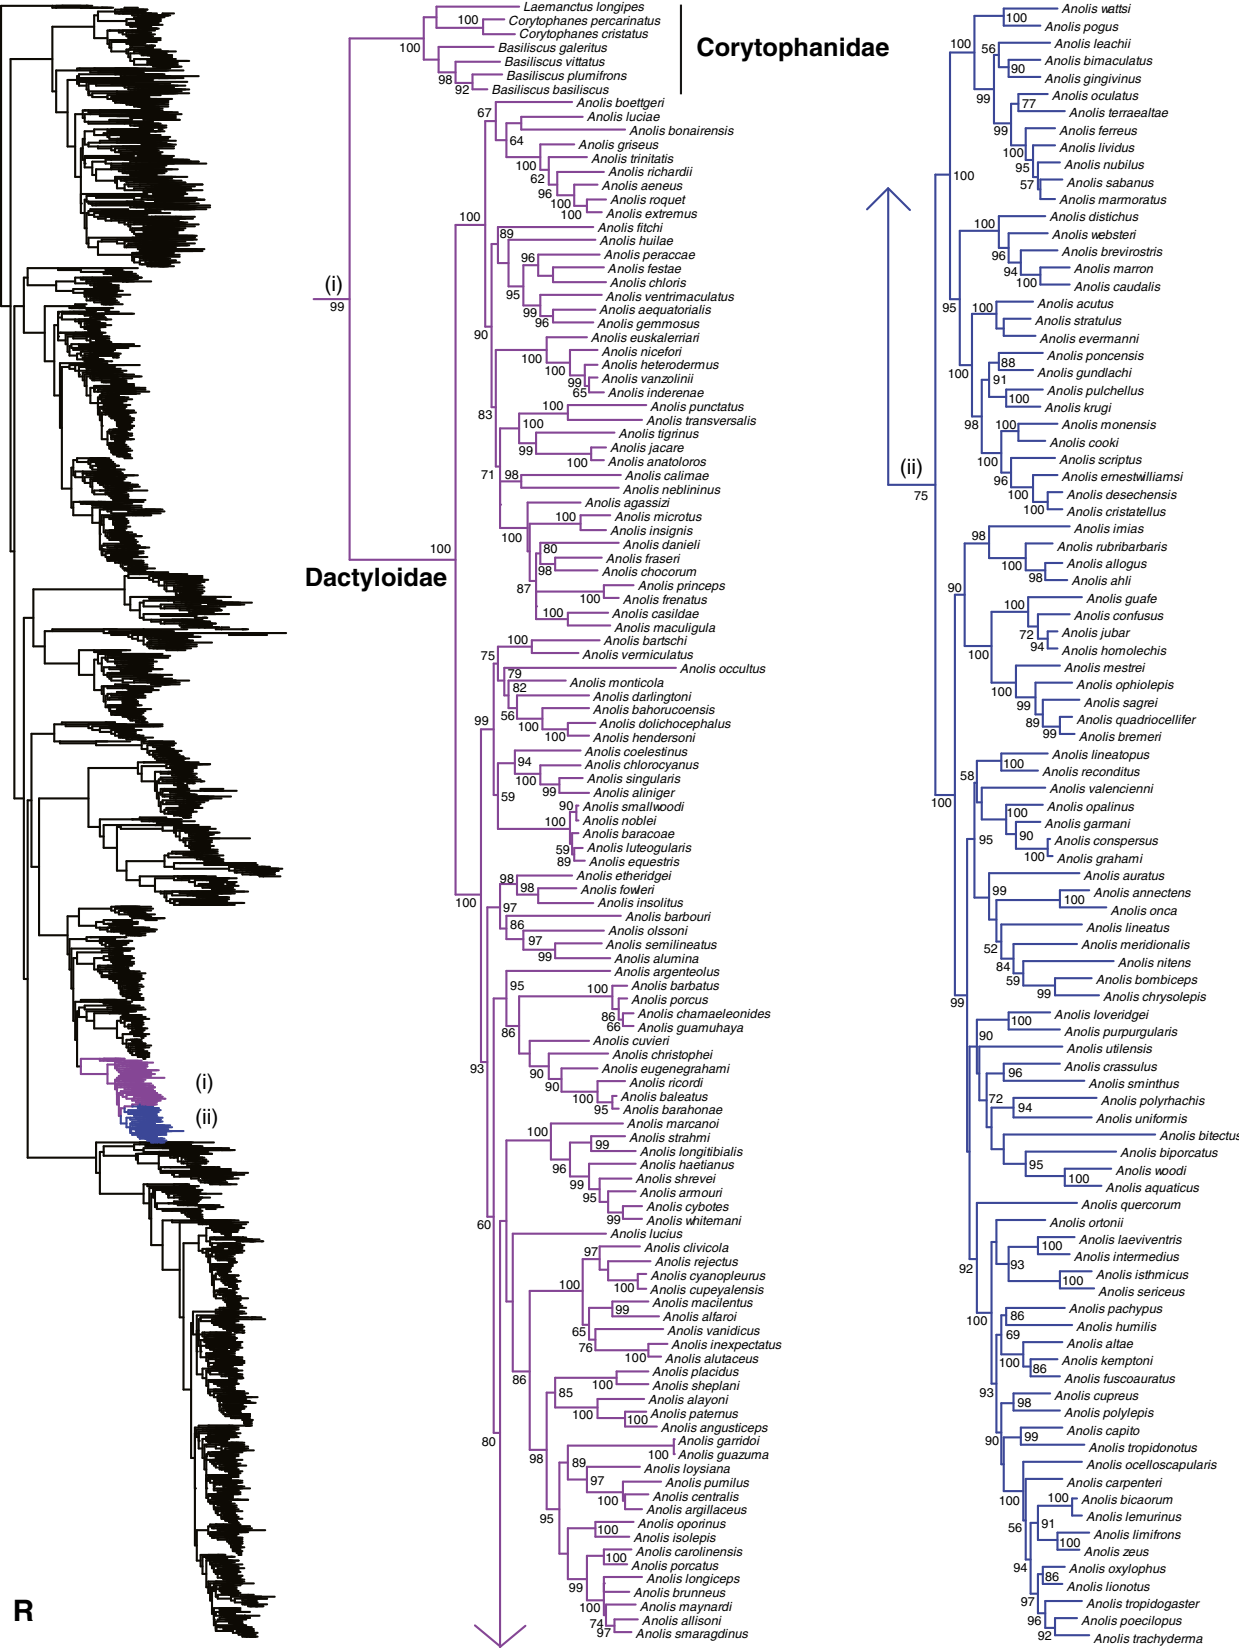

Supplement: 12862_2013_2346_MOESM21_ESM.pdf [file 12862_2013_2346_MOESM21_ESM.pdf]

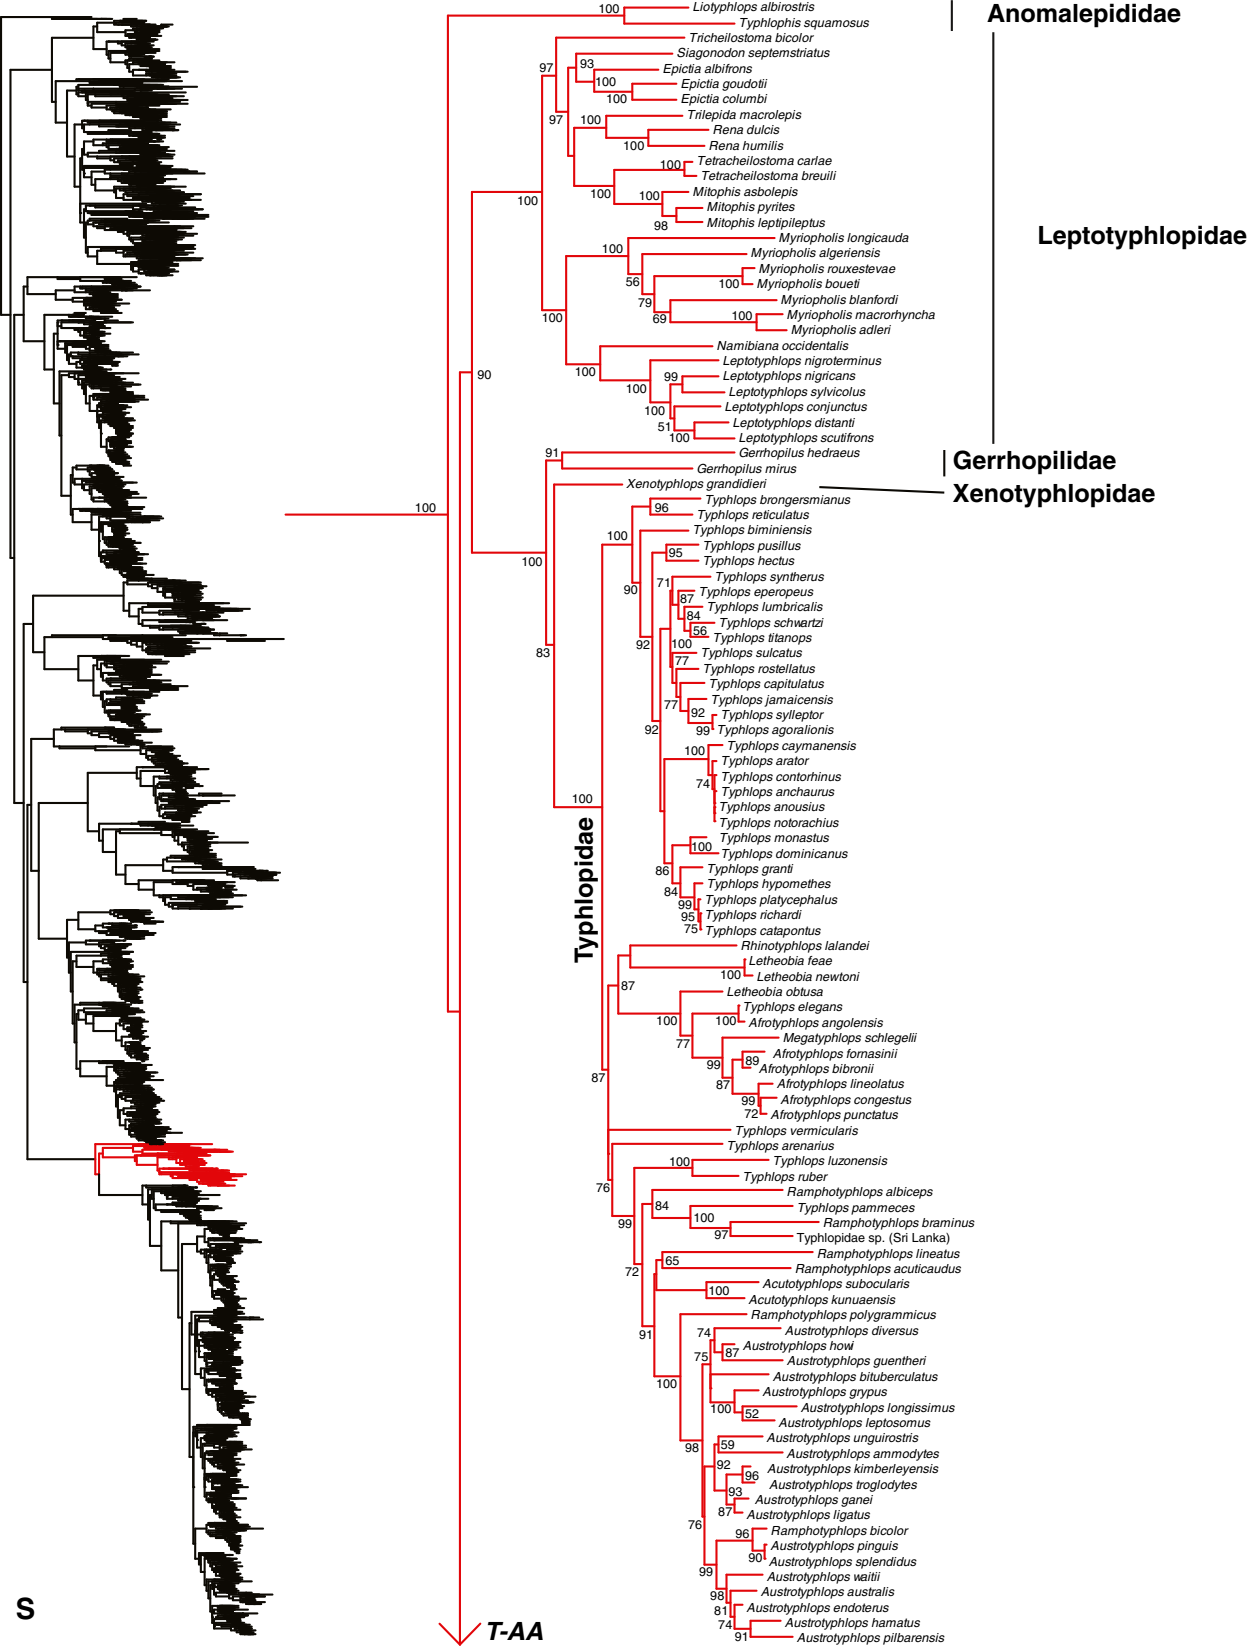

Supplement: 12862_2013_2346_MOESM22_ESM.pdf [file 12862_2013_2346_MOESM22_ESM.pdf]

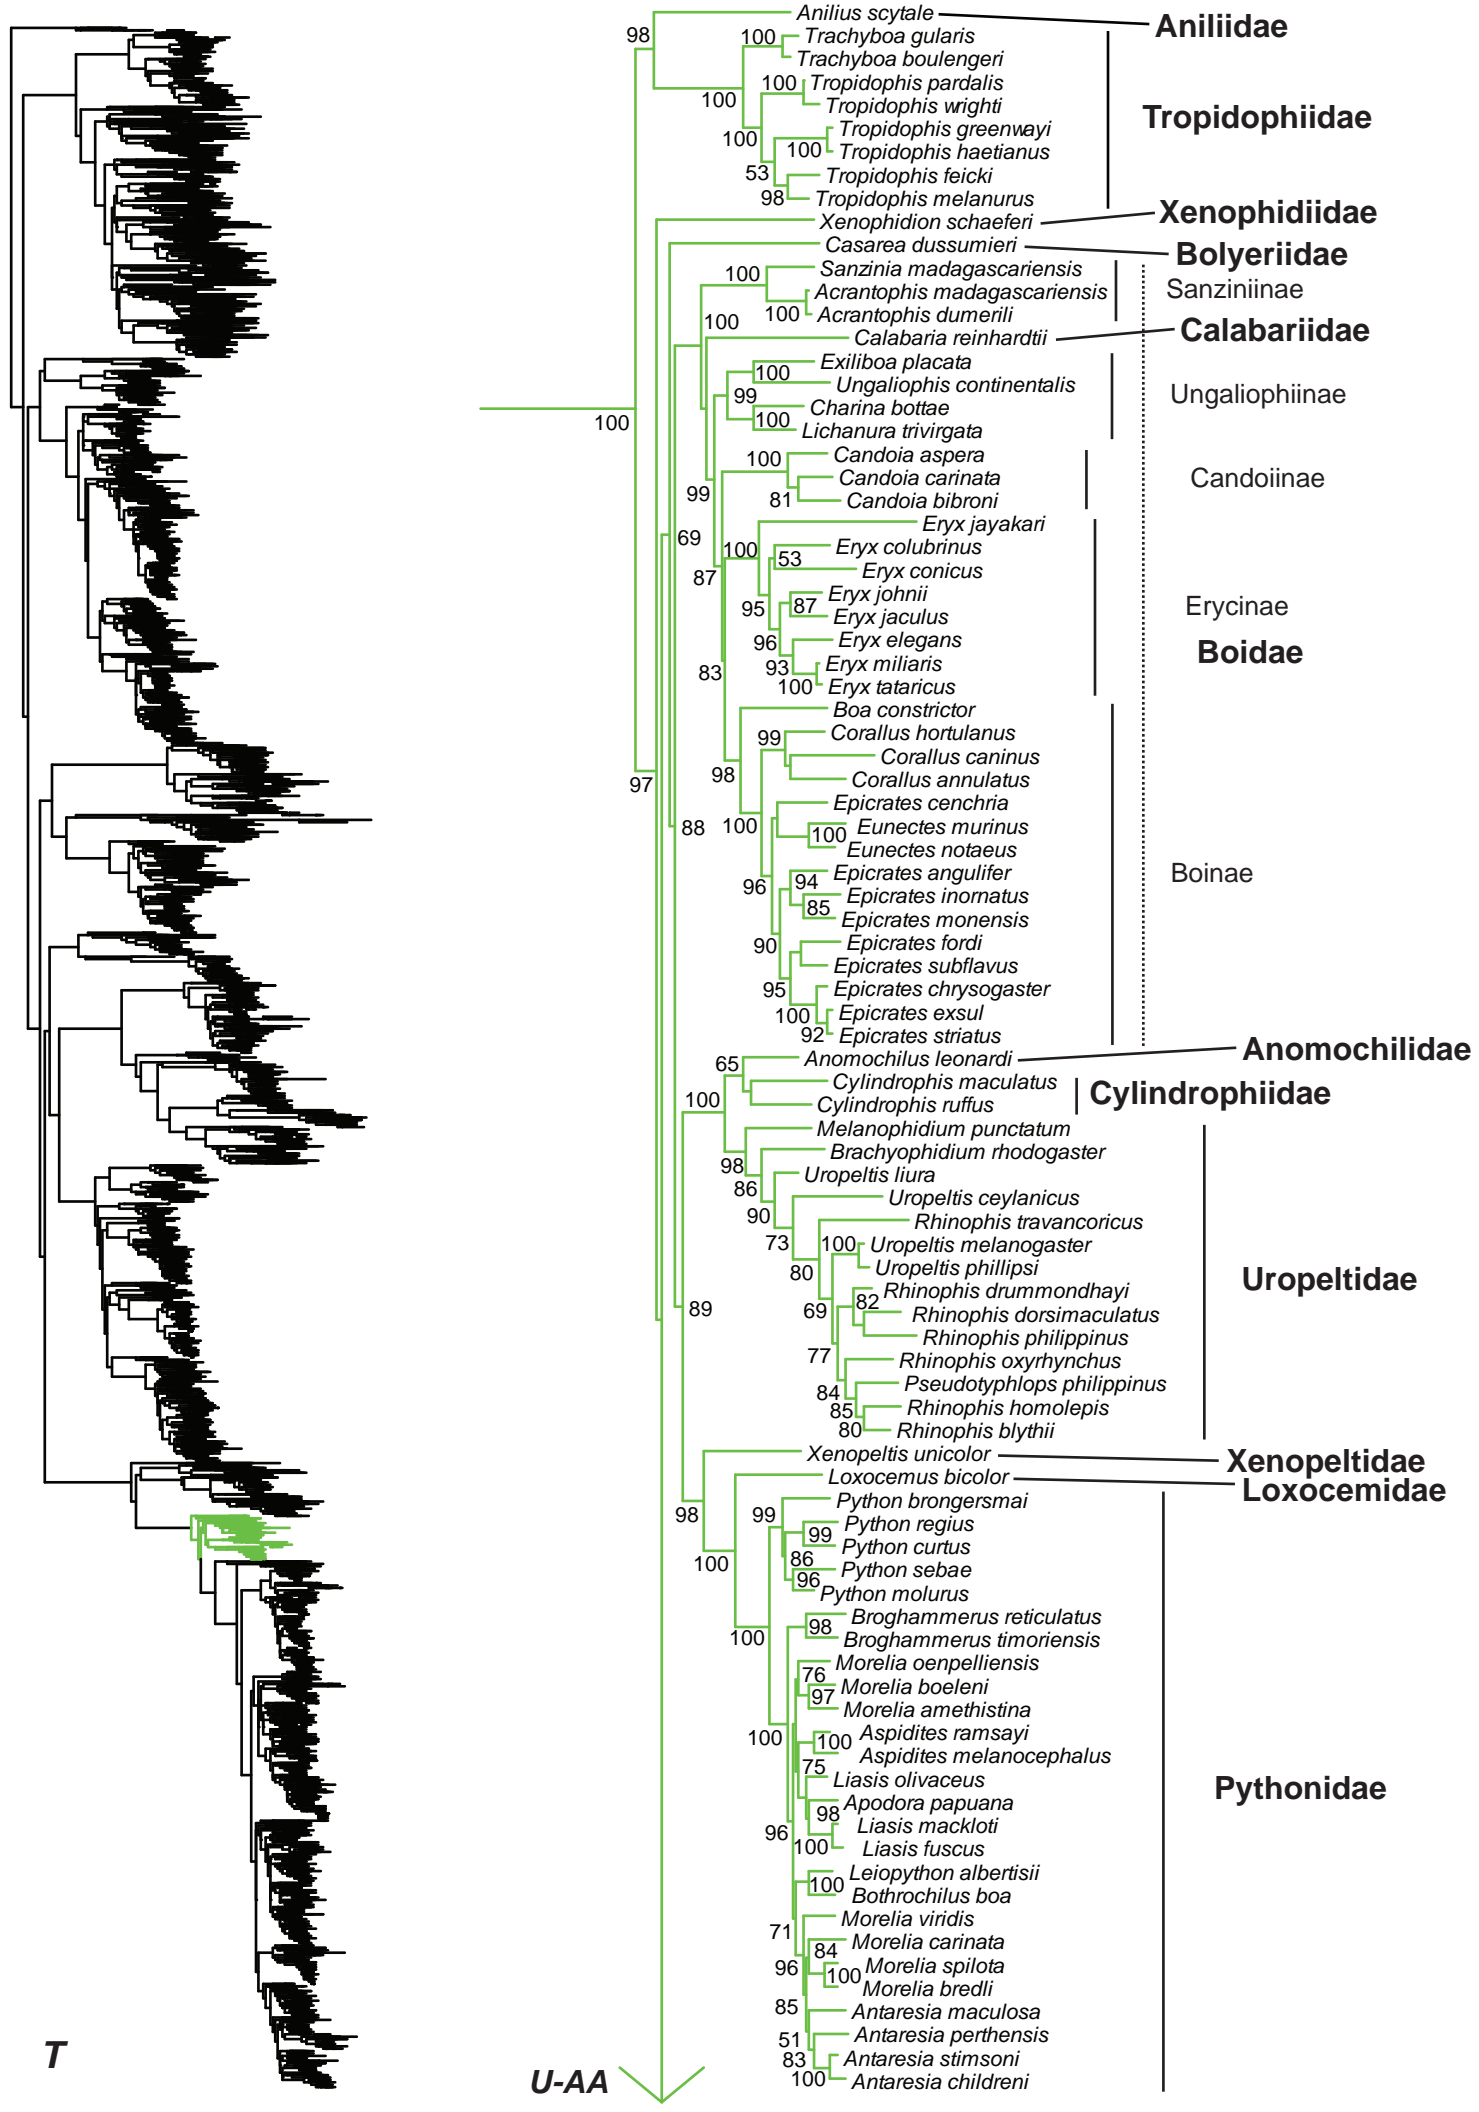

Supplement: 12862_2013_2346_MOESM23_ESM.pdf [file 12862_2013_2346_MOESM23_ESM.pdf]

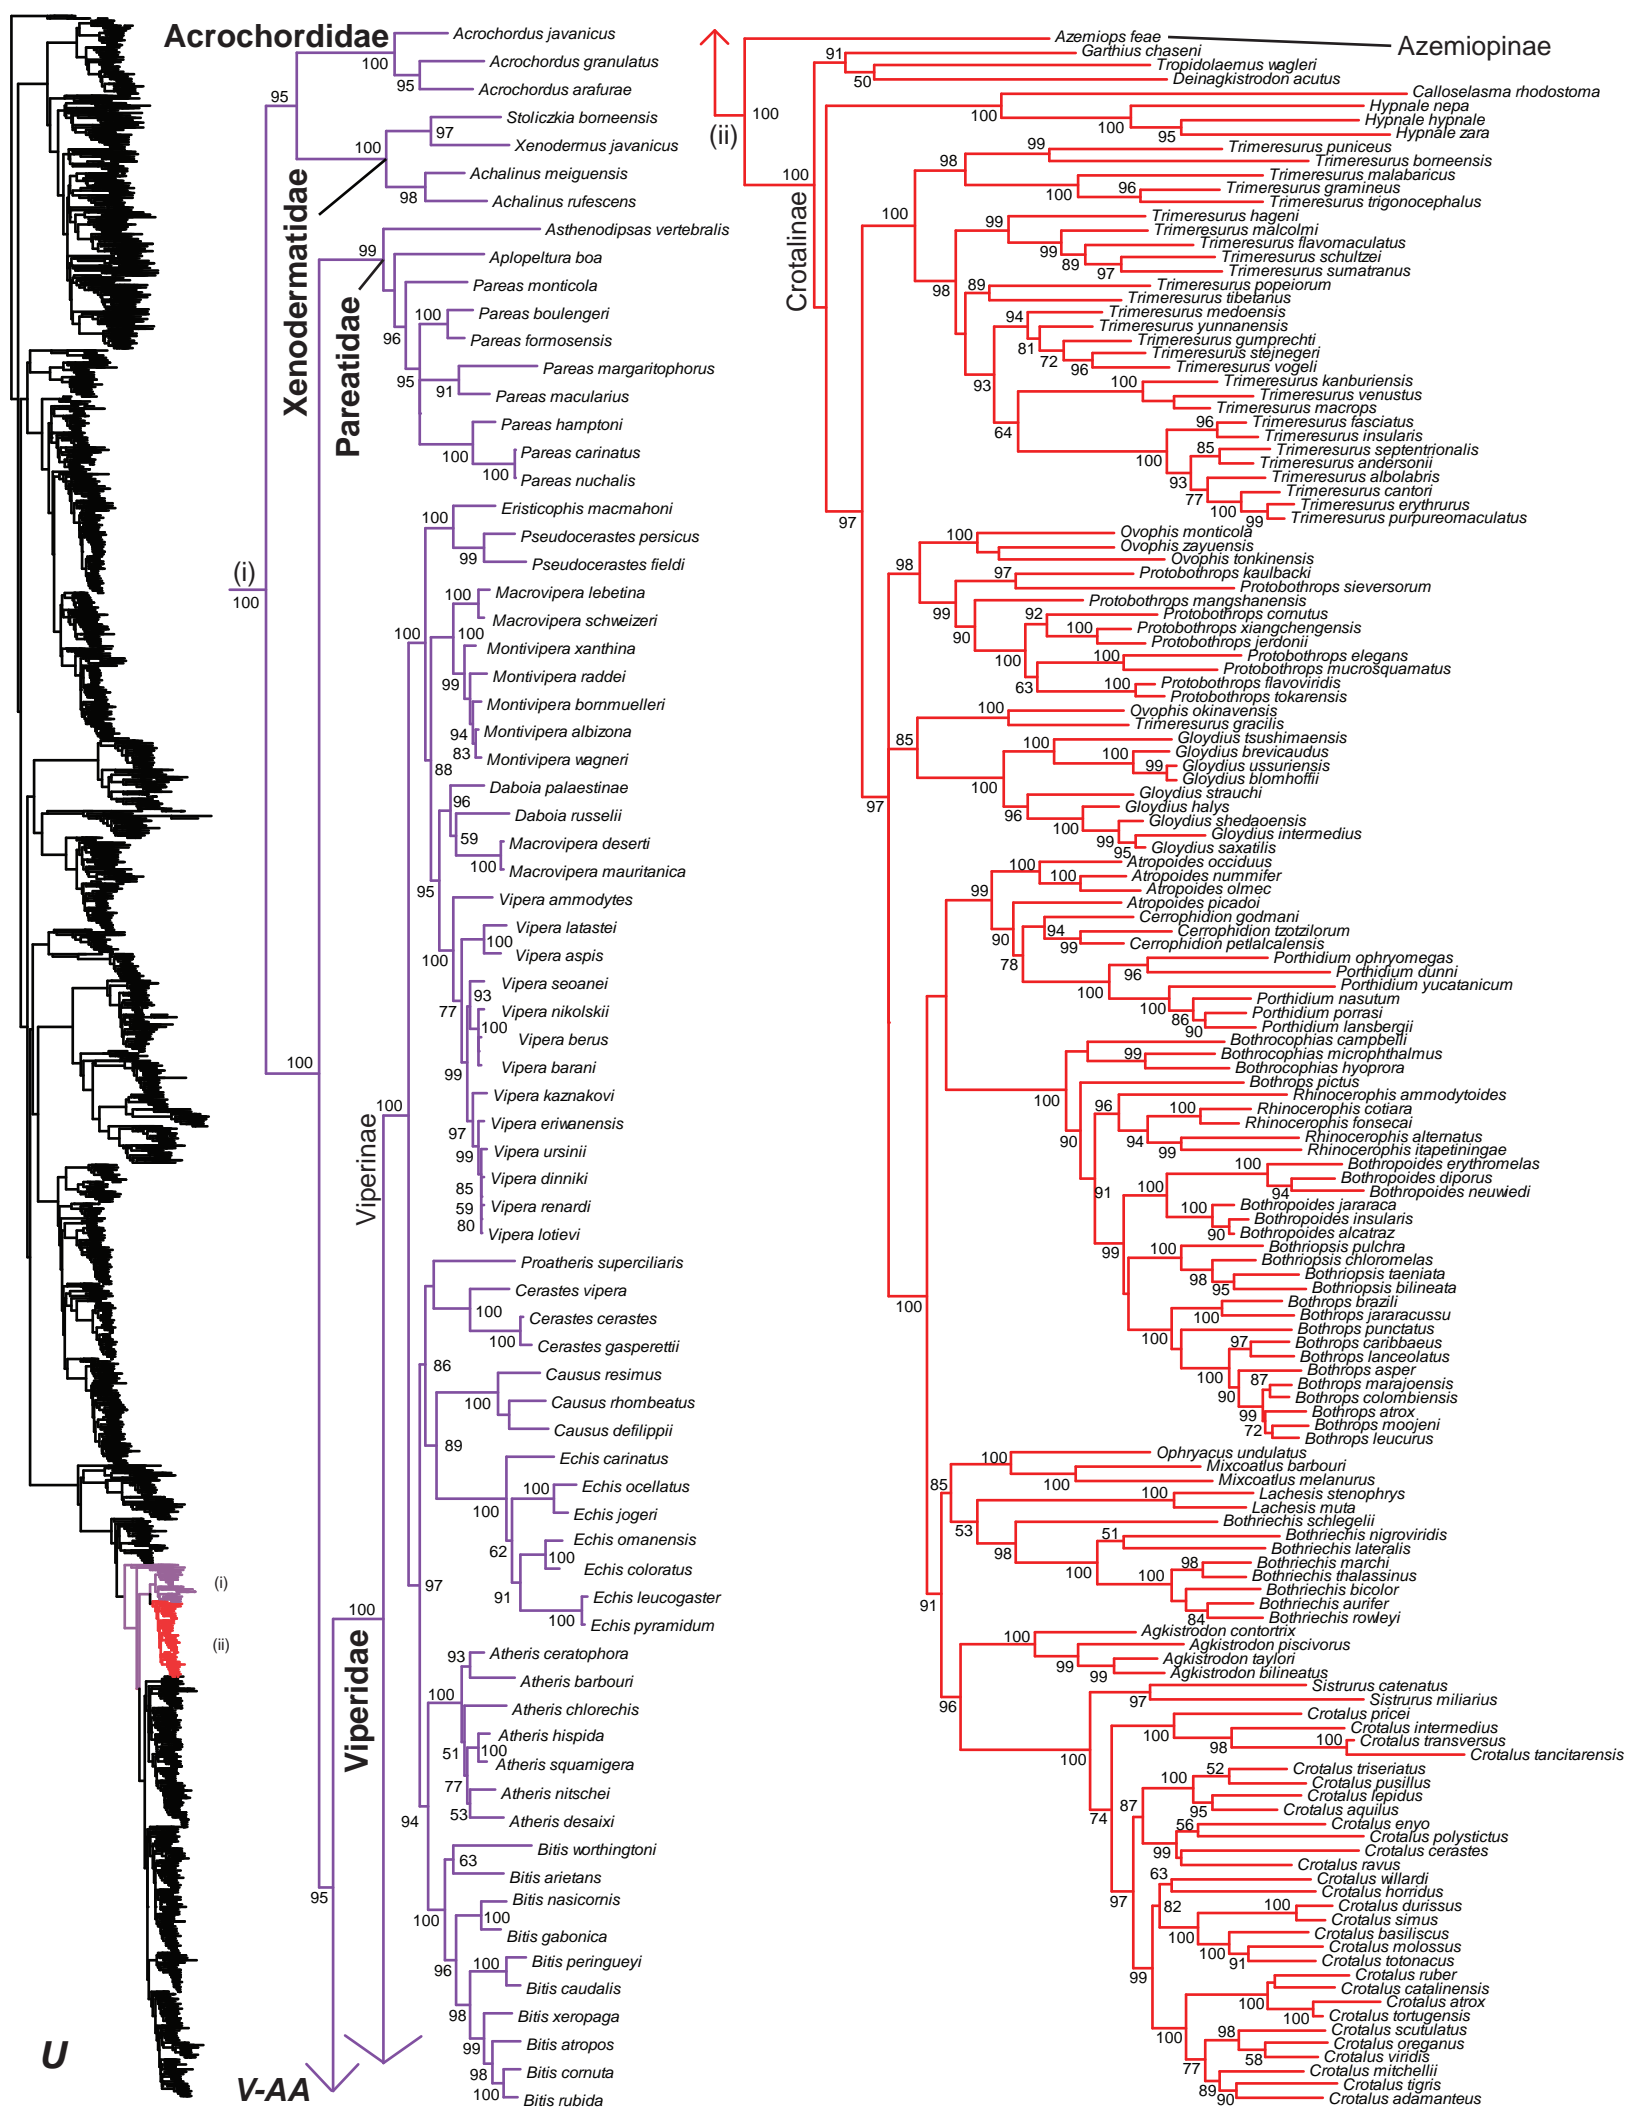

Supplement: 12862_2013_2346_MOESM24_ESM.pdf [file 12862_2013_2346_MOESM24_ESM.pdf]

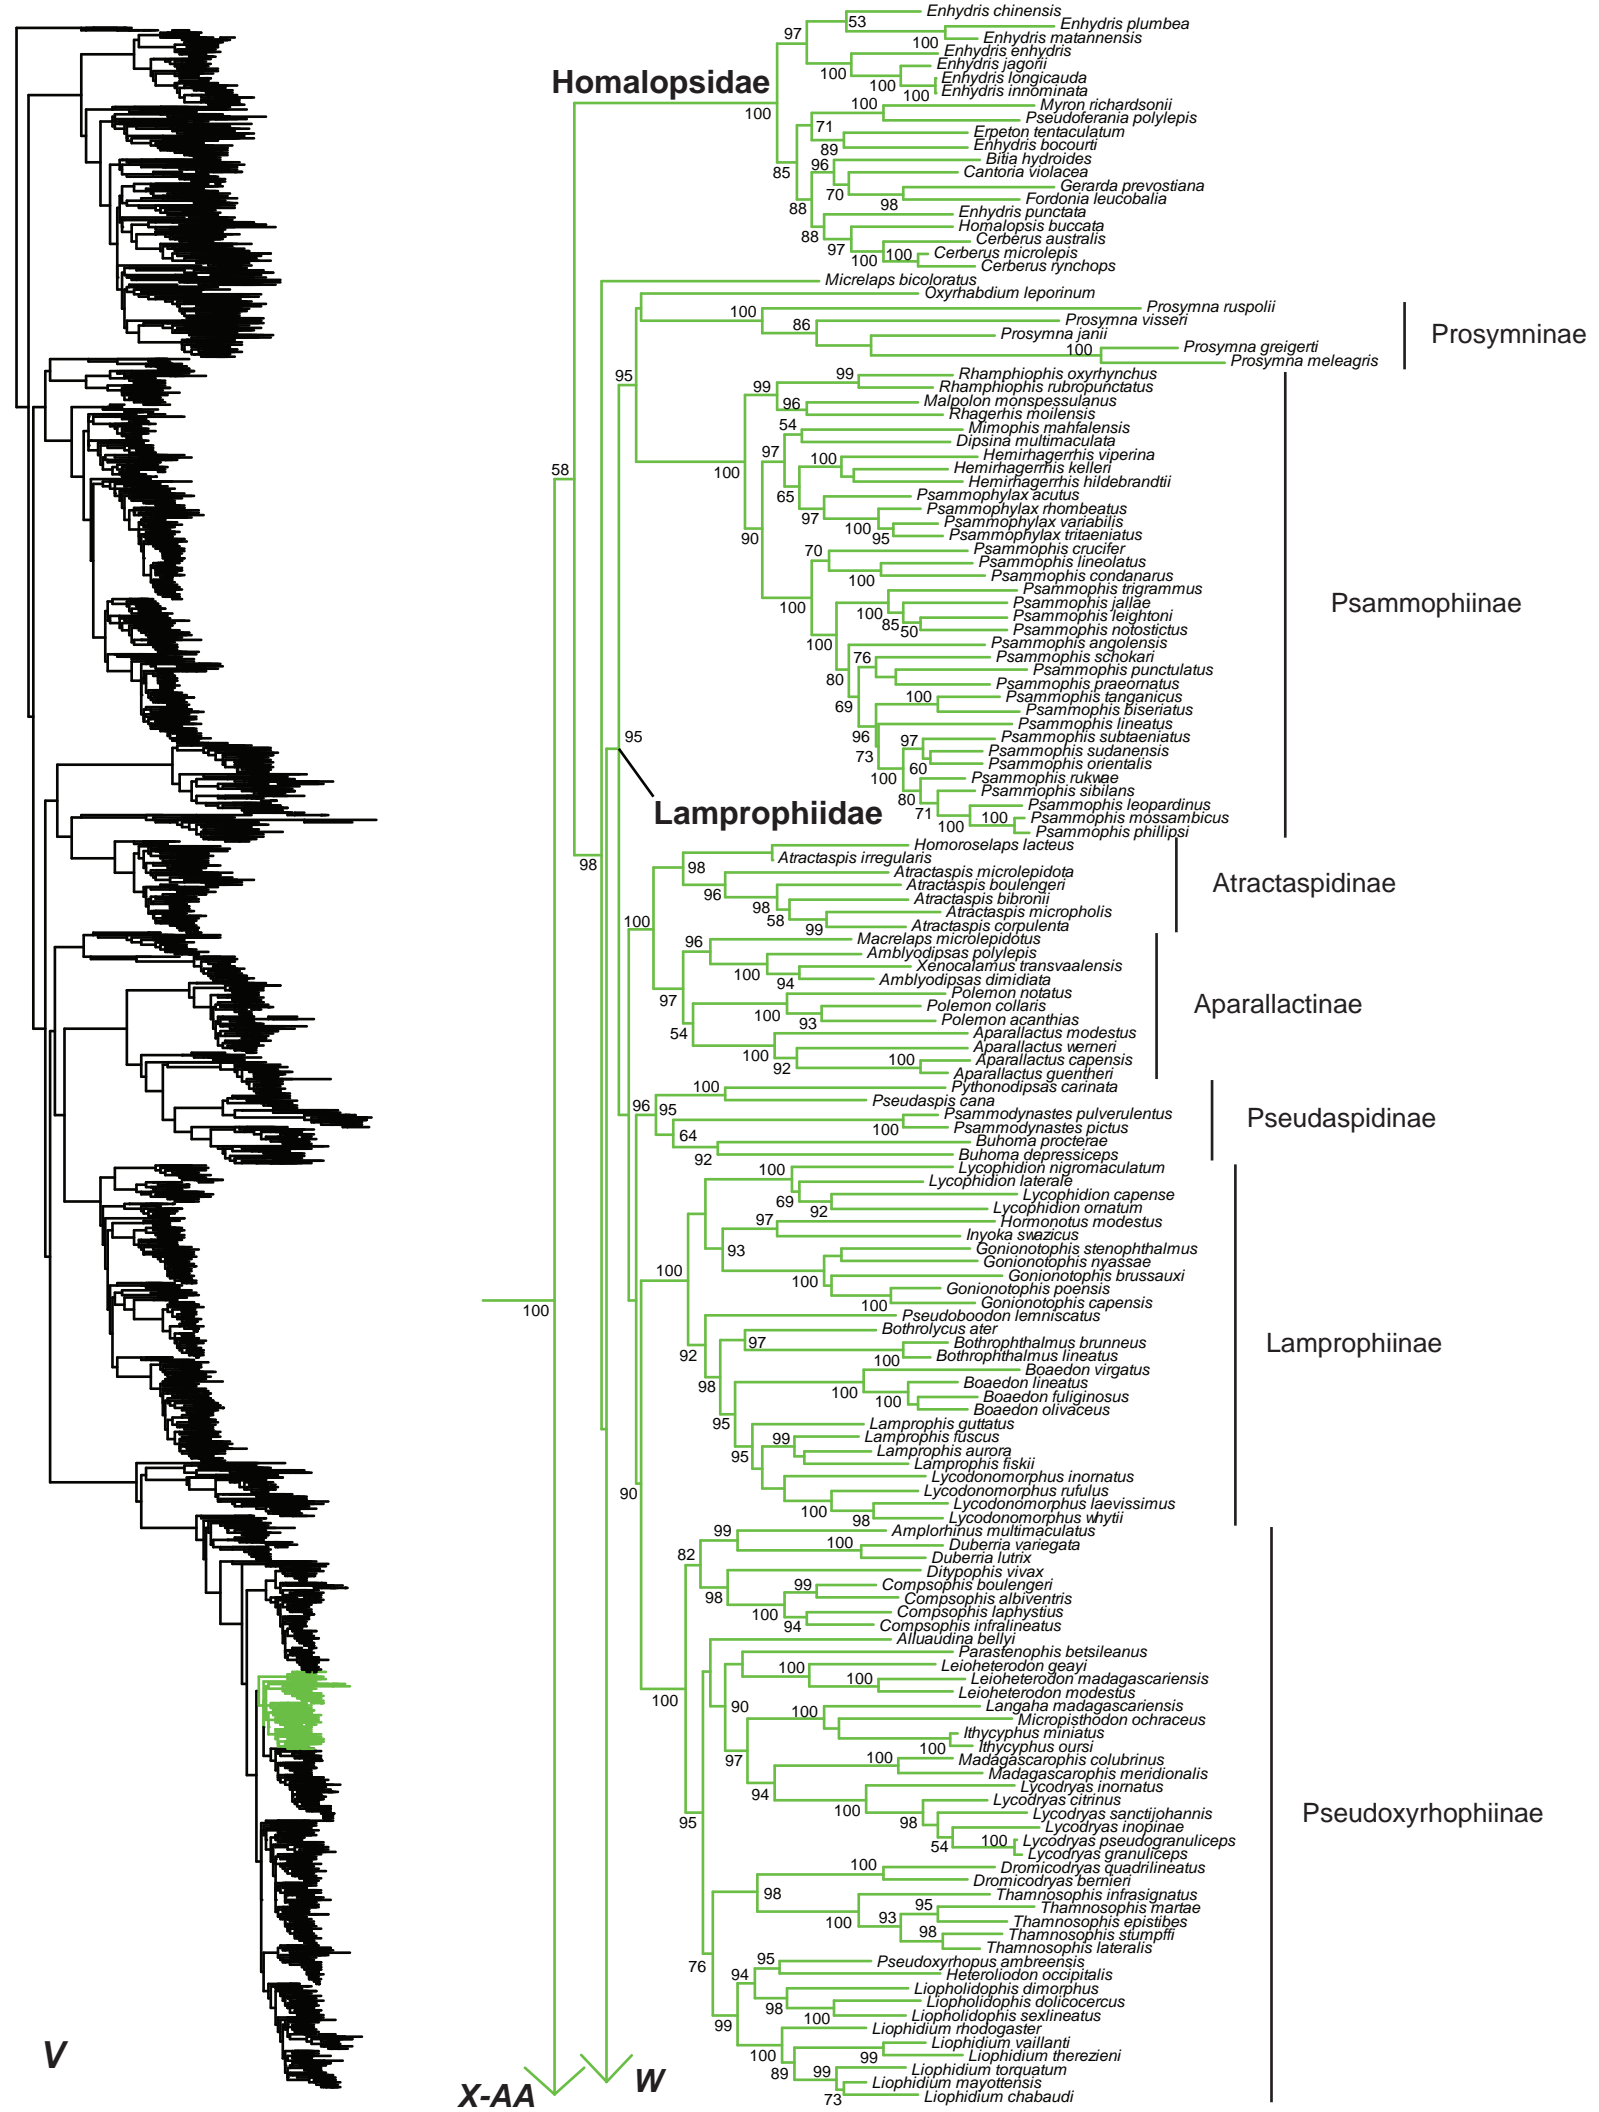

Supplement: 12862_2013_2346_MOESM25_ESM.pdf [file 12862_2013_2346_MOESM25_ESM.pdf]

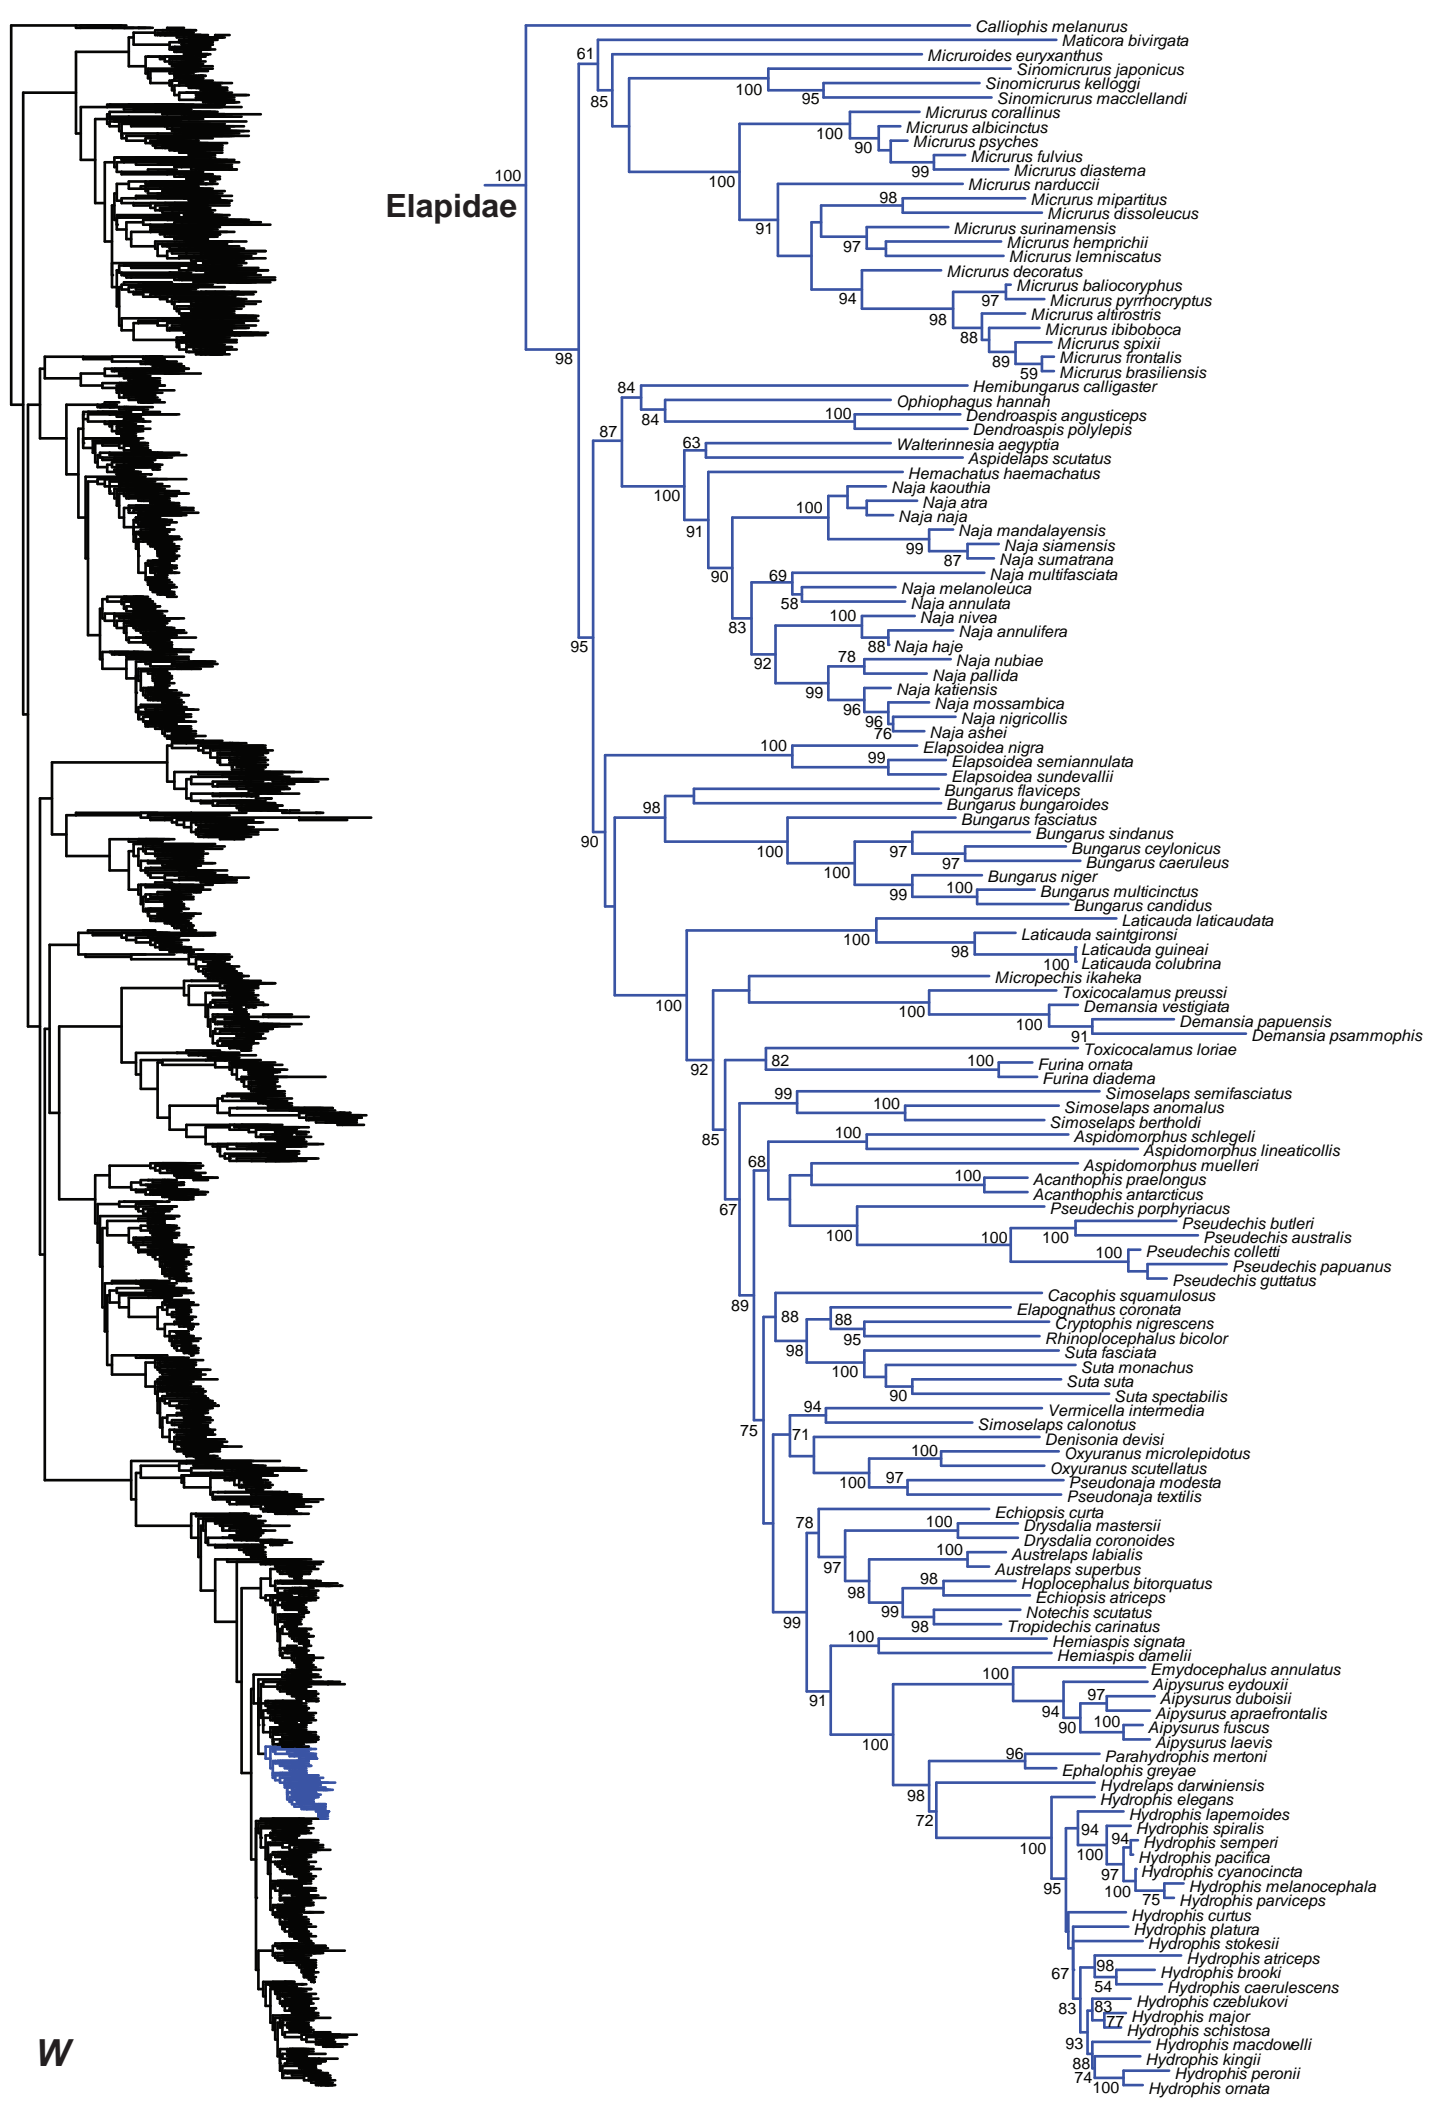

Supplement: 12862_2013_2346_MOESM26_ESM.pdf [file 12862_2013_2346_MOESM26_ESM.pdf]

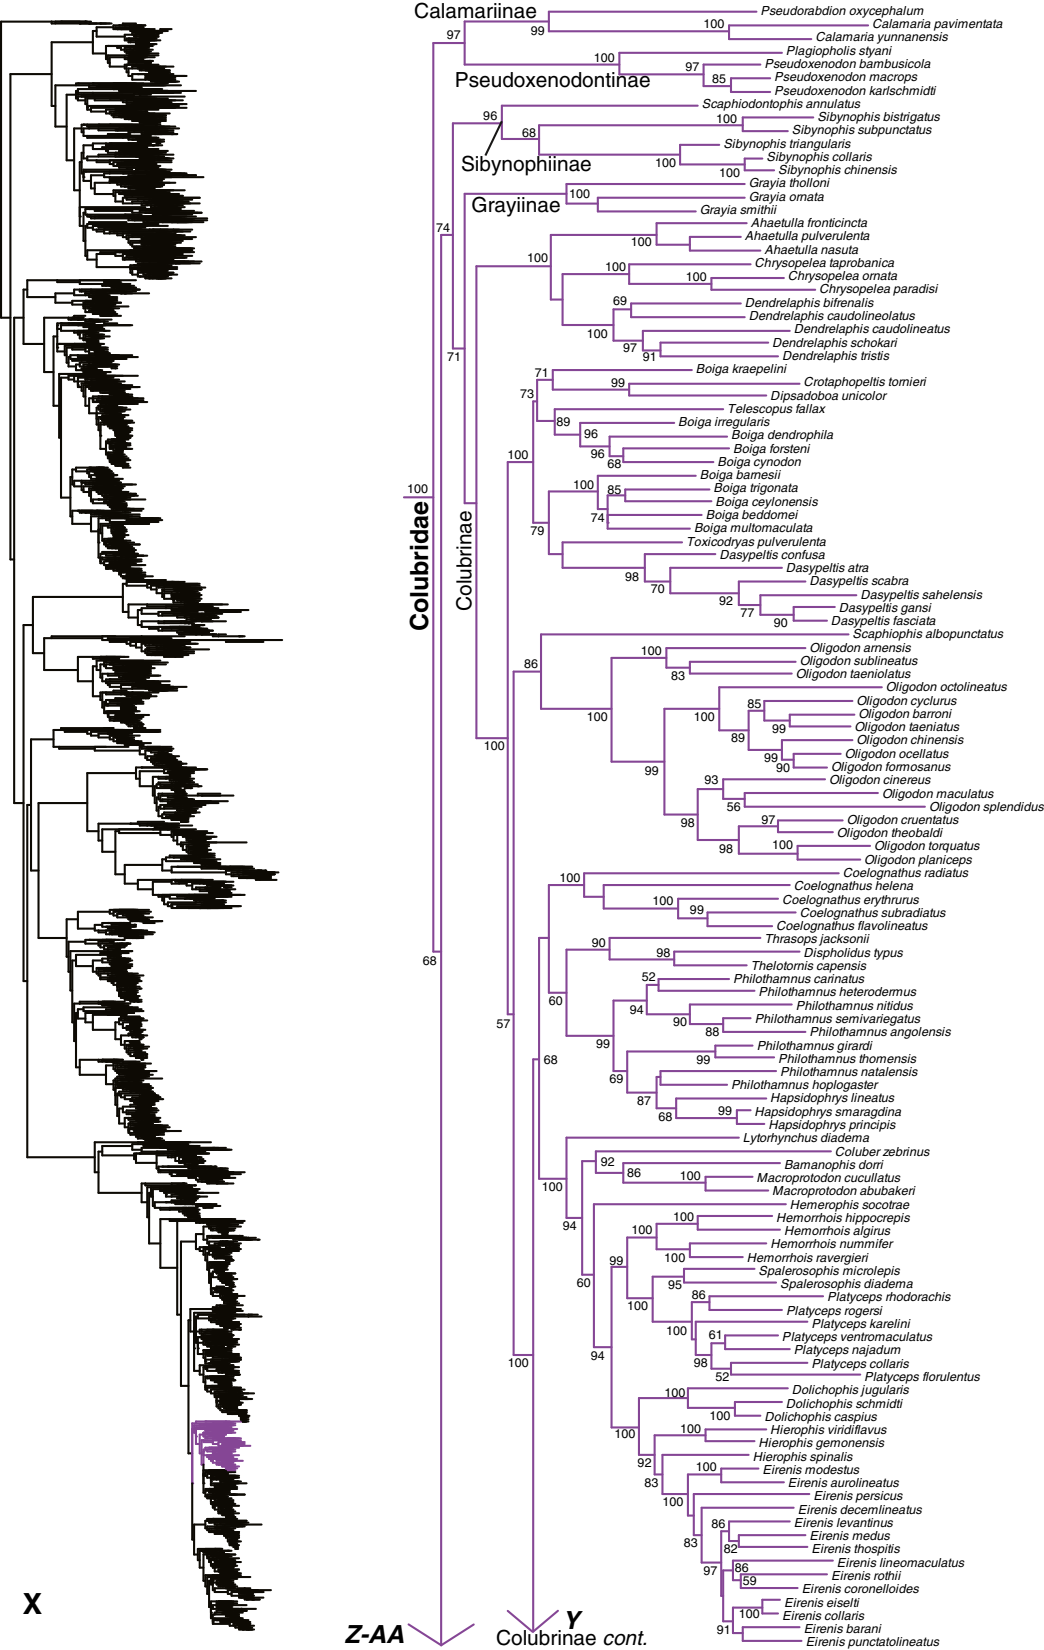

Supplement: 12862_2013_2346_MOESM27_ESM.pdf [file 12862_2013_2346_MOESM27_ESM.pdf]

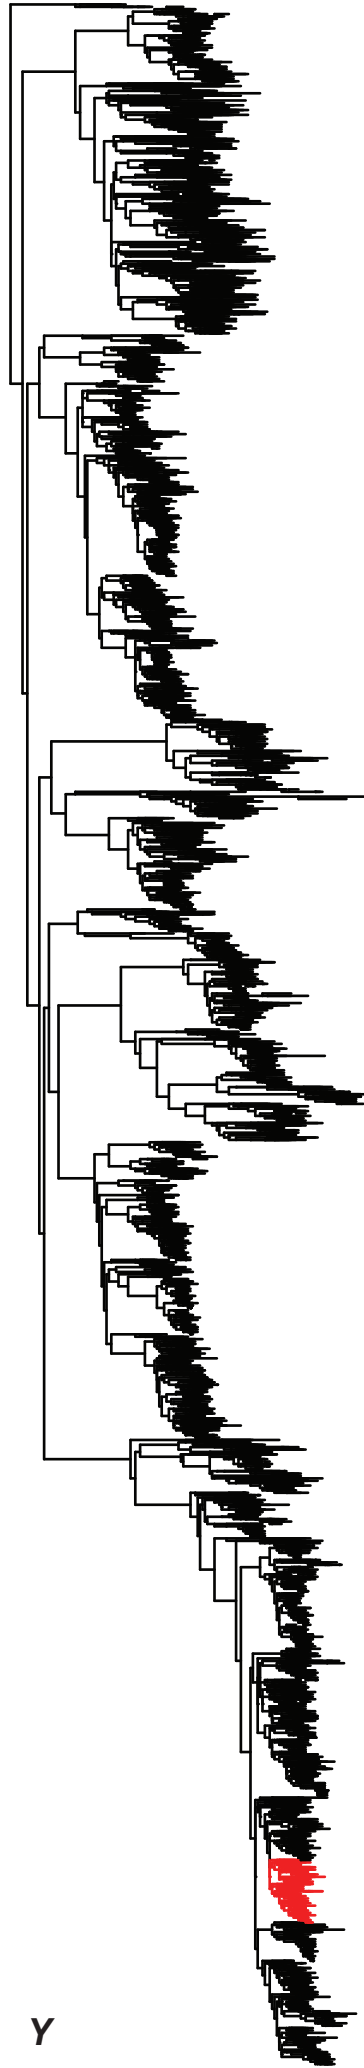

Colubrinae cont.

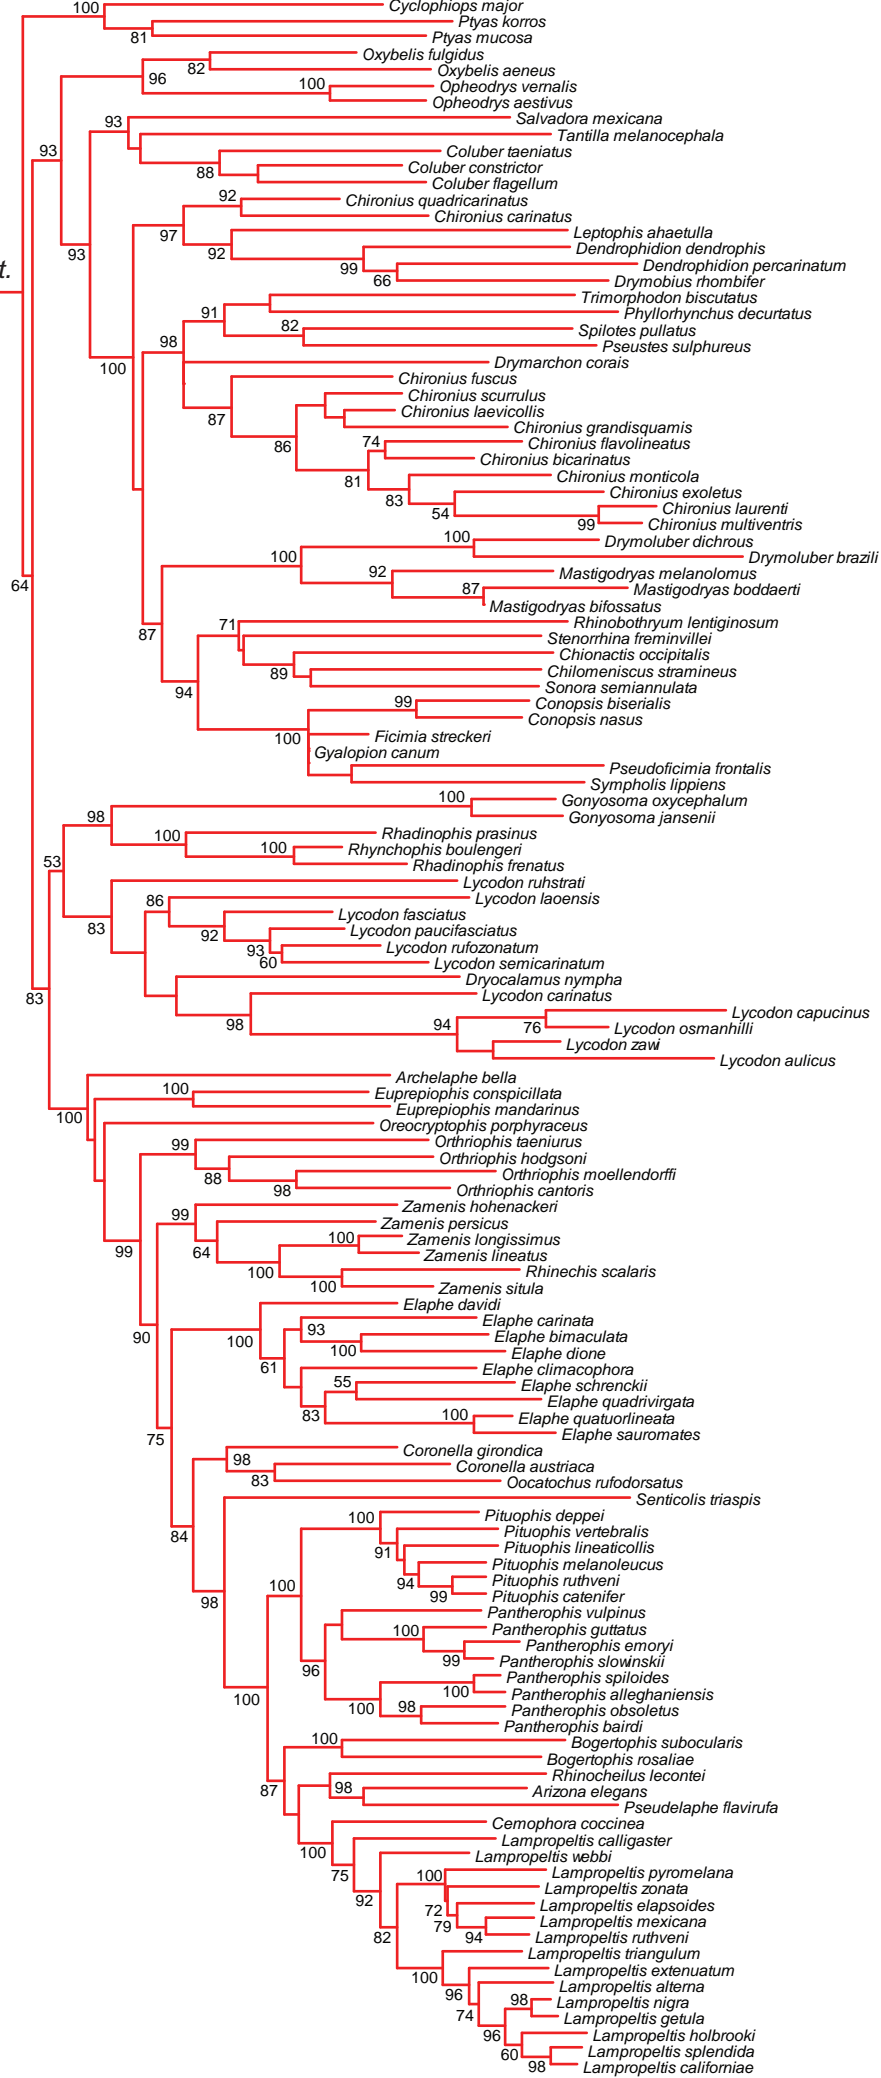

Supplement: 12862_2013_2346_MOESM28_ESM.pdf [file 12862_2013_2346_MOESM28_ESM.pdf]

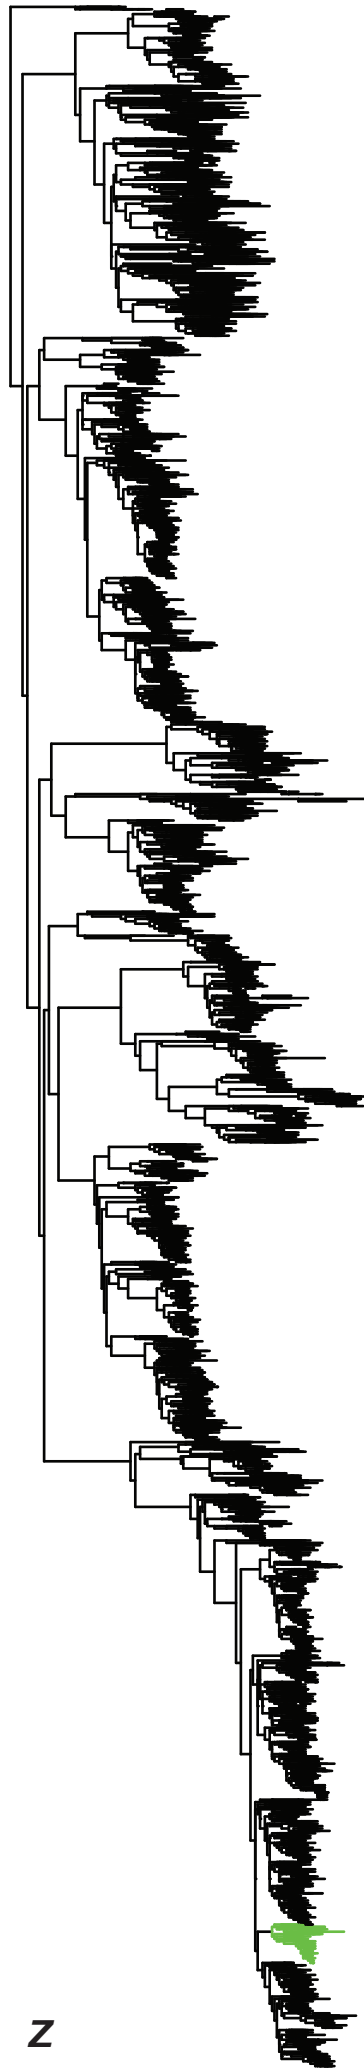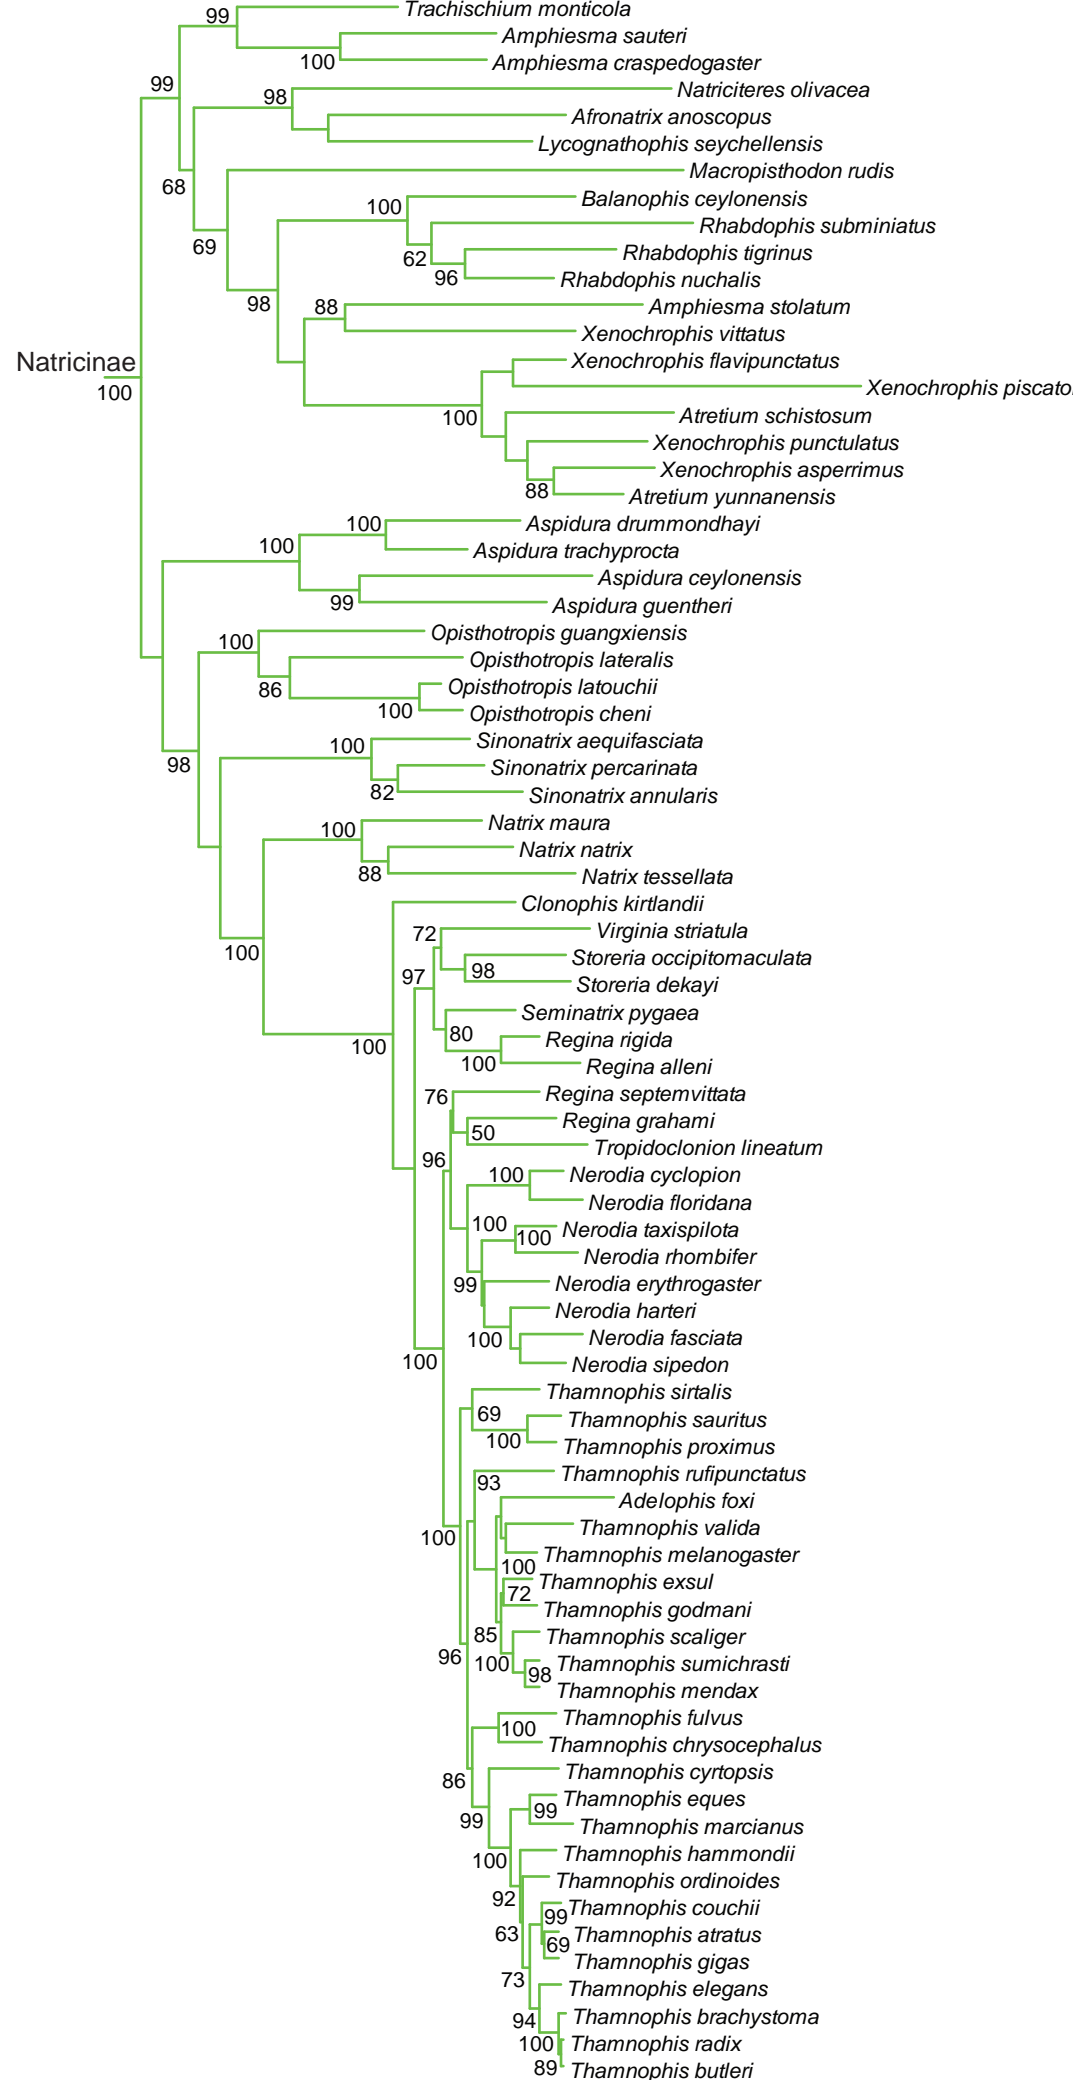

Z

Supplement: 12862_2013_2346_MOESM29_ESM.pdf [file 12862_2013_2346_MOESM29_ESM.pdf]

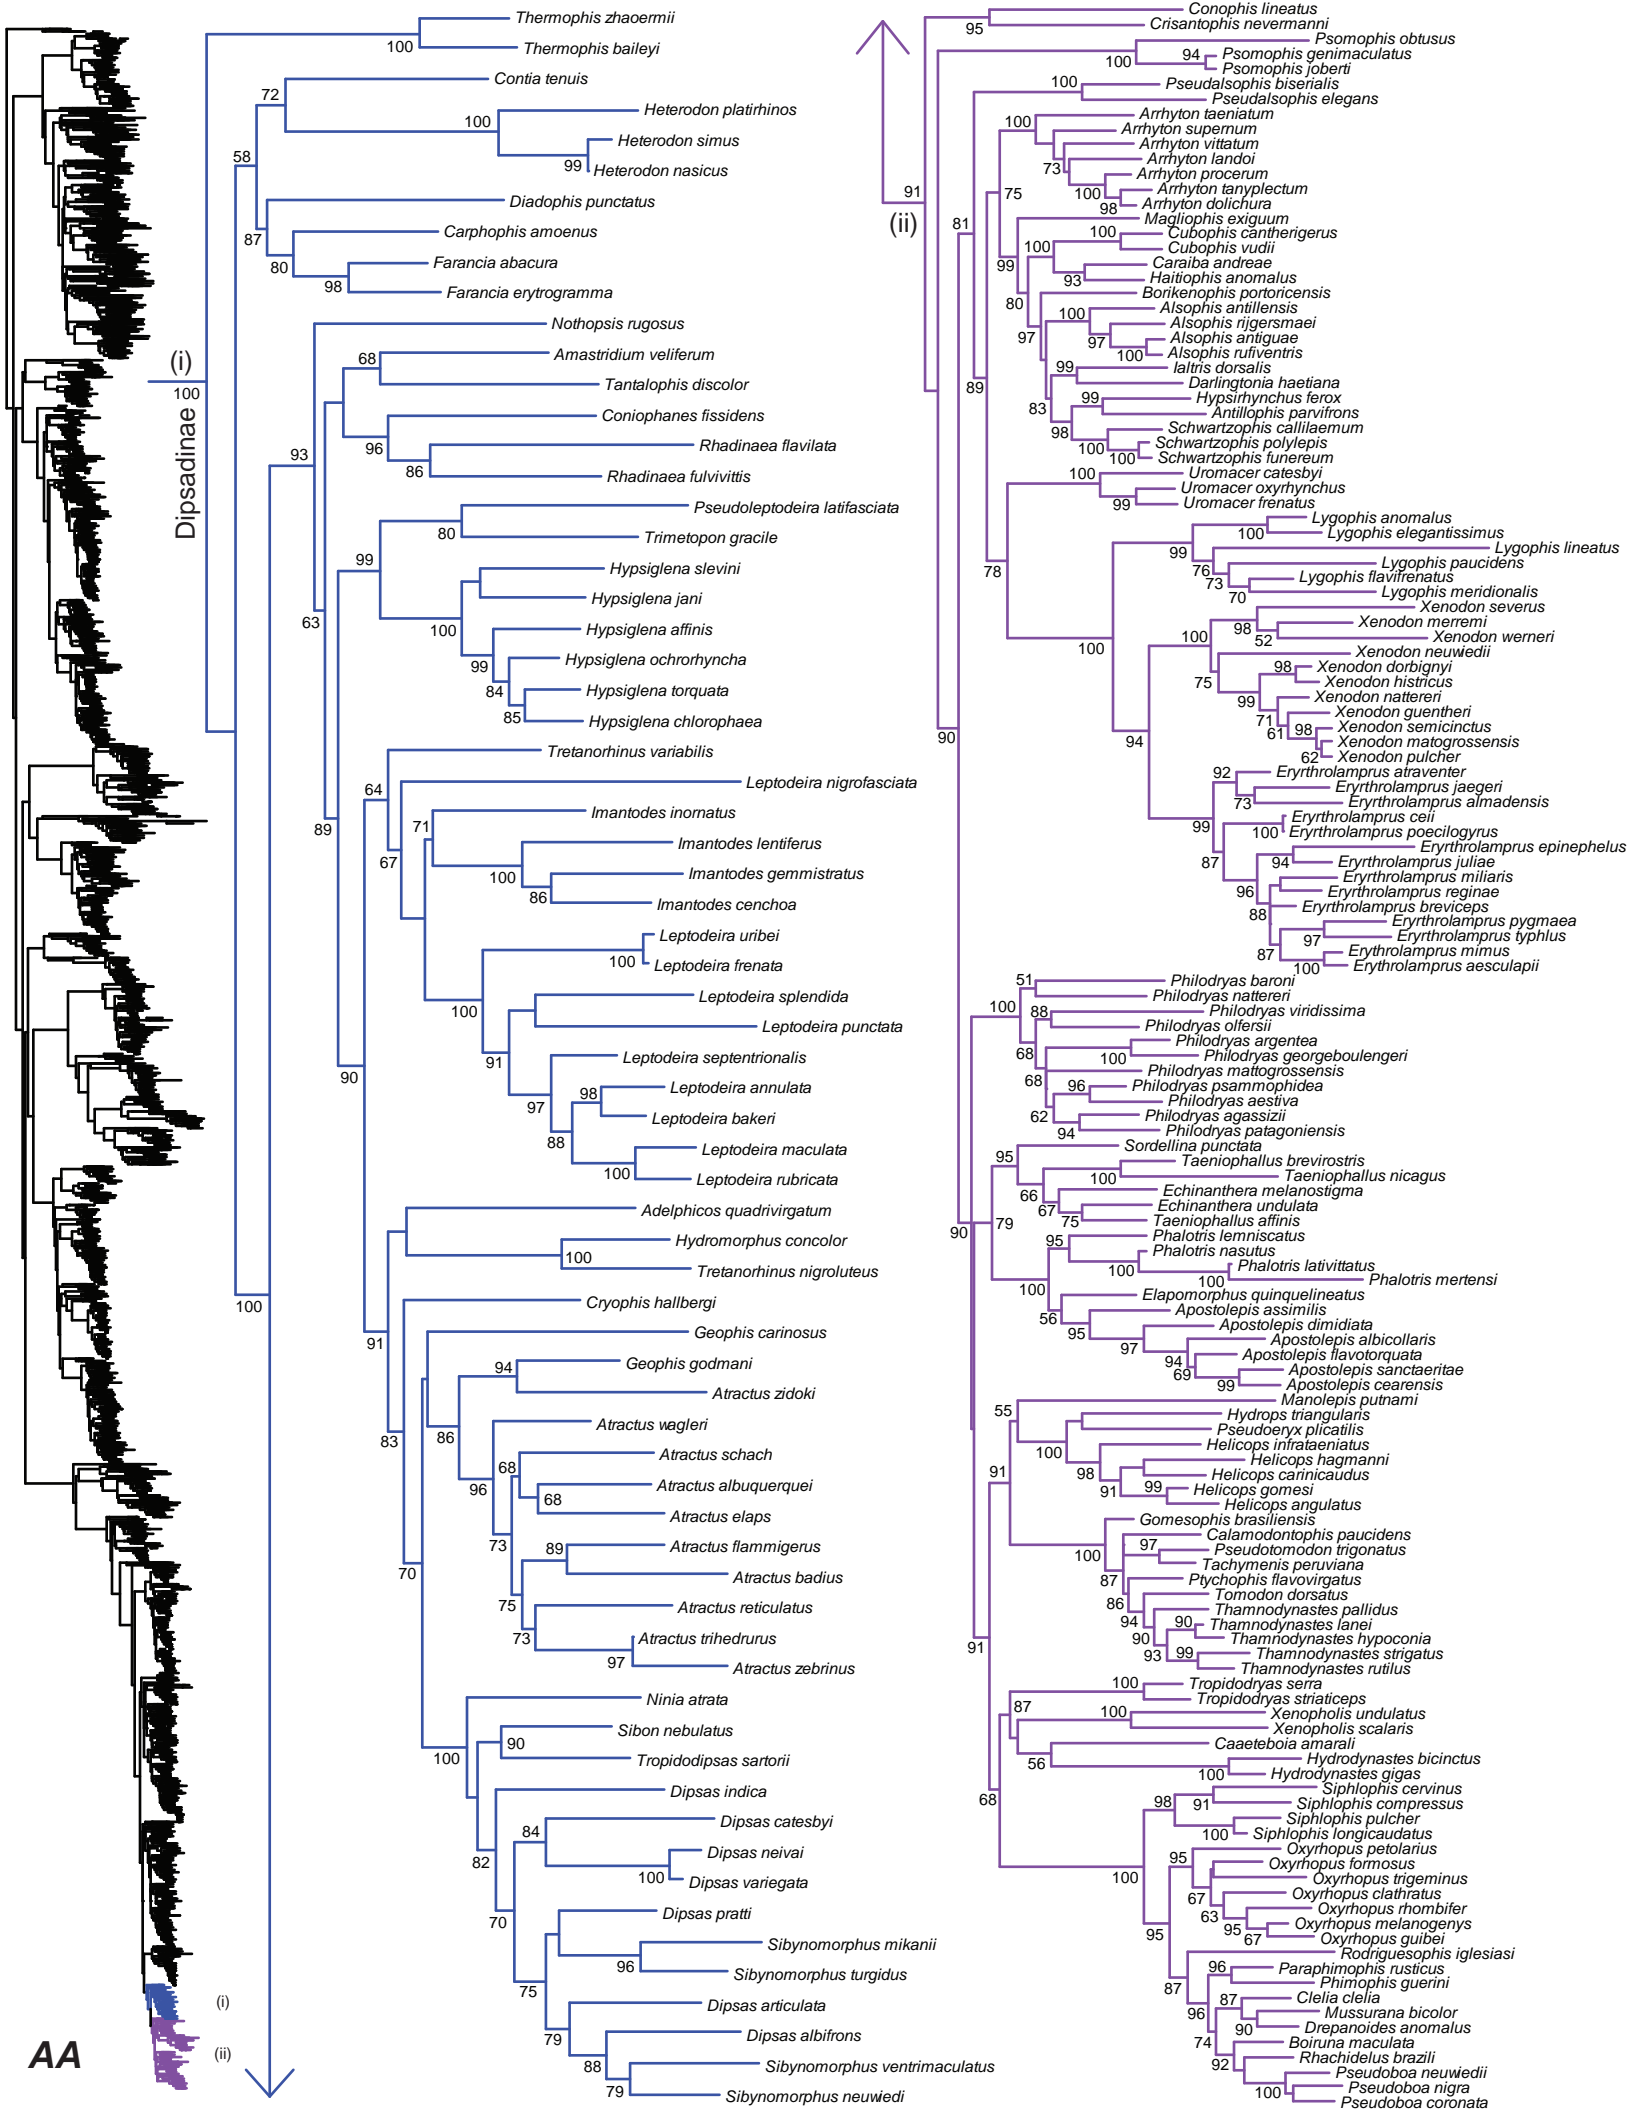

Supplement: 12862_2013_2346_MOESM30_ESM.pdf [file 12862_2013_2346_MOESM30_ESM.pdf]

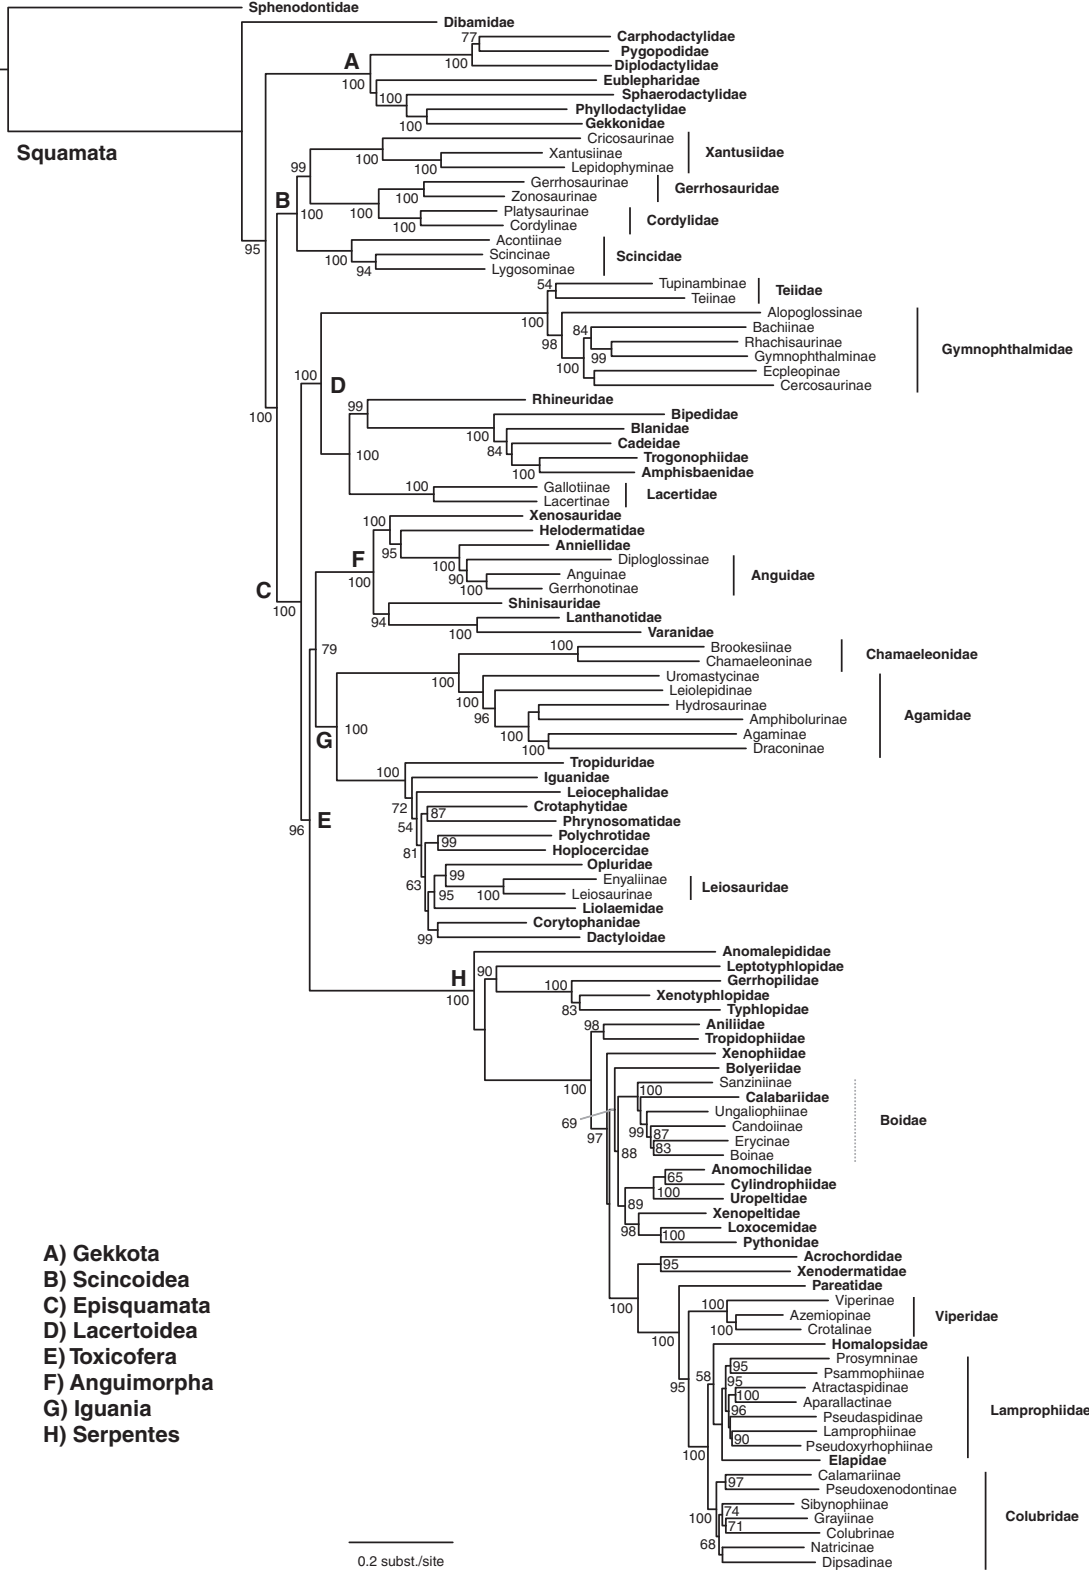

Supplement: 12862_2013_2346_MOESM3_ESM.pdf [file 12862_2013_2346_MOESM3_ESM.pdf]

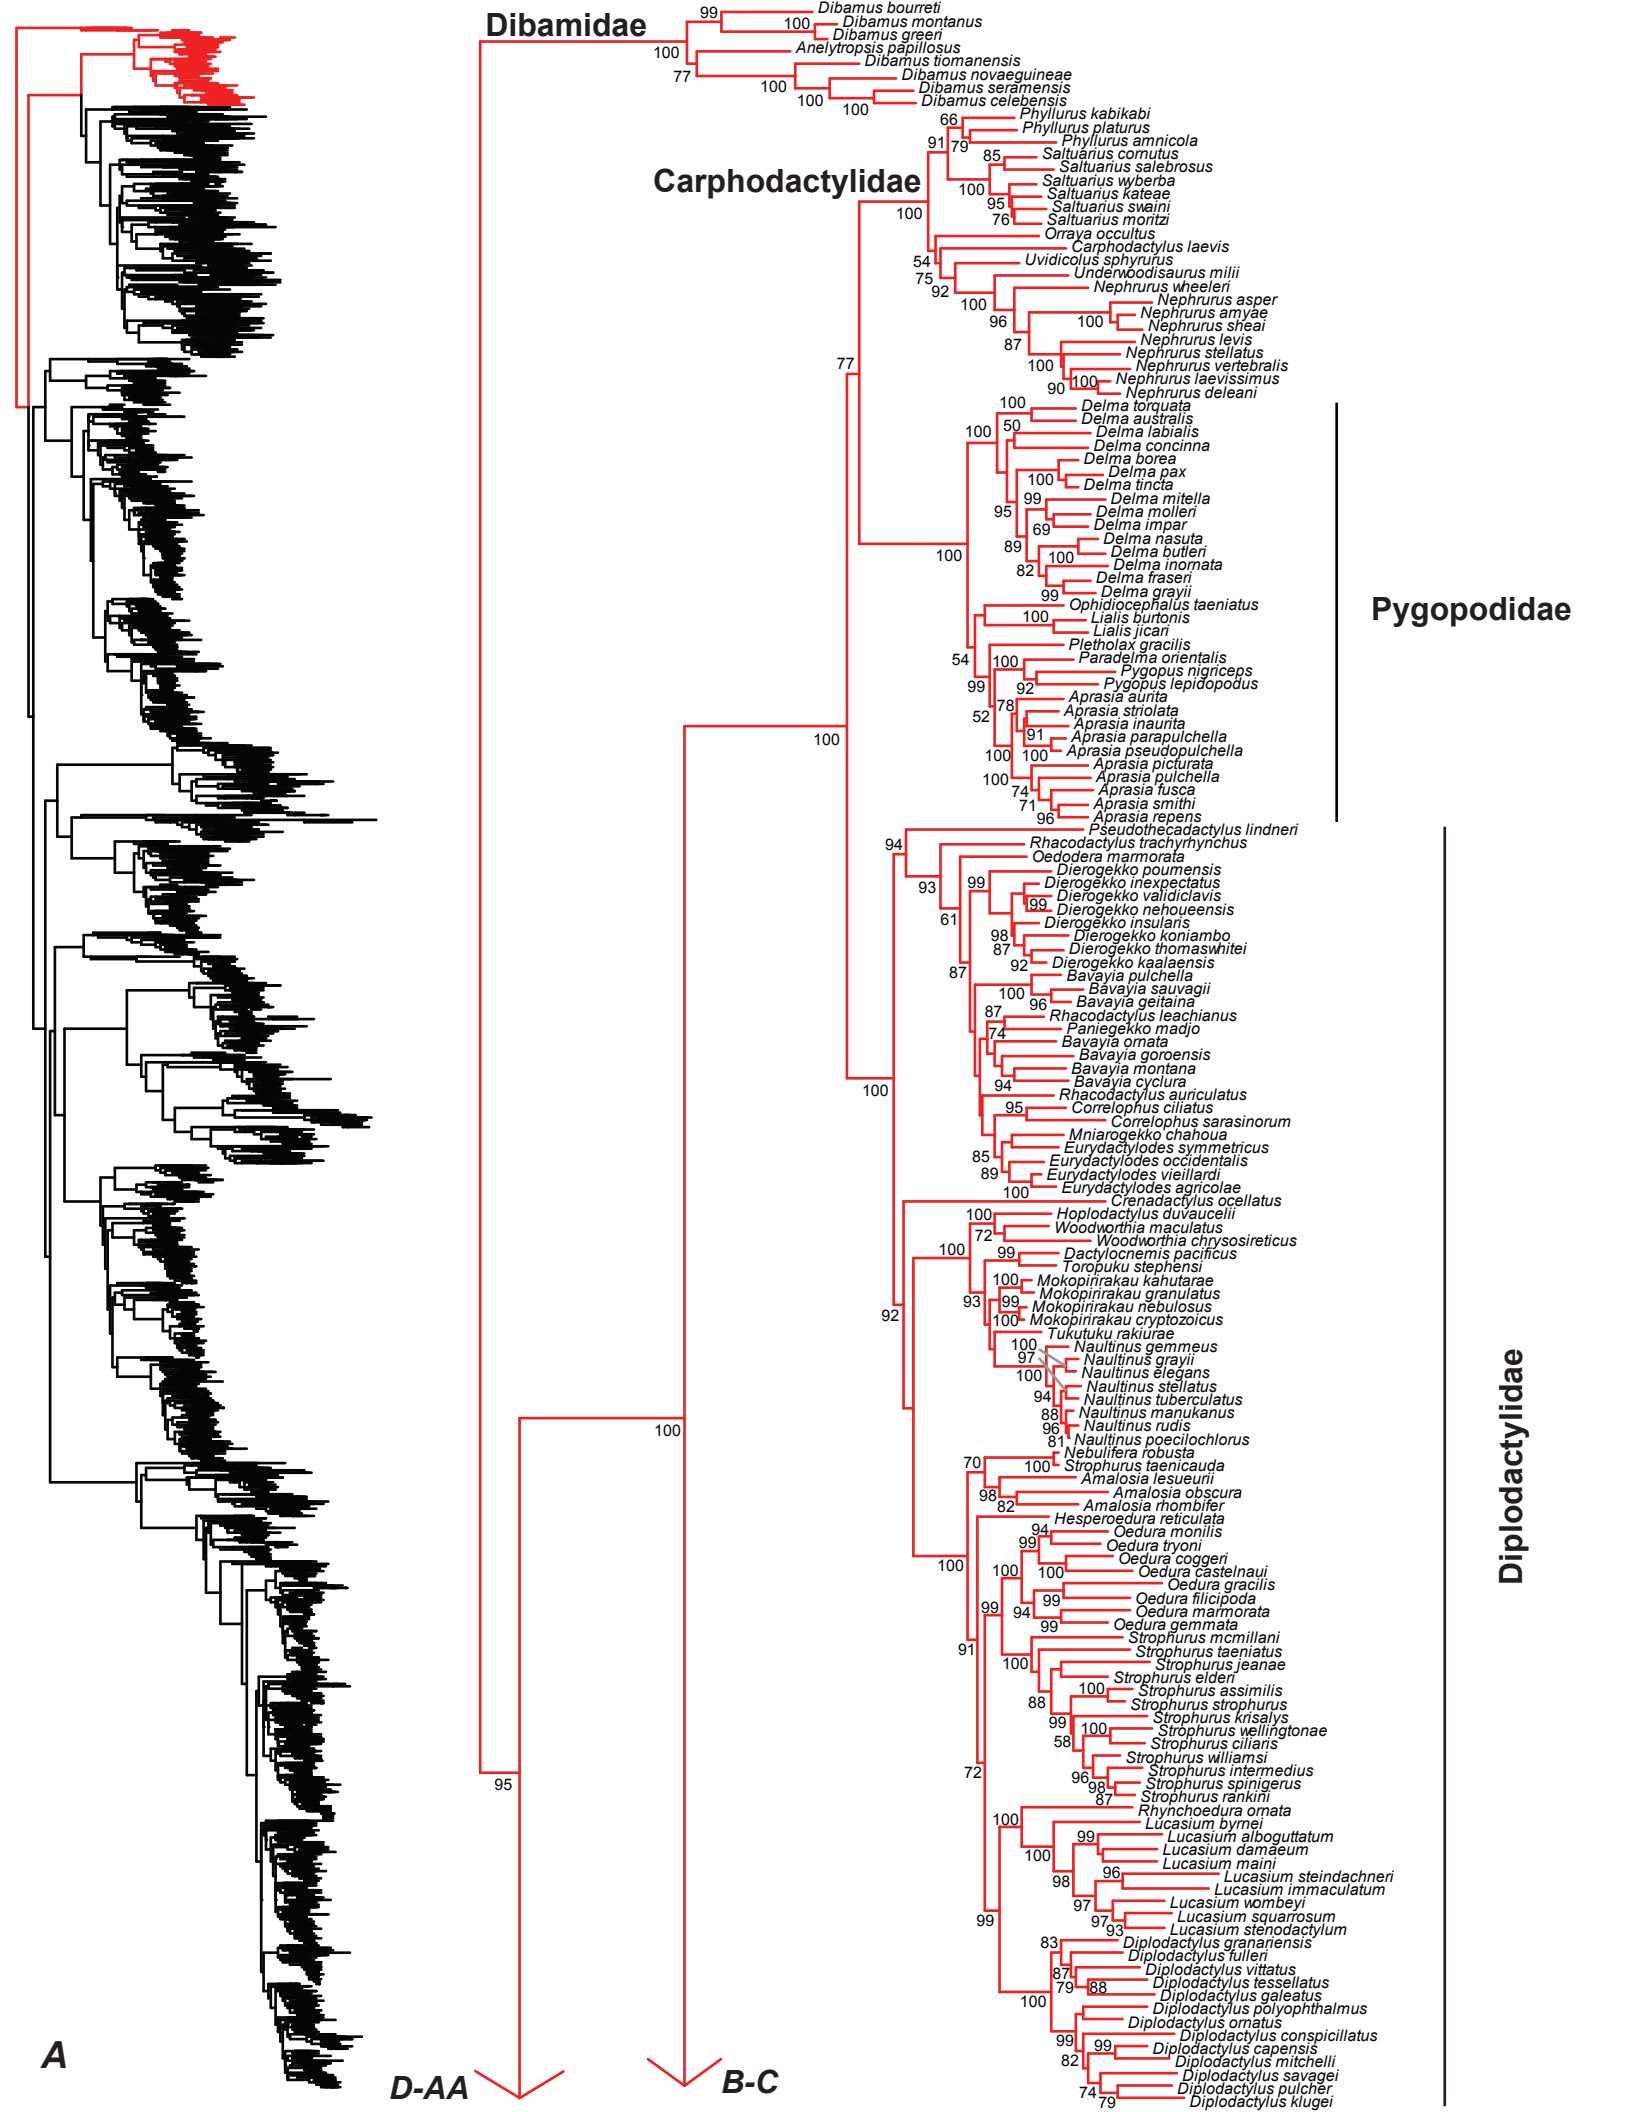

Supplement: 12862_2013_2346_MOESM4_ESM.pdf [file 12862_2013_2346_MOESM4_ESM.pdf]

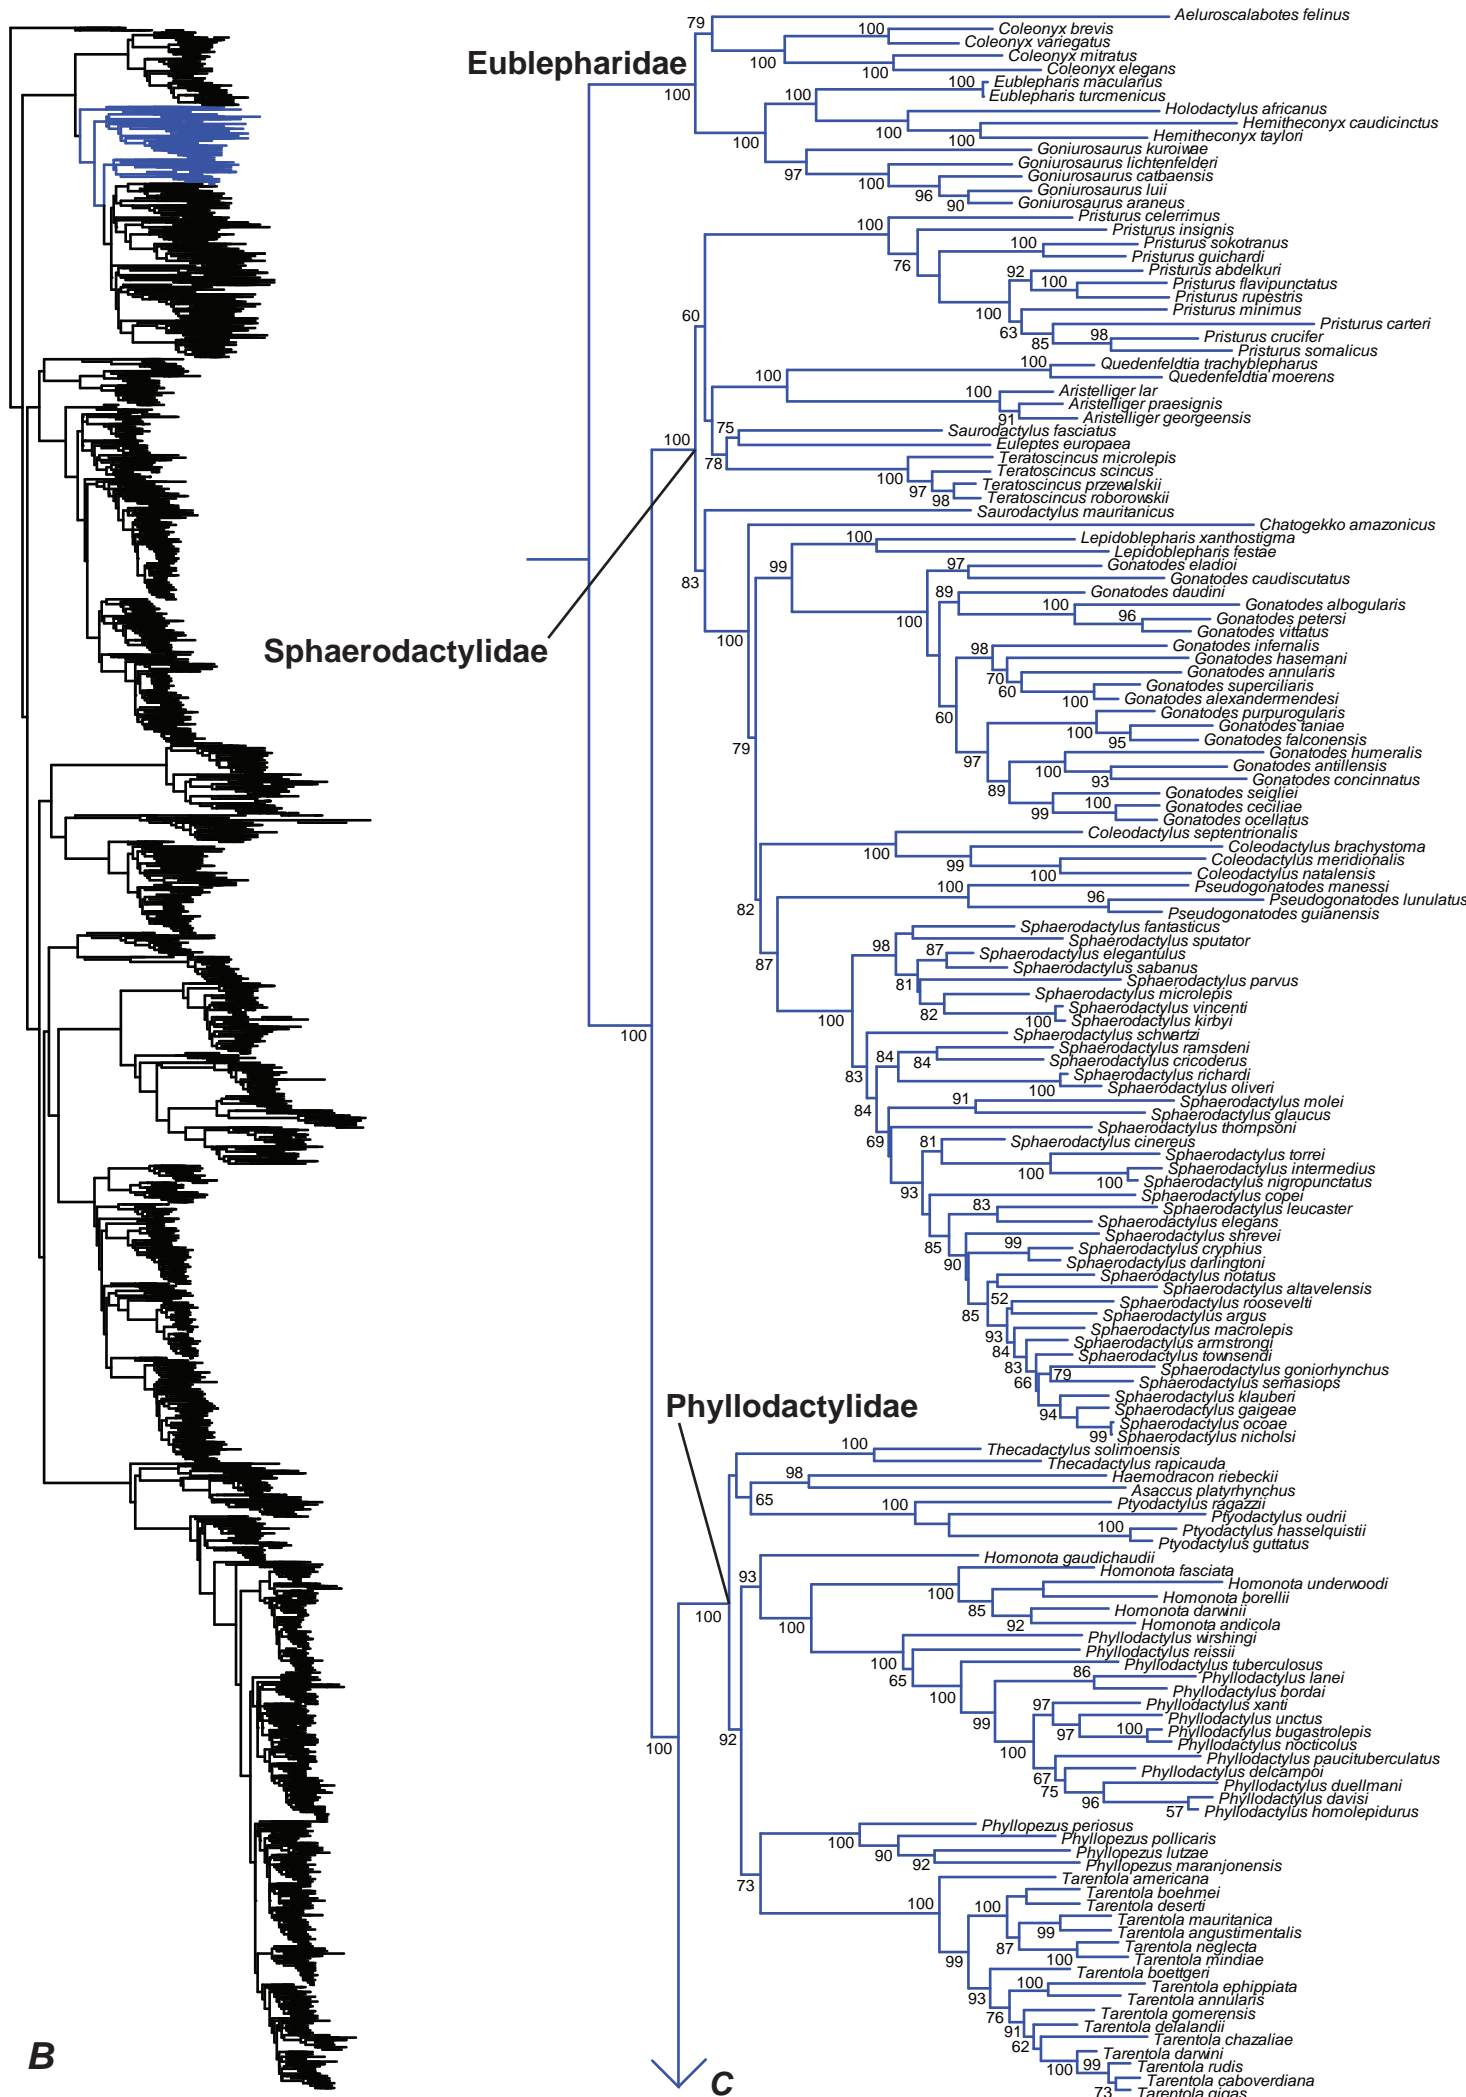

Supplement: 12862_2013_2346_MOESM5_ESM.pdf [file 12862_2013_2346_MOESM5_ESM.pdf]

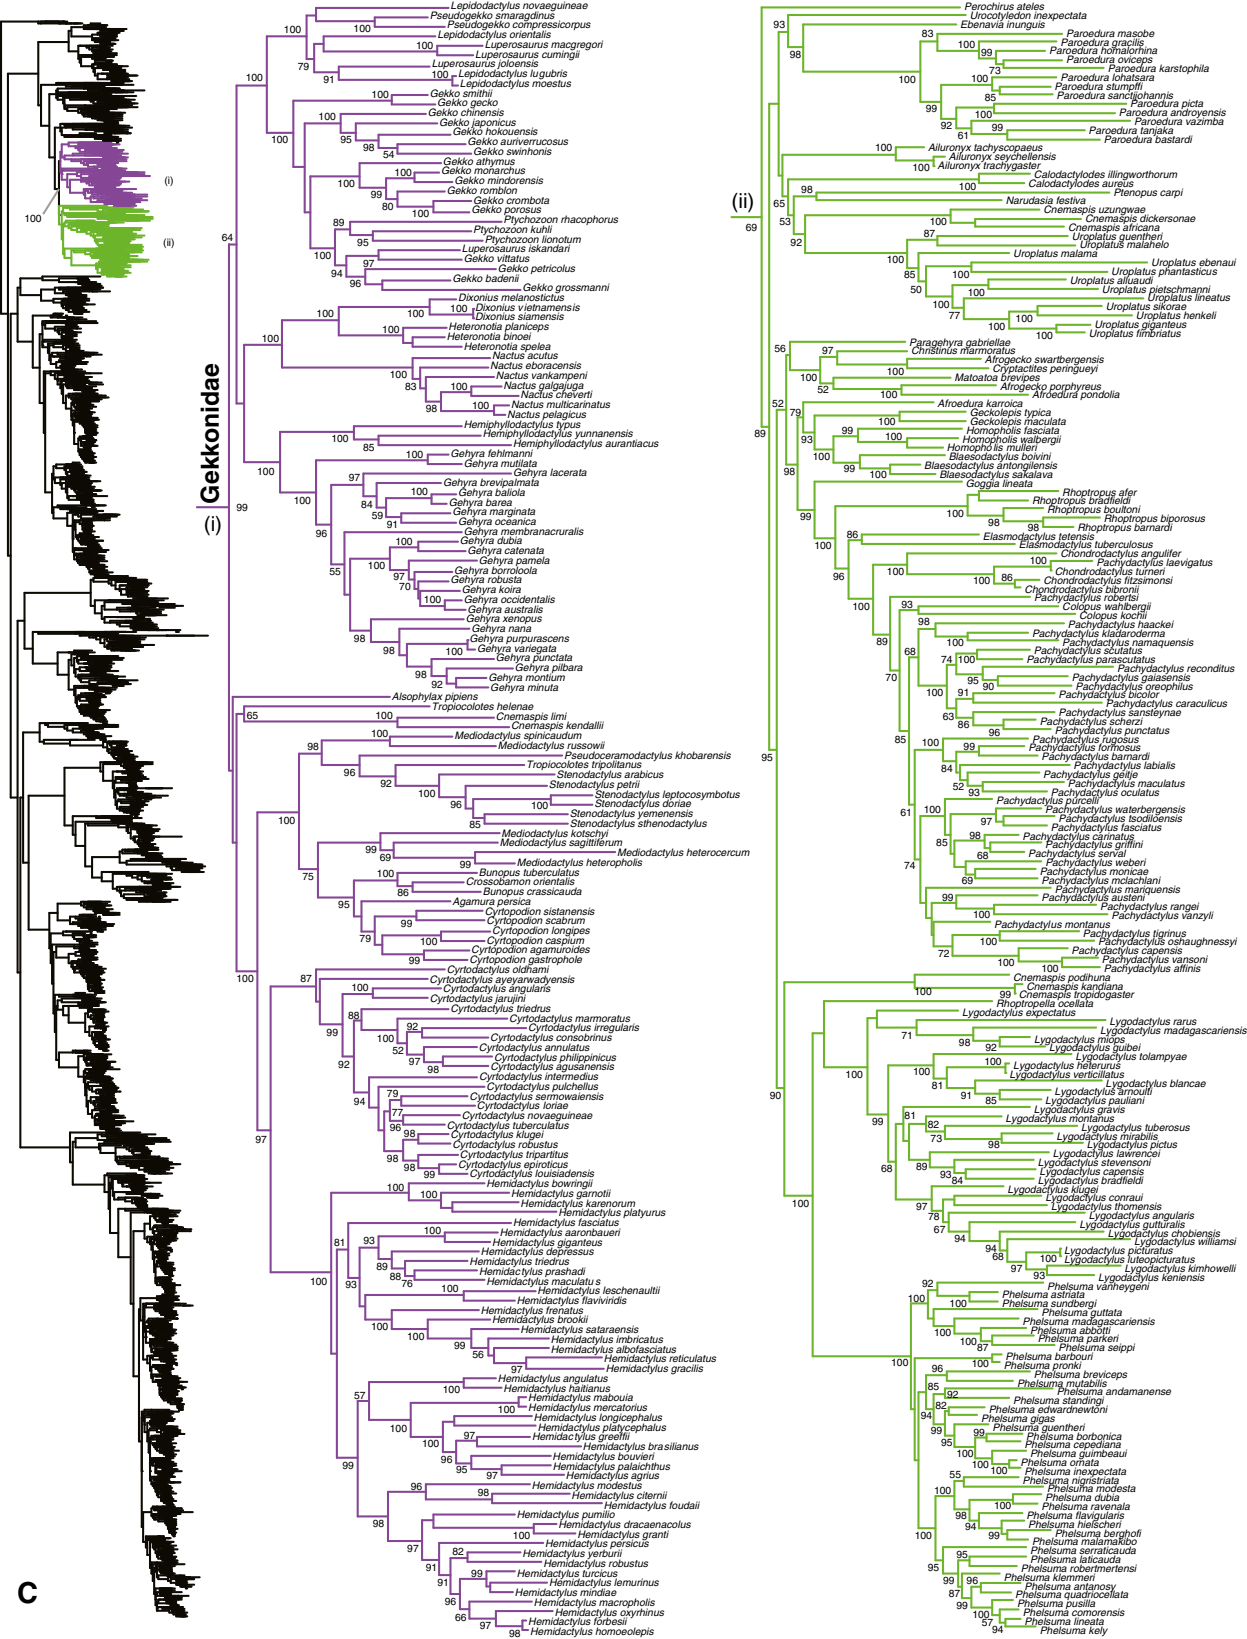

Supplement: 12862_2013_2346_MOESM6_ESM.pdf [file 12862_2013_2346_MOESM6_ESM.pdf]

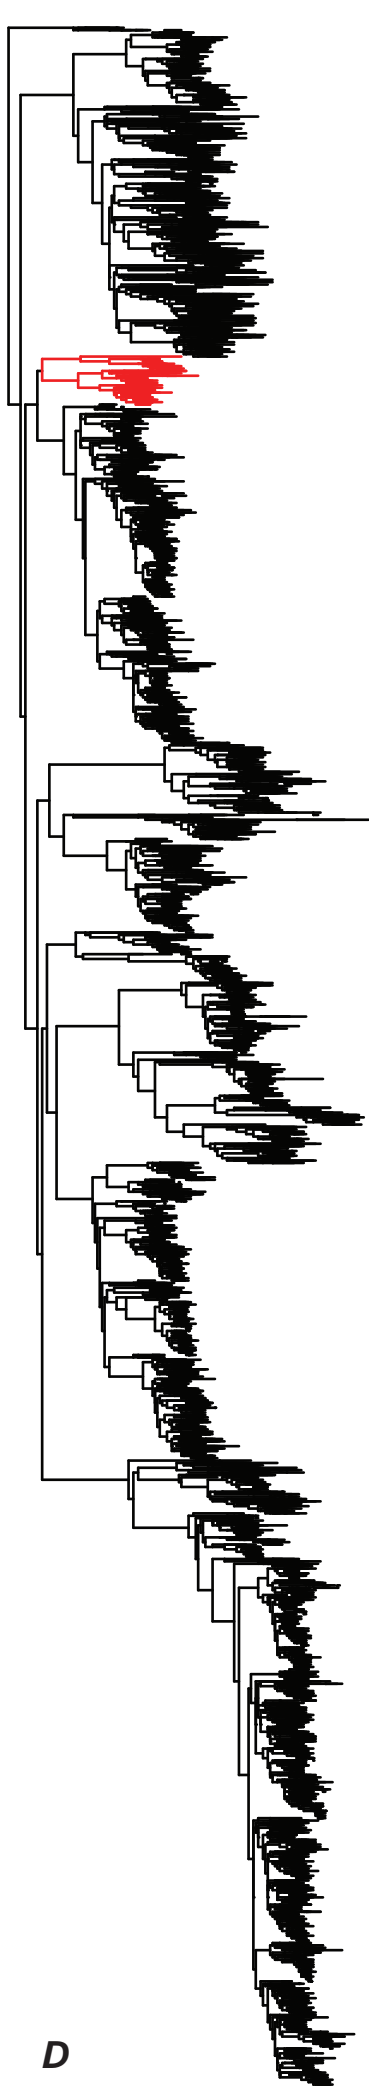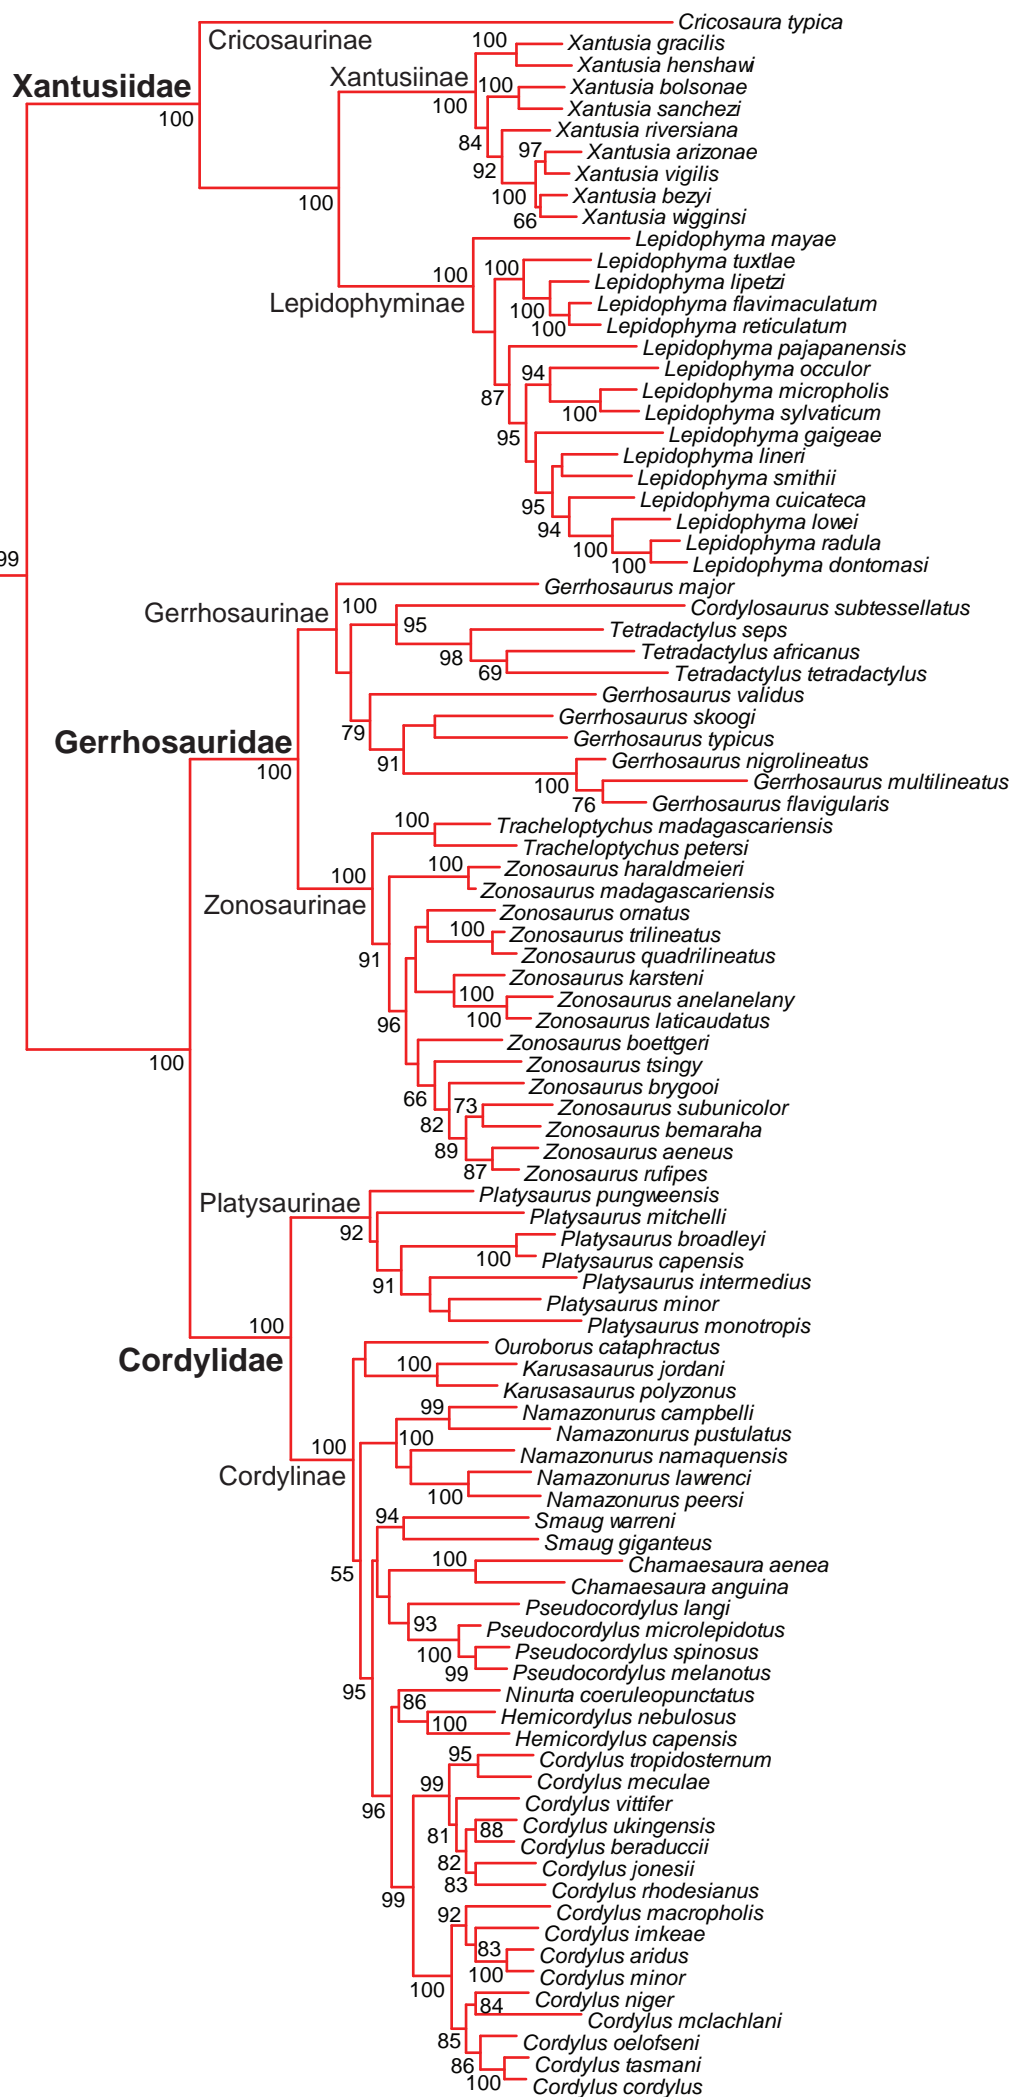

Supplement: 12862_2013_2346_MOESM7_ESM.pdf [file 12862_2013_2346_MOESM7_ESM.pdf]

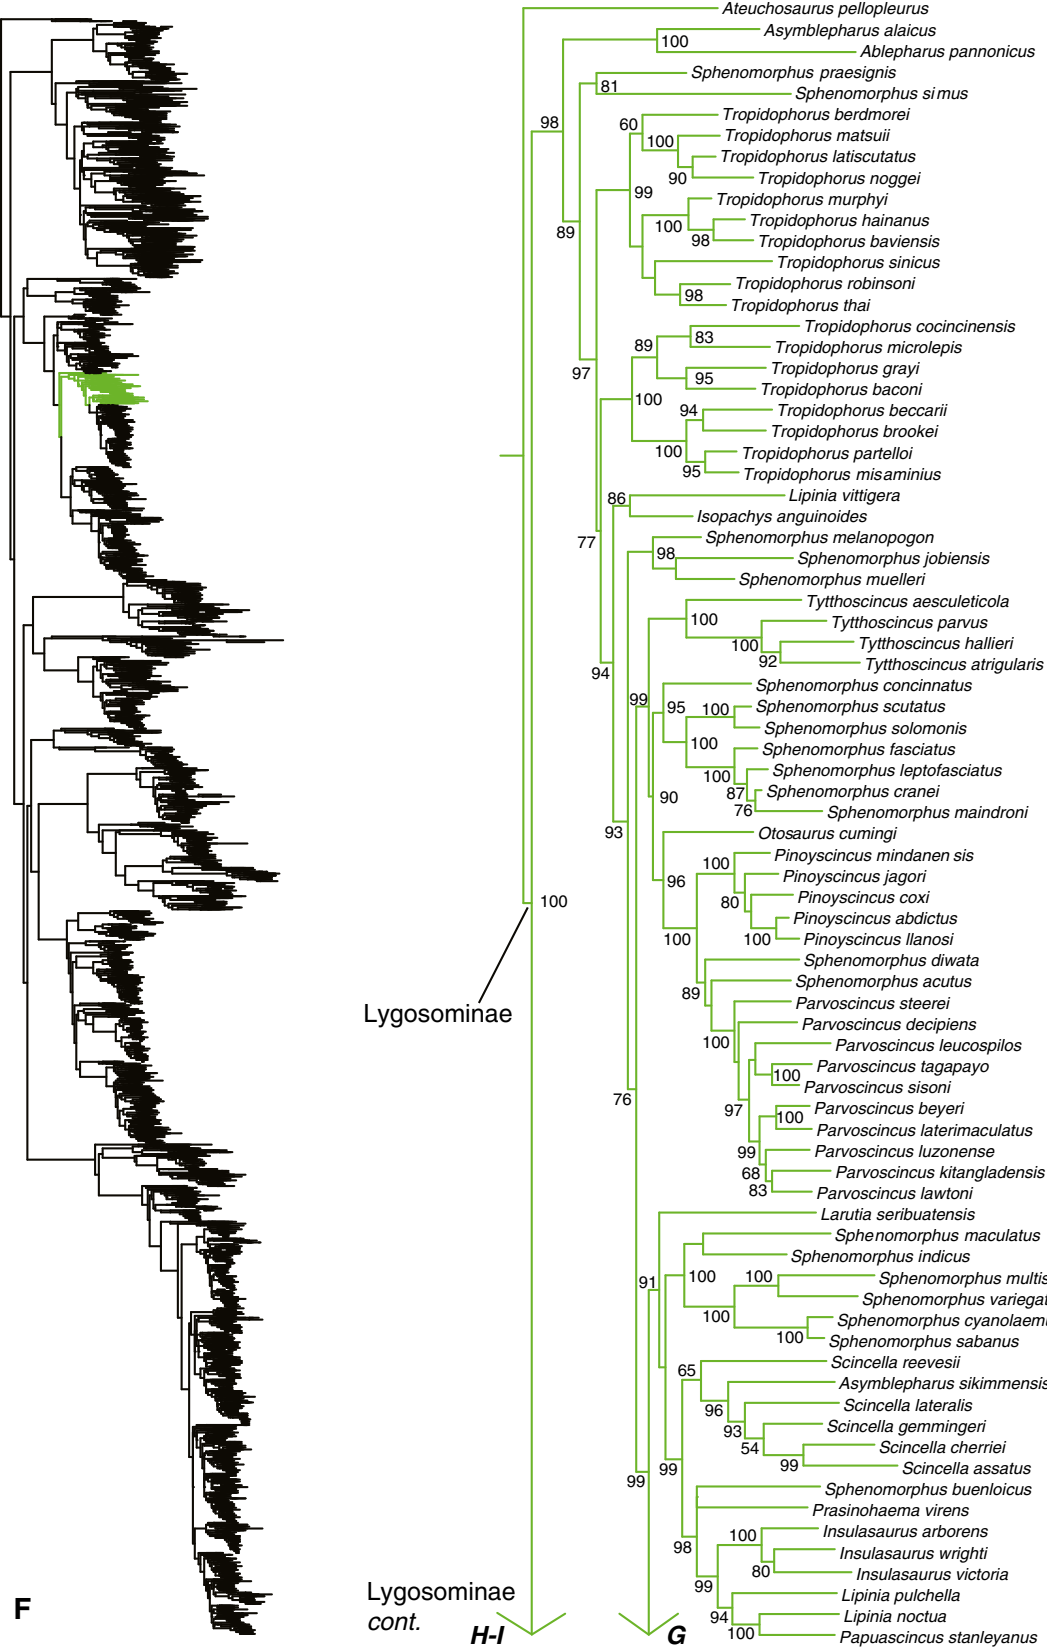

Supplement: 12862_2013_2346_MOESM9_ESM.pdf [file 12862_2013_2346_MOESM9_ESM.pdf]
